# Supplementary material for: A Survival Association Study of 102 Polymorphisms Previously Associated with Survival Outcomes in Colorectal Cancer
Source: Biomed Res Int. 2015 May 12;2015:968743. doi: 10.1155/2015/968743 (PMC4443940; doi:10.1155/2015/968743)
Supplement: Supplementary file 1 — Additional information and data related to this study is summarized in the Supplementary Material Excel document. Additional File 1: Information on the initial 149 SNPs. Additional File 2: SNPs (n=102) included in this study, allele frequencies, and genetic models. Additional File 3: Summary of previous literature reports on SNPs. Additional File 4: Kaplan-Meier curves (overall survival analysis). Additional File 5: Kaplan-Meier curves (disease free survival analysis). Additional File 6: Univariate and stage-adjusted Cox regression analysis results (overall survival). Additional File 7: Univariate and stage-adjusted Cox regression analysis results (disease-free survival). [file 968743.f1.xlsx]

## Sheet: Additional File-1
Unique genomic region number #	Gene or genomic region name as reported in dbCPCO database	SNP ID	Proxy SNP used?	*Proxy SNP ID	Excluded from the study?
1	15q13	rs4779584	no	no
2	AGO2	rs4961280			yes
3	ALCAM	rs1157	no	no
4	ANGPT1	rs1954727	no	no
5	CASP7	rs2227310	no	no
6	CASP9	rs4645978			yes
7	CD44	rs8193	no	no
8	CD47	rs12695175	no	no
9	CLOCK	rs1801260	no	no
	CLOCK	rs3749474	yes	rs1047354
10	CRP	rs1205	no	no
11	CXCL12	rs1801157	no	no
12	CXCR2	rs1126579	yes	rs7426289
13	DDX20	rs197388			yes
	DDX20	rs197412	no	no
14	DICER1	rs13078	no	no
15	DROSHA	rs6877842			yes
16	DUSP2	rs1724120	no	no
17	EBF2	rs9942838	yes	rs4568629
18	EGF	rs4444903	no	no
19	ESR2	rs1152578	yes	rs1152582
	ESR2	rs12435857	yes	rs4365213
	ESR2	rs1256030	no	no
	ESR2	rs1256043			yes
	ESR2	rs17226088	no	no	yes (MAF < 5%)
	ESR2	rs17766755			yes
	ESR2	rs2978381	no	no
	ESR2	rs2987983	no	no
	ESR2	rs3020443	no	no
	ESR2	rs4986938	no	no
	ESR2	rs7157428	yes	rs8003490
	ESR2	rs8006145	no	no
20	EZH2	rs3757441	no	no
21	FCGR3A	n/a (rs396991)			yes
22	GEMIN4	rs2740348	no	no
	GEMIN4	rs7813	no	no
23	GNAS	rs7121	no	no
24	GPC5	rs553717	no	no
25	GREM1	rs10318	no	no
26	GWAS-associated susceptibility allele	rs7013278			yes
27	GWAS-associated susceptibility allele	rs7014346	no	no
28	HS2ST1	rs9433110	no	no
29	HSPA5	rs391957	no	no
30	IFNGR1	rs1327474	no	no
	IFNGR1	rs9376267	no	no
31	IFNGR2	rs2834211	no	no
	IFNGR2	rs2834213			yes
32	IGF1	rs6220	no	no
33	IKBKB	rs11986055	no	no	yes (MAF < 5%)
34	IL1A	rs3783546	yes	rs10496444
35	IL1B	rs1143623			yes
	IL1B	rs1143627	no	no
36	IL3	rs181781	no	no
37	IL8	rs4073			yes
38	IRF2	rs12504466	no	no
	IRF2	rs13116389	no	no
	IRF2	rs1425551			yes
	IRF2	rs2797507			yes
	IRF2	rs3756094	no	no
	IRF2	rs3775582	no	no
	IRF2	rs3822118	no	no
	IRF2	rs7655800	yes	rs7685698
	IRF2	rs793801			yes
	IRF2	rs793814			yes
	IRF2	rs9684244			yes
39	IRF6	rs2013196			yes
40	IRF8	rs1044873	no	no
	IRF8	rs305083	yes	rs16882
41	LGR5	rs17109924	no	no
42	LOC120376 locus	rs10749971	no	no
43	LOC730134?	rs10211390			yes
44	MACC1	rs1990172	no	no
45	MAP2K1	rs17259670	yes	rs17258507
	MAP2K1	rs8039880	no	no
46	MAP3K1	rs33323	yes	rs11960484
47	MAP3K11	rs11227234	no	no
	MAP3K11	rs1151488	no	no
	MAP3K11	rs7116712			yes
48	MAP3K12 (or TARBP2)	rs784567	no	no
49	MAP3K9	rs17766621	no	no
50	MAPK14	rs10807156			yes
51	mir219-1	rs213210	no	no
52	mir26a-1	rs7372209	no	no
53	mir30c-1	rs16827546	yes	rs11208727	yes (MAF < 5%)
54	MIR373	rs12983273	no	no
55	MIR423	rs6505162	no	no
56	MIR604	rs2368392	no	no
57	MIR608	rs4919510	no	no
58	MIRLET7F2	rs17276588			yes
59	MSH2	rs3732183	yes	rs7607076
	MSH2	rs4638843			yes
60	MSH3	rs26779			yes
	MSH3	rs27385			yes
	MSH3	rs33015			yes
	MSH3	rs40139			yes
	MSH3	rs836805			yes
	MSH3	rs863221	yes	rs26784
61	MSH6	rs3136245	no	no
62	MSRB1	rs13331553	no	no
	MSRB1	rs732510	no	no
63	near BMP2	rs355527	yes	rs355530
64	near BMP2	rs961253	yes	rs6038483
65	near MYC	rs6983267	no	no
66	near POU5F1B	rs10505477	no	no
67	NFKB1	rs28362491			yes
68	NFKBIA	rs696	yes	rs8904
69	NLRP3	rs35829419			yes
70	NTM	rs6590611			yes
71	ODC1	rs2302615			yes
72	PGR	rs1042838	no	no
	PGR	rs11224575			yes
	PGR	rs11224579	no	no
	PGR	rs529359			yes
	PGR	rs543215	no	no
	PGR	rs563656	yes	rs608995
	PGR	rs613120			yes
	PGR	rs635984	yes	rs660541
73	PTGS1	rs10306155	yes	rs9299281
	PTGS1	rs1213266	no	no
	PTGS1	rs4836885			yes
	PTGS1	rs5789	no	no	yes (MAF < 5%)
74	PTGS2	rs5275	no	no
74	RAF1	rs11923427	yes	rs7643321
	RAF1	rs4684871	no	no
	RAF1	rs904453	yes	rs6795441
	RAF1	rs9809501	no	no
75	RAN	rs14035	no	no
76	RBL1	rs6124509			yes
77	RIPK1	rs2272990	no	no	yes (MAF < 5%)
78	RRM1	rs12806698	no	no
79	SCD	rs7849	no	no
80	SELE	rs5361	no	no
81	SEPN1	rs718391	no	no
82	SFXN5	rs2421099	yes	rs17008608
83	SHMT1	rs1979277	no	no
84	SMAD7	rs4464148	no	no
	SMAD7	rs4939827	no	no
85	SUPT20HL1	rs16983007			yes
86	TECTB	rs11195893	yes	rs7896275
87	TLR2	rs5743704			yes
	TLR2	rs5743708			yes
88	TLR4	rs1554973	no	no
	TLR4	rs5030728			yes
89	TNFAIP3	rs6920220	no	no
90	TXNRD1	rs4964778			yes
91	TXNRD2	rs3788314	no	no
92	TXNRD3	rs11718498	no	no
93	TYMS	rs2853542			yes
94	XPO5	rs11077	no	no
	SNPs that are not included into the study (Please see the Methods section) are highlighted in grey colour
	* these SNPs were identified as proxy by the SNAP database (1) for the SNPs identified in the dbCPCO database (2)
	References
	1. Johnson AD, Handsaker RE, Pulit SL, Nizzari MM, O'Donnell CJ, de Bakker PI. SNAP: a web-based tool for identification and annotation of proxy SNPs using HapMap. Bioinformatics 2008 Dec 15;24(24):2938-2939.
	2. Savas S, Younghusband BH. dbCPCO: A database of genetic markers tested for their predictive and prognostic value in colorectal cancer. Hum Mutat 2010;31(8):901-907.

## Sheet: Additional File-2
Gene	Chr	SNP ID (*instead of)	**Alleles	MAF (%)	Genotype data completeness (%)	Best genetic model-OS	Best genetic model-DFS
SEPN1	1	rs718391	C/G	41.5	100	none	dominant
HS2ST1	1	rs9433110	G/A	5.7	100	none	dominant
DDX20	1	rs197412	T/C	37.8	100	recessive	recessive, co-dominant, ***additive
CRP	1	rs1205	C/T	36.4	100	co-dominant	co-dominant
SELE	1	rs5361	A/C	8.1	100	dominant	none
PTGS2	1	rs5275	T/C	33	100	recessive, co-dominant, ***dominant	co-dominant
MSH2	2	rs7607076 (rs3732183)	A/G	30.2	100	recessive	recessive
MSH6	2	rs3136245	C/T	18.1	99.8	recessive	recessive
SFXN5	2	rs17008608 (rs2421099)	A/G	15.1	100	none	none
DUSP2	2	rs1724120	G/A	41.4	100	dominant	dominant
IL1A	2	rs10496444 (rs3783546)	T/C	32.6	100	recessive	recessive
IL1B	2	rs1143627	T/C	34.6	100	co-dominant	recessive
CXCR2	2	rs7426289 (rs1126579)	C/T	49.7	100	co-dominant	co-dominant
RAF1	3	rs9809501	T/G	10.2	100	dominant	none
RAF1	3	rs7643321 (rs11923427)	A/G	16.5	100	recessive	recessive
RAF1	3	rs4684871	A/G	42.7	99.4	none	none
RAF1	3	rs6795441 (rs904453)	A/G	44.3	99.4	none	recessive
mir26a-1	3	rs7372209	C/T	28.9	100	recessive	recessive
ALCAM	3	rs1157	C/T	20	100	recessive	dominant
CD47	3	rs12695175	A/C	17.3	100	recessive	dominant
TXNRD3	3	rs11718498	G/A	44	100	co-dominant	dominant
CLOCK	4	rs1047354 (rs3749474)	T/C	36.1	100	none	none
CLOCK	4	rs1801260	T/C	25.4	99.8	recessive	recessive
EGF	4	rs4444903	A/G	40	99.8	recessive	recessive
IRF2	4	rs3822118	C/T	32.2	100	recessive	recessive
IRF2	4	rs3756094	G/A	28.9	100	none	none
IRF2	4	rs12504466	T/C	46.7	100	none	co-dominant
IRF2	4	rs7685698 (rs7655800)	T/C	14	100	dominant	dominant
IRF2	4	rs13116389	G/T	16.9	100	none	none
IRF2	4	rs3775582	G/A	11.9	100	none	none
MAP3K1	5	rs11960484 (rs33323)	G/A	38.1	100	none	recessive
MSH3	5	rs26784 (rs863221)	T/C	39.7	100	none	none
IL3	5	rs181781	G/A	9.7	100	dominant	dominant
mir219-1	6	rs213210	T/C	8.3	100	dominant	dominant
XPO5	6	rs11077	A/C	41.9	100	recessive	co-dominant
IFNGR1	6	rs9376267	C/T	23.1	100	recessive	recessive, ***dominant
IFNGR1	6	rs1327474	A/G	47.6	100	dominant	dominant
TNFAIP3	6	rs6920220	G/A	25.2	100	recessive	recessive
MACC1	7	rs1990172	T/G	26.5	100	none	none
EZH2	7	rs3757441	T/C	30.6	100	recessive	recessive, ***dominant
EBF2	8	rs4568629 (rs9942838)	A/G	47.5	100	none	none
ANGPT1	8	rs1954727	C/G	29.6	100	recessive	recessive
near POU5F1B	8	rs10505477	T/C	46.6	100	recessive	recessive
near MYC	8	rs6983267	G/T	45.6	100	recessive	recessive
GWAS associated susceptibility allele	8	rs7014346	G/A	40.4	100	dominant	dominant, ***co-dominant
TLR4	9	rs1554973	T/C	25.3	100	none	recessive
PTGS1	9	rs1213266	G/A	6.9	100	none	none
PTGS1	9	rs9299281 (rs10306155)	A/G	12.5	100	dominant	dominant
HSPA5	9	rs391957	C/T	41.4	100	dominant	dominant
MIR604	10	rs2368392	C/T	25.7	100	recessive	co-dominant
CXCL12	10	rs1801157	G/A	18	97.8	none	recessive
SCD	10	rs7849	A/G	17.3	100	recessive	recessive
MIR608	10	rs4919510	C/G	19.7	100	dominant	co-dominant
TECTB	10	rs7896275 (rs11195893)	A/G	8.5	100	dominant	dominant
CASP7	10	rs2227310	C/G	27.4	100	recessive	recessive
RRM1	11	rs12806698	C/A	28.3	100	recessive, ***co-dominant	recessive, ***co-dominant
CD44	11	rs8193	C/T	33.8	100	recessive	none
MAP3K11	11	rs11227234	G/T	26.7	99.8	none	none
MAP3K11	11	rs1151488	A/G	31.2	100	recessive	co-dominant
PGR	11	rs608995 (rs563656)	A/T	22.1	99.8	recessive, ***co-dominant	co-dominant
PGR	11	rs1042838	G/T	15	100	recessive, ***co-dominant	dominant
PGR	11	rs660541 (rs635984)	G/A	49.4	100	none	co-dominant
PGR	11	rs11224579	C/T	10	100	none	dominant
PGR	11	rs543215	A/G	18.2	100	recessive	recessive
LOC120376 locus	11	rs10749971	A/G	36.5	100	recessive	recessive
MAP3K12	12	rs784567	T/C	49.3	100	***additive, recessive, co-dominant	***additive, co-dominant
LGR5	12	rs17109924	T/C	8.4	100	dominant	none
IGF1	12	rs6220	A/G	27.2	100	recessive	recessive
RAN	12	rs14035	C/T	30.6	100	none	none
GPC5	13	rs553717	G/A	9.4	100	none	none
NFKBIA	14	rs8904 (rs696)	C/T	33.7	100	none	dominant
ESR2	14	rs1152582 (rs1152578)	C/G	47.4	100	dominant	none
ESR2	14	rs8006145	C/A	23.3	100	recessive	dominant
ESR2	14	rs4986938	G/A	34.7	100	recessive	dominant
ESR2	14	rs4365213 (rs12435857)	T/C	41.4	100	none	recessive
ESR2	14	rs8003490 (rs7157428)	G/A	5	100	none	none
ESR2	14	rs1256030	T/C	49.7	100	recessive	recessive
ESR2	14	rs2987983	T/C	26.4	100	recessive	recessive
ESR2	14	rs2978381	T/C	37.8	100	dominant	recessive
ESR2	14	rs3020443	A/C	21.6	100	recessive	recessive
MAP3K9	14	rs17766621	T/C	35.1	100	none	dominant
DICER1	14	rs13078	T/A	18.6	100	recessive	recessive
15q13	15	rs4779584	C/T	20	100	dominant, ***co-dominant	co-dominant
GREM1	15	rs10318	C/T	19.9	99.4	none	dominant
MAP2K1	15	rs17258507 (rs17259670)	A/G	7.7	99.8	none	none
MAP2K1	15	rs8039880	A/G	17.6	100	none	recessive
MSRB1	16	rs13331553	T/C	30	100	none	recessive
MSRB1	16	rs732510	A/G	44.7	100	none	dominant
IRF8	16	rs16882 (rs305083)	A/G	16	100	recessive	recessive
IRF8	16	rs1044873	C/T	38.2	100	recessive	recessive, ***additive, co-dominant
GEMIN4	17	rs7813	T/C	45.4	100	dominant	none
GEMIN4	17	rs2740348	G/C	18.2	100	none	recessive
SHMT1	17	rs1979277	G/A	30.4	100	recessive	recessive
MIR423	17	rs6505162	A/C	44.8	100	recessive	recessive
SMAD7	18	rs4939827	T/C	43.4	100	none	recessive
SMAD7	18	rs4464148	T/C	33.7	100	none	recessive
MIR373	19	rs12983273	C/T	15.6	99.8	dominant	none
near BMP2	20	rs355530 (rs355527)	A/C	34.2	100	dominant	dominant
near BMP2	20	rs6038483 (rs961253)	C/A	37.8	100	recessive, ***additive, co-dominant	recessive, additive, ***co-dominant
GNAS	20	rs7121	C/T	45.4	100	none	recessive
IFNGR2	21	rs2834211	T/C	10.8	100	none	none
TXNRD2	22	rs3788314	G/A	47.5	100	none	none
*The first listed SNP is a proxy SNP (based on the SNAP database [1]) for the SNP within the parenthesis.
**First allele is the major allele in the patient cohort.
***Genetic model with the lowest p-value in the univariate Cox regression analysis
Chr: chromosome; DFS: disease-free survival; MAF: minor allele frequency; OS: overall survival; SNP: single nucleotide polymorphism.
References
1. A.D. Johnson, R.E. Handsaker, S.L. Pulit, et al., "SNAP: a web-based tool for identification and annotation of proxy SNPs using HapMap", Bioinformatics vol. 24(24), pp. 2938-2939, 2008.

## Sheet: Additional File-3
Associated with OS or DFS in at least one study/cohort in literature?	Multivariate analysis results in the referenced study	Reference	Gene symbol	Polymorphism/mutation	rs number	Histology & patient characteristics	Ethnicity	Functional consequences of the polymorphism/mutation
OS only	associated with OS, but not with RFS	Xing J, Myers RE, He X, Qu F, Zhou F, Ma X, Hyslop T, Bao G, Wan S, Yang H, Chen Z. GWAS-identified colorectal cancer susceptibility locus associates with disease prognosis. Eur J Cancer. 2011 Jul;47(11):1699-707.	15q13	susceptibility locus identified by GWAS previously	rs4779584	CRC	Asian	susceptibility locus identified by GWAS previously
	not associated with OS	Hoskins JM, Ong PS, Keku TO, Galanko JA, Martin CF, Coleman CA, Wolfe M, Sandler RS, McLeod HL. Association of eleven common, low-penetrance colorectal cancer susceptibility genetic variants at six risk loci with clinical outcome. PLoS One. 2012;7(7):e41954	GWAS-associated susceptibility allele	NC_000015.9:g.32994756T>C	rs4779584	CRC	Mixed population (African-American=111, Caucasian=472)	GWAS-associated susceptibility allele
no	associated with TTR	Gerger A, Zhang W, Yang D, Bohanes P, Ning Y, Winder T, LaBonte MJ, Wilson PM, Benhaim L, Paez D, El-Khoueiry R, El-Khoueiry A, Kahn M, Lenz HJ. Common cancer stem cell gene variants predict colon cancer recurrence. Clin Cancer Res. 2011 Nov 1;17(21):6934-43.	ALCAM	NM_001627.2:c.*2166G>A	rs1157	high risk stage II and stage III colon cancer patients	Mixed population (Asian=34, African-American=15, Caucasian=123, Hispanic=62)	Predicted to change the transcription factor binding sites at 3'-UTR of the gene by the authors
OS only	associated with OS in all patients, in older patients, in male patients, in patients with lower education level, in patients with lower or higher BMI, in never smoker patients, in never drinker patients, in patients treated with chemotherapy, in colon cancer patients, in patients with poorly or moderately differentiated tumors, and in patients with stage III+IV tumors	Dai J, Wan S, Zhou F, Myers RE, Guo X, Li B, Fu X, Palazzo JP, Dou K, Yang H, Xing J. Genetic polymorphism in a VEGF-independent angiogenesis gene ANGPT1 and overall survival of colorectal cancer patients after surgical resection. PLoS One. 2012;7(4):e34758.	ANGPT1	NM_001199859.1:c.*949G>C	rs1954727	CRC	Asian	n/a
DFS only	not associated with OS or PFS	Kim et al. Prostaglandin synthase 2/cyclooxygenase 2 (PTGS2/COX2) 8473T>C polymorphism associated with prognosis for patients with colorectal cancer treated with capecitabine and oxaliplatin.Cancer Chemother Pharmacol. 2009 Oct;64(5):953-60.	CASP7	Asp255Glu C/G (NP_001218.1:p.Asp255Glu)	rs2227310	recurrent or metastatic CRC patients treated with cepecitabine and oxaliplatin (XELOX)	Asian	predicted benign by PolyPhen
	associated with DFS in all patients, in colon cancer patients, in node-negative patients, and in node-positive patients, but not in rectal cancer patients. associated with DSS in all patients, in colon cancer patients, and in node-positive patients but not in rectal cancer and in node-negative patients .	Chae YS, Kim JG, Sohn SK, Lee SJ, Kang BW, Moon JH, Park JY, Jeon SW, Bae HI, Choi GS, Jun SH. RIPK1 and CASP7 polymorphism as prognostic markers for survival in patients with colorectal cancer after complete resection. J Cancer Res Clin Oncol. 2011 Apr;137(4):705-13.	CASP7	Asp255Glu C/G (NP_001218.1:p.Asp255Glu)	rs2227310	CRC	Asian	predicted benign by PolyPhen
no	associated with TTR	Gerger A, Zhang W, Yang D, Bohanes P, Ning Y, Winder T, LaBonte MJ, Wilson PM, Benhaim L, Paez D, El-Khoueiry R, El-Khoueiry A, Kahn M, Lenz HJ. Common cancer stem cell gene variants predict colon cancer recurrence. Clin Cancer Res. 2011 Nov 1;17(21):6934-43.	CD44	NM_000610.3:c.*438C>T	rs8193	high risk stage II and stage III colon cancer patients	Mixed population (Asian=34, African-American=15, Caucasian=123, Hispanic=62)	Predicted to change the transcription factor binding sites at 3'-UTR of the gene by the authors
no	associated with DSS	Lascorz J, Bevier M, V Schönfels W, Kalthoff H, Aselmann H, Beckmann J, Egberts J, Buch S, Becker T, Schreiber S, Hampe J, Hemminki K, Schafmayer C, Försti A. Association study identifying polymorphisms in CD47 and other extracellular matrix pathway genes as putative prognostic markers for colorectal cancer. Int J Colorectal Dis. 2013 Feb;28(2):173-81.	CD47	NM_001777.3:c.785-230T>G	rs12695175	sporadic CRC	Caucasian	n/a
OS only	associated with OS in all patients, but not in patients treated with adjuvant chemotherapy or not treated with chemotherapy. not associated with RFS	Zhou F, He X, Liu H, Zhu Y, Jin T, Chen C, Qu F, Li Y, Bao G, Chen Z, Xing J. Functional polymorphisms of circadian positive feedback regulation genes and clinical outcome of Chinese patients with resected colorectal cancer. Cancer. 2012 Feb 15;118(4):937-46.	CLOCK	NM_004898.2:c.*213T>C	rs1801260	CRC	Asian	variant allele does not affect gene expression (Zhou F, He X, Liu H, Zhu Y, Jin T, Chen C, Qu F, Li Y, Bao G, Chen Z, Xing J. Functional polymorphisms of circadian positive feedback regulation genes and clinical outcome of Chinese patients with resected colorectal cancer. Cancer. 2012 Feb 15;118(4):937-46.)
OS only	associated with OS in all patients, in patients not treated with adjuvant chemotherapy, and in patients treated with adjuvant chemotherapy. not associated with RFS	Zhou F, He X, Liu H, Zhu Y, Jin T, Chen C, Qu F, Li Y, Bao G, Chen Z, Xing J. Functional polymorphisms of circadian positive feedback regulation genes and clinical outcome of Chinese patients with resected colorectal cancer. Cancer. 2012 Feb 15;118(4):937-46.	CLOCK	NM_004898.2:c.*897G>A	rs3749474	CRC	Asian	variant allele reduces gene expression (Zhou F, He X, Liu H, Zhu Y, Jin T, Chen C, Qu F, Li Y, Bao G, Chen Z, Xing J. Functional polymorphisms of circadian positive feedback regulation genes and clinical outcome of Chinese patients with resected colorectal cancer. Cancer. 2012 Feb 15;118(4):937-46.)
OS only	in colon cancer patients associated with OS but not with DSS. in rectal cancer patients not associated with OS and DFS.	Slattery ML, Curtin K, Poole EM, Duggan DJ, Samowitz WS, Peters U, Caan BJ, Potter JD, Ulrich CM. Genetic variation in C-reactive protein in relation to colon and rectal cancer risk and survival. Int J Cancer. 2011 Jun 1;128(11):2726-34.	CRP	tagSNP (NM_000567.2:c.*1082G>A)	rs1205	CRC	Mixed population (USA)	n/a
DFS only	associated with DFS	Changet al. SDF-1alpha G801A Polymorphism Predicts Lymph Node Metastasis in Stage T3 Colorectal Cancer. Ann Surg Oncol. 2009 Aug;16(8):2323-3	CXCL12	G801A at the 3'-UTR G/A (also called G12197A) (NM_000609.4:c.*519G>A)	rs1801157	primary T3 CRC patients with or without lymph node metastasis	Asian	A allele is associated with higher mRNA levels in vitro (Chang SC, Lin PC, Yang SH, Wang HS, Li AF, Lin JK.SDF-1alpha G801A Polymorphism Predicts Lymph Node Metastasis in Stage T3 Colorectal Cancer. Ann Surg Oncol. 2009 Aug;16(8):2323-30.)
OS only	associated with OS in rectal cancer patients after Holm's correction for multiple testing, but not in colon cancer patients	Bondurant KL, Lundgreen A, Herrick JS, Kadlubar S, Wolff RK, Slattery ML. Interleukin genes and associations with colon and rectal cancer risk and overall survival. Int J Cancer. 2013 Feb 15;132(4):905-15.	CXCR2	NM_001168298.1:c.*127T>C	rs1126579	CRC	Mixed population? (USA)	n/a
no	in stage III patients associated with RFS in the training set after correction for multiple testing but not in the replication set	Lin M, Gu J, Eng C, Ellis LM, Hildebrandt MA, Lin J, Huang M, Calin GA, Wang D, Dubois RN, Hawk ET, Wu X. Genetic polymorphisms in MicroRNA-related genes as predictors of clinical outcomes in colorectal adenocarcinoma patients. Clin Cancer Res. 2012 Jul 15;18(14):3982-91.	DDX20	NP_009135.4:p.Ile636Thr T/C	rs197412	CRC patients treated with 5-FU based chemotherapy	Mixed population (training set; Caucasian=611, African-American=62, other=56; replication set; Caucasian=295, African-American=22, other=39)	n/a
	not associated with PFS and OS.	Lee HC, Kim JG, Chae YS, Sohn SK, Kang BW, Moon JH, Jeon SW, Lee MH, Lim KH, Park JY, Choi GS, Jun SH. Prognostic impact of microRNA-related gene polymorphisms on survival of patients with colorectal cancer. J Cancer Res Clin Oncol. 2010 Jul;136(7):1073-8.	DDX20	Thr636Ile T/C	rs197412	CRC	Asian	predicted to be benign by PolyPhen
OS only	in stage IV patients associated with RFS in the training set after correction for multiple testing but not in the replication set; associated with OS in stage IV patients in the training set after correction for multiple testing but not in the replication set	Lin M, Gu J, Eng C, Ellis LM, Hildebrandt MA, Lin J, Huang M, Calin GA, Wang D, Dubois RN, Hawk ET, Wu X. Genetic polymorphisms in MicroRNA-related genes as predictors of clinical outcomes in colorectal adenocarcinoma patients. Clin Cancer Res. 2012 Jul 15;18(14):3982-91.	DICER1	NM_001195573.1:c.*204T>A	rs13078	CRC patients treated with 5-FU based chemotherapy	Mixed population (training set; Caucasian=611, African-American=62, other=56; replication set; Caucasian=295, African-American=22, other=39)	n/a
	not associated with PFS and OS.	Lee HC, Kim JG, Chae YS, Sohn SK, Kang BW, Moon JH, Jeon SW, Lee MH, Lim KH, Park JY, Choi GS, Jun SH. Prognostic impact of microRNA-related gene polymorphisms on survival of patients with colorectal cancer. J Cancer Res Clin Oncol. 2010 Jul;136(7):1073-8.	DICER1	A/T ( NM_030621.3:c.*88T>A)	rs13078	CRC	Asian	n/a
OS only	associated with OS in colon cancer patients	Slattery ML, Lundgreen A, Wolff RK. MAP kinase genes and colon and rectal cancer. Carcinogenesis. 2012 Dec;33(12):2398-408.	DUSP2	NM_004418.3:c.*231A>G	rs1724120	CRC	Mixed population (colon cancer patients: Caucasian: 1428, Hispanic=59, Black=68, rectal cancer patients: Caucasian=625, Hispanic=61, Black=29, Asian=39)	n/a
OS only	in stage II discovery cohort patients, associated with OS but not in the stage II replication cohort patients	Lin M, Eng C, Hawk ET, Huang M, Lin J, Gu J, Ellis LM, Wu X. Identification of polymorphisms in ultraconserved elements associated with clinical outcomes in locally advanced colorectal adenocarcinoma. Cancer. 2012 Dec 15;118(24):6188-98.	EBF2	NM_022659.3:c.1009+2222A>G	rs9942838	stage II-III CRC patients treated with 5-fluoropyrimidine-based adjuvant chemotherapy	Mixed population	n/a
OS only	associated with OS, but not when corrected for multiple testing	Gerger A, El-Khoueiry A, Zhang W, Yang D, Singh H, Bohanes P, Ning Y, Winder T, Labonte MJ, Wilson PM, Benhaim L, Paez D, El-Khoueiry R, Absenger G, Lenz HJ. Pharmacogenetic angiogenesis profiling for first-line Bevacizumab plus oxaliplatin-based chemotherapy in patients with metastatic colorectal cancer. Clin Cancer Res. 2011 Sep 1;17(17):5783-92.	EGF	A61G in 5'-UTR (NM_001963.3:c.-382A>G)	rs4444903	metastatic CRC patients treated with first-line bevacizumab+oxaliplatin-based chemotherapy	Mixed population (African-American=5, Asian=27, Caucasian=65, Hispanic=35)	G allele it is associated with higher serum levels of EGF (Bhowmick et al. A functional polymorphism in the EGF gene is found with increased frequency in glioblastoma multiforme patients and is associated with more aggressive disease. Cancer Res. 2004 Feb 15;64(4):1220-3.)
	not associated with PFS, associated with OS	Grazianoet al. Pharmacogenetic profiling for cetuximab plus irinotecan therapy in patients with refractory advanced colorectal cancer. J Clin Oncol. 2008 Mar 20;26(9):1427-34.	EGF	A61G in 5'-UTR (NM_001963.3:c.-382A>G)	rs4444903	metastatic CRC patients previously treated with FOLFOX regimen and now being treated with cetuximab-irinotecan	Caucasian	G allele it is associated with higher serum levels of EGF (Bhowmick et al. A functional polymorphism in the EGF gene is found with increased frequency in glioblastoma multiforme patients and is associated with more aggressive disease. Cancer Res. 2004 Feb 15;64(4):1220-3.)
	not associated with PFS.	Pander J, Gelderblom H, Antonini NF, Tol J, van Krieken JH, van der Straaten T, Punt CJ, Guchelaar HJ. Correlation of FCGR3A and EGFR germline polymorphisms with the efficacy of cetuximab in KRAS wild-type metastatic colorectal cancer. Eur J Cancer. 2010 Jul;46(10):1829-34	EGF	A61G in 5'-UTR (NM_001963.3:c.-382A>G)	rs4444903	metastatic CRC patients with intact KRAS gene and treated with chemotherapy and bevacizumab alone or in addition with cetuximab	Caucasian	G allele it is associated with higher serum levels of EGF (Bhowmick et al. A functional polymorphism in the EGF gene is found with increased frequency in glioblastoma multiforme patients and is associated with more aggressive disease. Cancer Res. 2004 Feb 15;64(4):1220-3.)
OS only	associated with DSS and OS after FDR correction in the discovery cohort but not in the replication cohort	Passarelli MN, Phipps AI, Potter JD, Makar KW, Coghill AE, Wernli KJ, White E, Chan AT, Hutter CM, Peters U, Newcomb PA. Common single-nucleotide polymorphisms in the estrogen receptor β promoter are associated with colorectal cancer survival in postmenopausal women. Cancer Res. 2013 Jan 15;73(2):767-75.	ESR2	NM_001040275.1:c.1407-2705A>G	rs1152578	female CRC patients	Mixed population (discovery cohort=674 Caucasian+55 non-Caucasian), replication cohort=1729 Caucasian)	n/a
OS only	associated with DSS and OS after FDR correction in the discovery cohort but not in the replication cohort	Passarelli MN, Phipps AI, Potter JD, Makar KW, Coghill AE, Wernli KJ, White E, Chan AT, Hutter CM, Peters U, Newcomb PA. Common single-nucleotide polymorphisms in the estrogen receptor β promoter are associated with colorectal cancer survival in postmenopausal women. Cancer Res. 2013 Jan 15;73(2):767-75.	ESR2	NM_001040275.1:c.1091+419C>T	rs12435857	female CRC patients	Mixed population (discovery cohort=674 Caucasian+55 non-Caucasian), replication cohort=1729 Caucasian)	n/a
no	associated with DSS but not with OS after FDR correction in the discovery cohort, not associated in the replication cohort	Passarelli MN, Phipps AI, Potter JD, Makar KW, Coghill AE, Wernli KJ, White E, Chan AT, Hutter CM, Peters U, Newcomb PA. Common single-nucleotide polymorphisms in the estrogen receptor β promoter are associated with colorectal cancer survival in postmenopausal women. Cancer Res. 2013 Jan 15;73(2):767-75.	ESR2	NM_001040275.1:c.363-299T>C	rs1256030	female CRC patients	Mixed population (discovery cohort=674 Caucasian+55 non-Caucasian), replication cohort=1729 Caucasian)	n/a
OS only	associated with OS but not DSS after FDR correction in the discovery cohort and in the replication cohort associated with OS and DSS	Passarelli MN, Phipps AI, Potter JD, Makar KW, Coghill AE, Wernli KJ, White E, Chan AT, Hutter CM, Peters U, Newcomb PA. Common single-nucleotide polymorphisms in the estrogen receptor β promoter are associated with colorectal cancer survival in postmenopausal women. Cancer Res. 2013 Jan 15;73(2):767-75.	ESR2	NM_001040276.1:c.-90-16859A>G	rs2978381	female CRC patients	Mixed population (discovery cohort=674 Caucasian+55 non-Caucasian), replication cohort=1729 Caucasian)	n/a
OS only	associated with DSS and OS in the discovery cohort after FDR correction and in the replication cohort	Passarelli MN, Phipps AI, Potter JD, Makar KW, Coghill AE, Wernli KJ, White E, Chan AT, Hutter CM, Peters U, Newcomb PA. Common single-nucleotide polymorphisms in the estrogen receptor β promoter are associated with colorectal cancer survival in postmenopausal women. Cancer Res. 2013 Jan 15;73(2):767-75.	ESR2	NM_001040276.1:c.-90-13860T>C	rs2987983	female CRC patients	Mixed population (discovery cohort=674 Caucasian+55 non-Caucasian), replication cohort=1729 Caucasian)	n/a
OS only	associated with DSS and OS in the discovery cohort after FDR correction and in the replication cohort	Passarelli MN, Phipps AI, Potter JD, Makar KW, Coghill AE, Wernli KJ, White E, Chan AT, Hutter CM, Peters U, Newcomb PA. Common single-nucleotide polymorphisms in the estrogen receptor β promoter are associated with colorectal cancer survival in postmenopausal women. Cancer Res. 2013 Jan 15;73(2):767-75.	ESR2	NM_001040276.1:c.-91+12276A>C	rs3020443	female CRC patients	Mixed population (discovery cohort=674 Caucasian+55 non-Caucasian), replication cohort=1729 Caucasian)	n/a
OS only	associated with DSS and OS after FDR correction in the discovery cohort but not in the replication cohort	Passarelli MN, Phipps AI, Potter JD, Makar KW, Coghill AE, Wernli KJ, White E, Chan AT, Hutter CM, Peters U, Newcomb PA. Common single-nucleotide polymorphisms in the estrogen receptor β promoter are associated with colorectal cancer survival in postmenopausal women. Cancer Res. 2013 Jan 15;73(2):767-75.	ESR2	NM_001040275.1:c.1406+1872G>A	rs4986938	female CRC patients	Mixed population (discovery cohort=674 Caucasian+55 non-Caucasian), replication cohort=1729 Caucasian)	n/a
OS only	associated with OS but not DSS after FDR correction in the discovery cohort; not associated in the replication cohort	Passarelli MN, Phipps AI, Potter JD, Makar KW, Coghill AE, Wernli KJ, White E, Chan AT, Hutter CM, Peters U, Newcomb PA. Common single-nucleotide polymorphisms in the estrogen receptor β promoter are associated with colorectal cancer survival in postmenopausal women. Cancer Res. 2013 Jan 15;73(2):767-75.	ESR2	NM_001040275.1:c.1092-2720C>T	rs7157428	female CRC patients	Mixed population (discovery cohort=674 Caucasian+55 non-Caucasian), replication cohort=1729 Caucasian)	n/a
OS only	associated with DSS and OS after FDR correction in the discovery cohort but not in the replication cohort	Passarelli MN, Phipps AI, Potter JD, Makar KW, Coghill AE, Wernli KJ, White E, Chan AT, Hutter CM, Peters U, Newcomb PA. Common single-nucleotide polymorphisms in the estrogen receptor β promoter are associated with colorectal cancer survival in postmenopausal women. Cancer Res. 2013 Jan 15;73(2):767-75.	ESR2	NM_001040275.1:c.1406+2238G>T	rs8006145	female CRC patients	Mixed population (discovery cohort=674 Caucasian+55 non-Caucasian), replication cohort=1729 Caucasian)	n/a
OS only	associated with OS and PFS	Crea F, Fornaro L, Paolicchi E, Masi G, Frumento P, Loupakis F, Salvatore L, Cremolini C, Schirripa M, Graziano F, Ronzoni M, Ricci V, Farrar WL, Falcone A, Danesi R. An EZH2 polymorphism is associated with clinical outcome in metastatic colorectal cancer patients. Ann Oncol. 2012 May;23(5):1207-13.	EZH2	NM_001203247.1:c.626-394G>A	rs3757441	metastatic CRC patients treated with FOLFIRI+bevacizumab	Caucasian	n/a
no	in stage III patients associated with RFS in the training set after correction for multiple testing by FDR, but not in the replication set	Lin M, Gu J, Eng C, Ellis LM, Hildebrandt MA, Lin J, Huang M, Calin GA, Wang D, Dubois RN, Hawk ET, Wu X. Genetic polymorphisms in MicroRNA-related genes as predictors of clinical outcomes in colorectal adenocarcinoma patients. Clin Cancer Res. 2012 Jul 15;18(14):3982-91.	GEMIN4	NP_056536.2:p.Gln450Glu C/G	rs2740348	CRC patients treated with 5-FU based chemotherapy	Mixed population (training set; Caucasian=611, African-American=62, other=56; replication set; Caucasian=295, African-American=22, other=39)	n/a
	not associated with PFS and OS.	Lee HC, Kim JG, Chae YS, Sohn SK, Kang BW, Moon JH, Jeon SW, Lee MH, Lim KH, Park JY, Choi GS, Jun SH. Prognostic impact of microRNA-related gene polymorphisms on survival of patients with colorectal cancer. J Cancer Res Clin Oncol. 2010 Jul;136(7):1073-8.	GEMIN4	Gln450Glu G/C	rs2740348	CRC	Asian	predicted to be benign by PolyPhen
no	in stage III patients associated with RFS in the training set after correction for multiple testing by FDR but not in the replication set	Lin M, Gu J, Eng C, Ellis LM, Hildebrandt MA, Lin J, Huang M, Calin GA, Wang D, Dubois RN, Hawk ET, Wu X. Genetic polymorphisms in MicroRNA-related genes as predictors of clinical outcomes in colorectal adenocarcinoma patients. Clin Cancer Res. 2012 Jul 15;18(14):3982-91.	GEMIN4	NP_056536.2:p.Arg1033Cys C/T	rs7813	CRC patients treated with 5-FU based chemotherapy	Mixed population (training set; Caucasian=611, African-American=62, other=56; replication set; Caucasian=295, African-American=22, other=39)	n/a
	not associated with PFS and OS.	Lee HC, Kim JG, Chae YS, Sohn SK, Kang BW, Moon JH, Jeon SW, Lee MH, Lim KH, Park JY, Choi GS, Jun SH. Prognostic impact of microRNA-related gene polymorphisms on survival of patients with colorectal cancer. J Cancer Res Clin Oncol. 2010 Jul;136(7):1073-8.	GEMIN4	Cys1033Arg T/C	rs7813	CRC	Asian	predicted to be possibly damaging by PolyPhen
OS only	associated with OS	Frey et al. GNAS1 T393C polymorphism and survival in patients with sporadic colorectal cancer. Clin Cancer Res. 2005 Jul 15;11(14):5071-7.	GNAS	Ile131Ile T/C (NM_000516.4:c.393C>T)	rs7121	sporadic CRC	Caucasian	TT has an increased gene expression (Frey et al. The T393C polymorphism of the G alpha s gene (GNAS1) is a novel prognostic marker in bladder cancer. Cancer Epidemiol Biomarkers Prev. 2005 Apr;14(4):871-7.)
no	associated with risk of recurrence	Kim JC, Kim SY, Cho DH, Roh SA, Choi EY, Jo YK, Jung SH, Na YS, Kim TW, Kim YS. Genome-wide identification of chemosensitive single nucleotide polymorphism markers in colorectal cancers. Cancer Sci. 2010 Apr;101(4):1007-13.	GPC5	Ala155Val C/T (NP_004457.1:p.Ala155Val)	rs553717	stage II and III CRC patients treated with fluoropyrimidine-based regimens	Asian	predicted to be benign by PolyPhen
no	associated with increased risk of recurrence	Dai J, Gu J, Huang M, Eng C, Kopetz ES, Ellis LM, Hawk E, Wu X. GWAS-identified colorectal cancer susceptibility loci associated with clinical outcomes. Carcinogenesis. 2012 Jul;33(7):1327-31	GREM1	NM_001191322.1:c.*2533C>T	rs10318	stage II and III CRC patients undergone surgery and treated with 5-FU-based adjuvant chemotherapy	Mixed population (African-American=22, Caucasian=240, other=23)	n/a
	not associated with OS	Hoskins JM, Ong PS, Keku TO, Galanko JA, Martin CF, Coleman CA, Wolfe M, Sandler RS, McLeod HL. Association of eleven common, low-penetrance colorectal cancer susceptibility genetic variants at six risk loci with clinical outcome. PLoS One. 2012;7(7):e41954	GWAS-associated susceptibility allele	NM_001191322.1:c.*2533C>T	rs10318	CRC	Mixed population (African-American=111, Caucasian=472)	GWAS-associated susceptibility allele
OS only	associated with OS	Hoskins JM, Ong PS, Keku TO, Galanko JA, Martin CF, Coleman CA, Wolfe M, Sandler RS, McLeod HL. Association of eleven common, low-penetrance colorectal cancer susceptibility genetic variants at six risk loci with clinical outcome. PLoS One. 2012;7(7):e41954	GWAS-associated susceptibility allele	NC_000008.10:g.128424792A>G	rs7014346	CRC	Mixed population (African-American=111, Caucasian=472)	GWAS-associated susceptibility allele
	not associated with RFS and OS	Xing J, Myers RE, He X, Qu F, Zhou F, Ma X, Hyslop T, Bao G, Wan S, Yang H, Chen Z. GWAS-identified colorectal cancer susceptibility locus associates with disease prognosis. Eur J Cancer. 2011 Jul;47(11):1699-707.	8q24	susceptibility locus identified by GWAS previously	rs7014346	CRC	Asian	susceptibility locus identified by GWAS previously
OS only	associated with OS in colon cancer patients even after FDR correction	Slattery ML, Lundgreen A, Welbourn B, Corcoran C, Wolff RK. Genetic variation in selenoprotein genes, lifestyle, and risk of colon and rectal cancer. PLoS One. 2012;7(5):e37312.	HS2ST1	NM_001134492.1:c.-385-1026G>A	rs9433110	CRC	Mixed population? (USA)	n/a
no	associated with TTR	Winder T, Bohanes P, Zhang W, Yang D, Power DG, Ning Y, Gerger A, Wilson PM, Tang LH, Shah M, Lee AS, Lenz HJ. GRP78 promoter polymorphism rs391957 as potential predictor for clinical outcome in gastric and colorectal cancer patients. Ann Oncol. 2011 Nov;22(11):2431-9.	HSPA5	NG_027761.1:g.4643A>G in promoter	rs391957	stage II and III CRC patients	Mixed population (White=123, African-American=15, Asian=34, Hispanic=62)	n/a
no	associated with DSS in colon cancer patients	Slattery ML, Lundgreen A, Bondurant KL, Wolff RK. Interferon-signaling pathway: associations with colon and rectal cancer risk and subsequent survival. Carcinogenesis. 2011 Nov;32(11):1660-7.	IFNGR1	tagSNP NG_007394.1:g.4493G>A	rs1327474	CRC	Mixed population (White=1428 colon and 625 rectal; Hispanic=59 colon and 61 rectal; Black=68 colon and 29 rectal; Asian=0 colon and 39 rectal)	n/a
no	associated with DSS in colon cancer patients	Slattery ML, Lundgreen A, Bondurant KL, Wolff RK. Interferon-signaling pathway: associations with colon and rectal cancer risk and subsequent survival. Carcinogenesis. 2011 Nov;32(11):1660-7.	IFNGR1	tagSNP NM_000416.2:c.86-2817G>A	rs9376267	CRC	Mixed population (White=1428 colon and 625 rectal; Hispanic=59 colon and 61 rectal; Black=68 colon and 29 rectal; Asian=0 colon and 39 rectal)	n/a
no	associated with DSS in colon cancer patients but not when corrected for multiple testing	Slattery ML, Lundgreen A, Bondurant KL, Wolff RK. Interferon-signaling pathway: associations with colon and rectal cancer risk and subsequent survival. Carcinogenesis. 2011 Nov;32(11):1660-7.	IFNGR2	tagSNP NM_005534.3:c.206+2481T>C	rs2834211	CRC	Mixed population (White=1428 colon and 625 rectal; Hispanic=59 colon and 61 rectal; Black=68 colon and 29 rectal; Asian=0 colon and 39 rectal)	n/a
OS only	associated with OS but not when corrected for multiple testing	Gerger A, El-Khoueiry A, Zhang W, Yang D, Singh H, Bohanes P, Ning Y, Winder T, Labonte MJ, Wilson PM, Benhaim L, Paez D, El-Khoueiry R, Absenger G, Lenz HJ. Pharmacogenetic angiogenesis profiling for first-line Bevacizumab plus oxaliplatin-based chemotherapy in patients with metastatic colorectal cancer. Clin Cancer Res. 2011 Sep 1;17(17):5783-92.	IGF1	NM_001111284.1:c.*1770 A/C/G/T	rs6220	metastatic CRC patients treated with first-line bevacizumab+oxaliplatin-based chemotherapy	Mixed population (African-American=5, Asian=27, Caucasian=65, Hispanic=35)	Associated with IGF1 levels (Verheus M, McKay JD, Kaaks R, Canzian F, Biessy C, Johansson M, Grobbee DE, Peeters PH, van Gils CH. Common genetic variation in the IGF-1 gene, serum IGF-I levels and breast density. Breast Cancer Res Treat. 2008 Nov;112(1):109-22. )
OS only	associated with OS after Holm's correction for multiple testing in rectal cancer patients, but not in colon cancer patients	Bondurant KL, Lundgreen A, Herrick JS, Kadlubar S, Wolff RK, Slattery ML. Interleukin genes and associations with colon and rectal cancer risk and overall survival. Int J Cancer. 2013 Feb 15;132(4):905-15.	IL1A	NM_000575.3:c.615+734C>G	rs3783546	CRC	Mixed population? (USA)	n/a
OS only	associated with OS after Holm's correction for multiple testing in colon cancer patients, but not in rectal cancer patients	Bondurant KL, Lundgreen A, Herrick JS, Kadlubar S, Wolff RK, Slattery ML. Interleukin genes and associations with colon and rectal cancer risk and overall survival. Int J Cancer. 2013 Feb 15;132(4):905-15.	IL1B	NM_000576.2:c.-87-31C>T	rs1143627	CRC	Mixed population? (USA)	n/a
OS only	associated with OS after Holm's correction for multiple testing in rectal cancer patients, but not in colon cancer patients	Bondurant KL, Lundgreen A, Herrick JS, Kadlubar S, Wolff RK, Slattery ML. Interleukin genes and associations with colon and rectal cancer risk and overall survival. Int J Cancer. 2013 Feb 15;132(4):905-15.	IL3	NM_000588.3:c.-53-1232G>A	rs181781	CRC	Mixed population? (USA)	n/a
no	associated with DSS in colon cancer patients but not when corrected for multiple testing	Slattery ML, Lundgreen A, Bondurant KL, Wolff RK. Interferon-signaling pathway: associations with colon and rectal cancer risk and subsequent survival. Carcinogenesis. 2011 Nov;32(11):1660-7.	IRF2	tagSNP NM_002199.3:c.-6-3575A>G	rs12504466	CRC	Mixed population (White=1428 colon and 625 rectal; Hispanic=59 colon and 61 rectal; Black=68 colon and 29 rectal; Asian=0 colon and 39 rectal)	n/a
no	associated with DSS in colon cancer patients but not when corrected for multiple testing	Slattery ML, Lundgreen A, Bondurant KL, Wolff RK. Interferon-signaling pathway: associations with colon and rectal cancer risk and subsequent survival. Carcinogenesis. 2011 Nov;32(11):1660-7.	IRF2	tagSNP NM_002199.3:c.-6-9192C>A	rs13116389	CRC	Mixed population (White=1428 colon and 625 rectal; Hispanic=59 colon and 61 rectal; Black=68 colon and 29 rectal; Asian=0 colon and 39 rectal)	n/a
no	associated with DSS in rectal cancer patients after correction for multiple testing	Slattery ML, Lundgreen A, Bondurant KL, Wolff RK. Interferon-signaling pathway: associations with colon and rectal cancer risk and subsequent survival. Carcinogenesis. 2011 Nov;32(11):1660-7.	IRF2	tagSNP NM_002199.3:c.-6-710T>C	rs3756094	CRC	Mixed population (White=1428 colon and 625 rectal; Hispanic=59 colon and 61 rectal; Black=68 colon and 29 rectal; Asian=0 colon and 39 rectal)	n/a
no	associated with DSS in colon cancer patients but not when corrected for multiple testing	Slattery ML, Lundgreen A, Bondurant KL, Wolff RK. Interferon-signaling pathway: associations with colon and rectal cancer risk and subsequent survival. Carcinogenesis. 2011 Nov;32(11):1660-7.	IRF2	tagSNP NM_002199.3:c.-7+7046C>T	rs3775582	CRC	Mixed population (White=1428 colon and 625 rectal; Hispanic=59 colon and 61 rectal; Black=68 colon and 29 rectal; Asian=0 colon and 39 rectal)	n/a
no	associated with DSS in rectal cancer patients but not when corrected for multiple testing	Slattery ML, Lundgreen A, Bondurant KL, Wolff RK. Interferon-signaling pathway: associations with colon and rectal cancer risk and subsequent survival. Carcinogenesis. 2011 Nov;32(11):1660-7.	IRF2	tagSNP NM_002199.3:c.-6-353G>A	rs3822118	CRC	Mixed population (White=1428 colon and 625 rectal; Hispanic=59 colon and 61 rectal; Black=68 colon and 29 rectal; Asian=0 colon and 39 rectal)	n/a
no	associated with DSS in colon cancer patients but not when corrected for multiple testing	Slattery ML, Lundgreen A, Bondurant KL, Wolff RK. Interferon-signaling pathway: associations with colon and rectal cancer risk and subsequent survival. Carcinogenesis. 2011 Nov;32(11):1660-7.	IRF2	tagSNP	rs7655800	CRC	Mixed population (White=1428 colon and 625 rectal; Hispanic=59 colon and 61 rectal; Black=68 colon and 29 rectal; Asian=0 colon and 39 rectal)	n/a
no	associated with DSS in colon cancer patients but not when corrected for multiple testing	Slattery ML, Lundgreen A, Bondurant KL, Wolff RK. Interferon-signaling pathway: associations with colon and rectal cancer risk and subsequent survival. Carcinogenesis. 2011 Nov;32(11):1660-7.	IRF8	tagSNP NM_002163.2:c.*783C>T	rs1044873	CRC	Mixed population (White=1428 colon and 625 rectal; Hispanic=59 colon and 61 rectal; Black=68 colon and 29 rectal; Asian=0 colon and 39 rectal)	n/a
no	associated with DSS in colon cancer patients but not when corrected for multiple testing	Slattery ML, Lundgreen A, Bondurant KL, Wolff RK. Interferon-signaling pathway: associations with colon and rectal cancer risk and subsequent survival. Carcinogenesis. 2011 Nov;32(11):1660-7.	IRF8	tagSNP NM_002163.2:c.-1-743A>G	rs305083	CRC	Mixed population (White=1428 colon and 625 rectal; Hispanic=59 colon and 61 rectal; Black=68 colon and 29 rectal; Asian=0 colon and 39 rectal)	n/a
no	associated with TTR	Gerger A, Zhang W, Yang D, Bohanes P, Ning Y, Winder T, LaBonte MJ, Wilson PM, Benhaim L, Paez D, El-Khoueiry R, El-Khoueiry A, Kahn M, Lenz HJ. Common cancer stem cell gene variants predict colon cancer recurrence. Clin Cancer Res. 2011 Nov 1;17(21):6934-43.	LGR5	NP_003658.1:p.Val666Ala T/C	rs17109924	high risk stage II and stage III colon cancer patients	Mixed population (Asian=34, African-American=15, Caucasian=123, Hispanic=62)	Predicted to change the gene splicing regulation by the authors
no	in stage III patients associated with risk of recurrence	Dai J, Gu J, Huang M, Eng C, Kopetz ES, Ellis LM, Hawk E, Wu X. GWAS-identified colorectal cancer susceptibility loci associated with clinical outcomes. Carcinogenesis. 2012 Jul;33(7):1327-31	LOC120376 locus	NC_000011.9:g.111189158A>G	rs10749971	stage II and III CRC patients undergone surgery and treated with 5-FU-based adjuvant chemotherapy	Mixed population (African-American=22, Caucasian=240, other=23)	n/a
OS only	associated with OS	Lang AH, Geller-Rhomberg S, Winder T, Stark N, Gasser K, Hartmann B, Kohler B, Grizelj I, Drexel H, Muendlein A. A common variant of the MACC1 gene is significantly associated with overall survival in colorectal cancer patients. BMC Cancer. 2012 Jan 17;12:20.	MACC1	NM_182762.3:c.-152-113T>G	rs1990172	CRC	Caucasian	n/a
OS only	associated with OS in rectal cancer patients	Slattery ML, Lundgreen A, Wolff RK. MAP kinase genes and colon and rectal cancer. Carcinogenesis. 2012 Dec;33(12):2398-408.	MAP2K1	NM_002755.3:c.81-18425A>G	rs17259670	CRC	Mixed population (colon cancer patients: Caucasian: 1428, Hispanic=59, Black=68, rectal cancer patients: Caucasian=625, Hispanic=61, Black=29, Asian=39)	n/a
OS only	associated with OS in rectal cancer patients	Slattery ML, Lundgreen A, Wolff RK. MAP kinase genes and colon and rectal cancer. Carcinogenesis. 2012 Dec;33(12):2398-408.	MAP2K1	NM_002755.3:c.569-13751A>G	rs8039880	CRC	Mixed population (colon cancer patients: Caucasian: 1428, Hispanic=59, Black=68, rectal cancer patients: Caucasian=625, Hispanic=61, Black=29, Asian=39)	n/a
OS only	associated with OS in colon cancer patients	Slattery ML, Lundgreen A, Wolff RK. MAP kinase genes and colon and rectal cancer. Carcinogenesis. 2012 Dec;33(12):2398-408.	MAP3K1	NM_005921.1:c.2087+638C>G	rs33323	CRC	Mixed population (colon cancer patients: Caucasian: 1428, Hispanic=59, Black=68, rectal cancer patients: Caucasian=625, Hispanic=61, Black=29, Asian=39)	n/a
OS only	associated with OS in colon cancer patients	Slattery ML, Lundgreen A, Wolff RK. MAP kinase genes and colon and rectal cancer. Carcinogenesis. 2012 Dec;33(12):2398-408.	MAP3K11	NM_002419.3:c.*591C>A	rs11227234	CRC	Mixed population (colon cancer patients: Caucasian: 1428, Hispanic=59, Black=68, rectal cancer patients: Caucasian=625, Hispanic=61, Black=29, Asian=39)	n/a
OS only	associated with OS in colon cancer patients	Slattery ML, Lundgreen A, Wolff RK. MAP kinase genes and colon and rectal cancer. Carcinogenesis. 2012 Dec;33(12):2398-408.	MAP3K11	NM_002419.3:c.1831+1628A>G	rs1151488	CRC	Mixed population (colon cancer patients: Caucasian: 1428, Hispanic=59, Black=68, rectal cancer patients: Caucasian=625, Hispanic=61, Black=29, Asian=39)	n/a
OS only	in stage IV patients associated with OS in the training set after correction for multiple testing by FDR but not in the replication set	Lin M, Gu J, Eng C, Ellis LM, Hildebrandt MA, Lin J, Huang M, Calin GA, Wang D, Dubois RN, Hawk ET, Wu X. Genetic polymorphisms in MicroRNA-related genes as predictors of clinical outcomes in colorectal adenocarcinoma patients. Clin Cancer Res. 2012 Jul 15;18(14):3982-91.	MAP3K12	NM_001193511.1:c.-1292C>T	rs784567	CRC patients treated with 5-FU based chemotherapy	Mixed population (training set; Caucasian=611, African-American=62, other=56; replication set; Caucasian=295, African-American=22, other=39)	n/a
	not associated with PFS and OS.	Lee HC, Kim JG, Chae YS, Sohn SK, Kang BW, Moon JH, Jeon SW, Lee MH, Lim KH, Park JY, Choi GS, Jun SH. Prognostic impact of microRNA-related gene polymorphisms on survival of patients with colorectal cancer. J Cancer Res Clin Oncol. 2010 Jul;136(7):1073-8.	TARBP2	C/T (NT_029419.12:g.16037771G>A)	rs784567	CRC	Asian	n/a
OS only	associated with OS in colon cancer patients and in rectal cancer patients	Slattery ML, Lundgreen A, Wolff RK. MAP kinase genes and colon and rectal cancer. Carcinogenesis. 2012 Dec;33(12):2398-408.	MAP3K9	NM_033141.2:c.820+4452A>G	rs17766621	CRC	Mixed population (colon cancer patients: Caucasian: 1428, Hispanic=59, Black=68, rectal cancer patients: Caucasian=625, Hispanic=61, Black=29, Asian=39)	n/a
OS only	not associated with PFS and OS.	Lee HC, Kim JG, Chae YS, Sohn SK, Kang BW, Moon JH, Jeon SW, Lee MH, Lim KH, Park JY, Choi GS, Jun SH. Prognostic impact of microRNA-related gene polymorphisms on survival of patients with colorectal cancer. J Cancer Res Clin Oncol. 2010 Jul;136(7):1073-8.	mir219-1	Leu159Pro T/C	rs213210	CRC	Asian	n/a
	in stage III patients associated with OS in the training set after correction for multiple testing by FDR and the replication set	Lin M, Gu J, Eng C, Ellis LM, Hildebrandt MA, Lin J, Huang M, Calin GA, Wang D, Dubois RN, Hawk ET, Wu X. Genetic polymorphisms in MicroRNA-related genes as predictors of clinical outcomes in colorectal adenocarcinoma patients. Clin Cancer Res. 2012 Jul 15;18(14):3982-91.	MIR219-1	NM_002931.3:c.-656A>G	rs213210	CRC patients treated with 5-FU based chemotherapy	Mixed population (training set; Caucasian=611, African-American=62, other=56; replication set; Caucasian=295, African-American=22, other=39)	n/a
no	not associated with PFS and OS.	Lee HC, Kim JG, Chae YS, Sohn SK, Kang BW, Moon JH, Jeon SW, Lee MH, Lim KH, Park JY, Choi GS, Jun SH. Prognostic impact of microRNA-related gene polymorphisms on survival of patients with colorectal cancer. J Cancer Res Clin Oncol. 2010 Jul;136(7):1073-8.	mir26a-1	C/T (NM_001008392.1:c.426+1335T>C)	rs7372209	CRC	Asian	n/a
	not associated with RFS or OS in the stage II, stage III and stage IV patients	Lin M, Gu J, Eng C, Ellis LM, Hildebrandt MA, Lin J, Huang M, Calin GA, Wang D, Dubois RN, Hawk ET, Wu X. Genetic polymorphisms in MicroRNA-related genes as predictors of clinical outcomes in colorectal adenocarcinoma patients. Clin Cancer Res. 2012 Jul 15;18(14):3982-91.	MIR26A1	NM_001008392.1:c.426+1335T>C	rs7372209	CRC patients treated with 5-FU based chemotherapy	Mixed population (training set; Caucasian=611, African-American=62, other=56; replication set; Caucasian=295, African-American=22, other=39)	n/a
	associated with TTP	Boni V, Zarate R, Villa JC, Bandrés E, Gomez MA, Maiello E, Garcia-Foncillas J, Aranda E. Role of primary miRNA polymorphic variants in metastatic colon cancer patients treated with 5-fluorouracil and irinotecan. Pharmacogenomics J. 2011 Dec;11(6):429-36.	MIR26A1	NM_005808.2:c.393+1335T>C	rs7372209	metastatic CRC patients treated with 5-FU+irinotecan	Caucasian	n/a
no	in stage II patients associated with RFS in the training set after correction for multiple testing by FDR but not in the replication set	Lin M, Gu J, Eng C, Ellis LM, Hildebrandt MA, Lin J, Huang M, Calin GA, Wang D, Dubois RN, Hawk ET, Wu X. Genetic polymorphisms in MicroRNA-related genes as predictors of clinical outcomes in colorectal adenocarcinoma patients. Clin Cancer Res. 2012 Jul 15;18(14):3982-91.	MIR373	NC_000019.9:g.54291832C>T	rs12983273	CRC patients treated with 5-FU based chemotherapy	Mixed population (training set; Caucasian=611, African-American=62, other=56; replication set; Caucasian=295, African-American=22, other=39)	n/a
OS only	associated with OS and RFS in all patients and in patients treated with chemotherapy, but not in patients not treated with chemotherapy	Xing J, Wan S, Zhou F, Qu F, Li B, Myers RE, Fu X, Palazzo JP, He X, Chen Z, Yang H. Genetic polymorphisms in pre-microRNA genes as prognostic markers of colorectal cancer. Cancer Epidemiol Biomarkers Prev. 2012 Jan;21(1):217-27.	MIR423	NR_029945.1:n.87A>C	rs6505162	CRC	Asian	n/a
	not associated with PFS and OS.	Lee HC, Kim JG, Chae YS, Sohn SK, Kang BW, Moon JH, Jeon SW, Lee MH, Lim KH, Park JY, Choi GS, Jun SH. Prognostic impact of microRNA-related gene polymorphisms on survival of patients with colorectal cancer. J Cancer Res Clin Oncol. 2010 Jul;136(7):1073-8.	mir423	C/A (NM_032141.2:c.20+302A>C)	rs6505162	CRC	Asian	n/a
	not associated with RFS or OS in the stage II, stage III and stage IV patients	Lin M, Gu J, Eng C, Ellis LM, Hildebrandt MA, Lin J, Huang M, Calin GA, Wang D, Dubois RN, Hawk ET, Wu X. Genetic polymorphisms in MicroRNA-related genes as predictors of clinical outcomes in colorectal adenocarcinoma patients. Clin Cancer Res. 2012 Jul 15;18(14):3982-91.	MIR423	NM_032141.3:c.20+302A>C	rs6505162	CRC patients treated with 5-FU based chemotherapy	Mixed population (training set; Caucasian=611, African-American=62, other=56; replication set; Caucasian=295, African-American=22, other=39)	n/a
OS only	not associated with OS or RFS	Xing J, Wan S, Zhou F, Qu F, Li B, Myers RE, Fu X, Palazzo JP, He X, Chen Z, Yang H. Genetic polymorphisms in pre-microRNA genes as prognostic markers of colorectal cancer. Cancer Epidemiol Biomarkers Prev. 2012 Jan;21(1):217-27.	MIR604	NR_030335.1:n.24C>T	rs2368392	CRC	Asian	n/a
	not associated with PFS and OS.	Lee HC, Kim JG, Chae YS, Sohn SK, Kang BW, Moon JH, Jeon SW, Lee MH, Lim KH, Park JY, Choi GS, Jun SH. Prognostic impact of microRNA-related gene polymorphisms on survival of patients with colorectal cancer. J Cancer Res Clin Oncol. 2010 Jul;136(7):1073-8.	mir604	C/T (NM_003174.3:c.827+5523C>T)	rs2368392	CRC	Asian	n/a
	in stage III patients associated with OS in the training set after correction for multiple testing by FDR, but not in the replication set	Lin M, Gu J, Eng C, Ellis LM, Hildebrandt MA, Lin J, Huang M, Calin GA, Wang D, Dubois RN, Hawk ET, Wu X. Genetic polymorphisms in MicroRNA-related genes as predictors of clinical outcomes in colorectal adenocarcinoma patients. Clin Cancer Res. 2012 Jul 15;18(14):3982-91.	MIR604	NM_003174.3:c.827+5523C>T	rs2368392	CRC patients treated with 5-FU based chemotherapy	Mixed population (training set; Caucasian=611, African-American=62, other=56; replication set; Caucasian=295, African-American=22, other=39)	n/a
OS only	associated with RFS but not with OS. associated with RFS in patients treated with chemotherapy but not in patients not treated with chemotherapy	Xing J, Wan S, Zhou F, Qu F, Li B, Myers RE, Fu X, Palazzo JP, He X, Chen Z, Yang H. Genetic polymorphisms in pre-microRNA genes as prognostic markers of colorectal cancer. Cancer Epidemiol Biomarkers Prev. 2012 Jan;21(1):217-27.	MIR608	NR_030339.1:n.37C>G	rs4919510	CRC	Asian	n/a
	not associated with PFS and OS.	Lee HC, Kim JG, Chae YS, Sohn SK, Kang BW, Moon JH, Jeon SW, Lee MH, Lim KH, Park JY, Choi GS, Jun SH. Prognostic impact of microRNA-related gene polymorphisms on survival of patients with colorectal cancer. J Cancer Res Clin Oncol. 2010 Jul;136(7):1073-8.	mir608	C/G (NM_017893.2:c.336+1412C>G)	rs4919510	CRC	Asian	n/a
	in stage III patients associated with RFS in the training set after correction for multiple testing by FDR and in the replication set; associated with OS in stage III patients in the training set after correction for multiple testing by FDR and in the replication set	Lin M, Gu J, Eng C, Ellis LM, Hildebrandt MA, Lin J, Huang M, Calin GA, Wang D, Dubois RN, Hawk ET, Wu X. Genetic polymorphisms in MicroRNA-related genes as predictors of clinical outcomes in colorectal adenocarcinoma patients. Clin Cancer Res. 2012 Jul 15;18(14):3982-91.	MIR608	NM_001203244.1:c.336+1412C>G	rs4919510	CRC patients treated with 5-FU based chemotherapy	Mixed population (training set; Caucasian=611, African-American=62, other=56; replication set; Caucasian=295, African-American=22, other=39)	n/a
	in Caucasian patients associated with DSS, but not in all patients and in African-American patients	Ryan BM, McClary AC, Valeri N, Robinson D, Paone A, Bowman ED, Robles AI, Croce C, Harris CC. rs4919510 in hsa-mir-608 is associated with outcome but not risk of colorectal cancer. PLoS One. 2012;7(5):e36306.	MIR608	NM_001203244.1:c.336+1412C>G	rs4919510	CRC	Mixed population (African-American=94, Caucasian=145)	n/a
OS and DFS	associated with DFS, OS and PFS.	Kim JG, Chae YS, Sohn SK, Moon JH, Kang BW, Park JY, Jeon SW, Lee MH, Lim KH, Choi GS, Jun SH. IVS10+12A>G polymorphism in hMSH2 gene associated with prognosis for patients with colorectal cancer. Ann Oncol. 2010 Mar;21(3):525-9.	MSH2	+63696 A/G (NM_000251.1:c.1661+12G>A)	rs3732183	CRC	Asian	n/a
no	not associated with OS. associated with DSS	Koessler et al. Common germline variation in mismatch repair genes and survival after a diagnosis of colorectal cancer.Int J Cancer. 2009 Apr 15;124(8):1887-91.	MSH3	tagSNP (NM_002439.2:c.1763+1841T>G)	rs863221	invasive CRC or anal adenocarcinoma	Caucasian	n/a
OS only	associated with OS and DSS	Koessler et al. Common germline variation in mismatch repair genes and survival after a diagnosis of colorectal cancer.Int J Cancer. 2009 Apr 15;124(8):1887-91.	MSH6	tagSNP (NM_000179.2:c.260+2214C>T)	rs3136245	invasive CRC or anal adenocarcinoma	Caucasian	n/a
OS only	associated with OS in rectal cancer patients after FDR correction	Slattery ML, Lundgreen A, Welbourn B, Corcoran C, Wolff RK. Genetic variation in selenoprotein genes, lifestyle, and risk of colon and rectal cancer. PLoS One. 2012;7(5):e37312.	MSRB1	NM_016332.2:c.205-101A>G	rs13331553	CRC	Mixed population? (USA)	n/a
OS only	associated with OS in colon and rectal cancer patients after FDR correction	Slattery ML, Lundgreen A, Welbourn B, Corcoran C, Wolff RK. Genetic variation in selenoprotein genes, lifestyle, and risk of colon and rectal cancer. PLoS One. 2012;7(5):e37312.	MSRB1	NM_016332.2:c.-137-183T>C	rs732510	CRC	Mixed population? (USA)	n/a
OS only	in stage III patients associated with TTR and OS	Dai J, Gu J, Huang M, Eng C, Kopetz ES, Ellis LM, Hawk E, Wu X. GWAS-identified colorectal cancer susceptibility loci associated with clinical outcomes. Carcinogenesis. 2012 Jul;33(7):1327-31	near BMP2	NC_000020.10:g.6388068T>C	rs355527	stage II and III CRC patients undergone surgery and treated with 5-FU-based adjuvant chemotherapy	Mixed population (African-American=22, Caucasian=240, other=23)	n/a
OS only	in stage III patients, associated with TTR and OS	Dai J, Gu J, Huang M, Eng C, Kopetz ES, Ellis LM, Hawk E, Wu X. GWAS-identified colorectal cancer susceptibility loci associated with clinical outcomes. Carcinogenesis. 2012 Jul;33(7):1327-31	near BMP2	NC_000020.10:g.6404281C>A	rs961253	stage II and III CRC patients undergone surgery and treated with 5-FU-based adjuvant chemotherapy	Mixed population (African-American=22, Caucasian=240, other=23)	n/a
OS only	in stage III patients, associated with OS	Dai J, Gu J, Huang M, Eng C, Kopetz ES, Ellis LM, Hawk E, Wu X. GWAS-identified colorectal cancer susceptibility loci associated with clinical outcomes. Carcinogenesis. 2012 Jul;33(7):1327-31	near MYC	NC_000008.10:g.128413305G>T	rs6983267	stage II and III CRC patients undergone surgery and treated with 5-FU-based adjuvant chemotherapy	Mixed population (African-American=22, Caucasian=240, other=23)	n/a
	not associated with RFS and OS	Xing J, Myers RE, He X, Qu F, Zhou F, Ma X, Hyslop T, Bao G, Wan S, Yang H, Chen Z. GWAS-identified colorectal cancer susceptibility locus associates with disease prognosis. Eur J Cancer. 2011 Jul;47(11):1699-707.	8q24	susceptibility locus identified by GWAS previously	rs6983267	CRC	Asian	susceptibility locus identified by GWAS previously
	not associated with OS	Hoskins JM, Ong PS, Keku TO, Galanko JA, Martin CF, Coleman CA, Wolfe M, Sandler RS, McLeod HL. Association of eleven common, low-penetrance colorectal cancer susceptibility genetic variants at six risk loci with clinical outcome. PLoS One. 2012;7(7):e41954	GWAS-associated susceptibility allele	NC_000008.10:g.128413305G>T	rs6983267	CRC	Mixed population (African-American=111, Caucasian=472)	GWAS-associated susceptibility allele
OS only	in stage III patients, associated with OS	Dai J, Gu J, Huang M, Eng C, Kopetz ES, Ellis LM, Hawk E, Wu X. GWAS-identified colorectal cancer susceptibility loci associated with clinical outcomes. Carcinogenesis. 2012 Jul;33(7):1327-31	near POU5F1B	NC_000008.10:g.128407443A>G	rs10505477	stage II and III CRC patients undergone surgery and treated with 5-FU-based adjuvant chemotherapy	Mixed population (African-American=22, Caucasian=240, other=23)	n/a
	not associated with OS	Hoskins JM, Ong PS, Keku TO, Galanko JA, Martin CF, Coleman CA, Wolfe M, Sandler RS, McLeod HL. Association of eleven common, low-penetrance colorectal cancer susceptibility genetic variants at six risk loci with clinical outcome. PLoS One. 2012;7(7):e41954	GWAS-associated susceptibility allele	NC_000008.10:g.128407443A>G	rs10505477	CRC	Mixed population (African-American=111, Caucasian=472)	GWAS-associated susceptibility allele
OS only	associated with OS	Gao et al. Association of NFKBIA polymorphism with colorectal cancer risk and prognosis in Swedish and Chinese populations. Scand J Gastroenterol. 2007 Mar;42(3):345-50.	NFKBIA	A/G in 3'-UTR (NM_020529.2:c.*126G>A)	rs696	CRC	Mixed population	n/a
OS only	associated with DSS and OS after FDR correction in the discovery cohort but not in the replication cohort	Passarelli MN, Phipps AI, Potter JD, Makar KW, Coghill AE, Wernli KJ, White E, Chan AT, Hutter CM, Peters U, Newcomb PA. Common single-nucleotide polymorphisms in the estrogen receptor β promoter are associated with colorectal cancer survival in postmenopausal women. Cancer Res. 2013 Jan 15;73(2):767-75.	PGR	NP_000917.3:p.Val660Leu	rs1042838	female CRC patients	Mixed population (discovery cohort=674 Caucasian+55 non-Caucasian), replication cohort=1729 Caucasian)	n/a
OS only	associated with DSS and OS after FDR correction in the discovery cohort but not in the replication cohort	Passarelli MN, Phipps AI, Potter JD, Makar KW, Coghill AE, Wernli KJ, White E, Chan AT, Hutter CM, Peters U, Newcomb PA. Common single-nucleotide polymorphisms in the estrogen receptor β promoter are associated with colorectal cancer survival in postmenopausal women. Cancer Res. 2013 Jan 15;73(2):767-75.	PGR	NM_000926.4:c.1907-3577G>A	rs11224579	female CRC patients	Mixed population (discovery cohort=674 Caucasian+55 non-Caucasian), replication cohort=1729 Caucasian)	n/a
OS only	associated with DSS and OS after FDR correction in the discovery cohort but not in the replication cohort	Passarelli MN, Phipps AI, Potter JD, Makar KW, Coghill AE, Wernli KJ, White E, Chan AT, Hutter CM, Peters U, Newcomb PA. Common single-nucleotide polymorphisms in the estrogen receptor β promoter are associated with colorectal cancer survival in postmenopausal women. Cancer Res. 2013 Jan 15;73(2):767-75.	PGR	NM_000926.4:c.1790-11426C>T	rs543215	female CRC patients	Mixed population (discovery cohort=674 Caucasian+55 non-Caucasian), replication cohort=1729 Caucasian)	n/a
OS only	associated with DSS and OS after FDR correction in the discovery cohort but not in the replication cohort	Passarelli MN, Phipps AI, Potter JD, Makar KW, Coghill AE, Wernli KJ, White E, Chan AT, Hutter CM, Peters U, Newcomb PA. Common single-nucleotide polymorphisms in the estrogen receptor β promoter are associated with colorectal cancer survival in postmenopausal women. Cancer Res. 2013 Jan 15;73(2):767-75.	PGR	NM_000926.4:c.2647-993A>G	rs563656	female CRC patients	Mixed population (discovery cohort=674 Caucasian+55 non-Caucasian), replication cohort=1729 Caucasian)	n/a
OS only	associated with OS but not DSS after FDR correction in the discovery cohort	Passarelli MN, Phipps AI, Potter JD, Makar KW, Coghill AE, Wernli KJ, White E, Chan AT, Hutter CM, Peters U, Newcomb PA. Common single-nucleotide polymorphisms in the estrogen receptor β promoter are associated with colorectal cancer survival in postmenopausal women. Cancer Res. 2013 Jan 15;73(2):767-75.	PGR	NM_000926.4:c.2213-867G>C	rs635984	female CRC patients	Mixed population (discovery cohort=674 Caucasian+55 non-Caucasian), replication cohort=1729 Caucasian)	n/a
OS only	associated with DSS and OS after correction for multiple testing by FDR	Coghill AE, Newcomb PA, Poole EM, Hutter CM, Makar KW, Duggan D, Potter JD, Ulrich CM. Genetic variation in inflammatory pathways is related to colorectal cancer survival. Clin Cancer Res. 2011 Nov 15;17(22):7139-47.	PTGS1	tagSNP NM_080591.1:c.1009+444C>T	rs10306155	invasive CRC	Mixed population (Caucasian=381, other=45)	n/a
no	associated with DSS after correction for multiple testing by FDR but not with OS	Coghill AE, Newcomb PA, Poole EM, Hutter CM, Makar KW, Duggan D, Potter JD, Ulrich CM. Genetic variation in inflammatory pathways is related to colorectal cancer survival. Clin Cancer Res. 2011 Nov 15;17(22):7139-47.	PTGS1	tagSNP NM_080591.1:c.95-3294A>G	rs1213266	invasive CRC	Mixed population (Caucasian=381, other=45)	n/a
OS only	associated with PFS and OS	Kim et al. Prostaglandin synthase 2/cyclooxygenase 2 (PTGS2/COX2) 8473T>C polymorphism associated with prognosis for patients with colorectal cancer treated with capecitabine and oxaliplatin.Cancer Chemother Pharmacol. 2009 Oct;64(5):953-6.	PTGS2	+8473 C/T (NM_000963.2:c.*427T>C)	rs5275	recurrent or metastatic CRC patients treated with cepecitabine and oxaliplatin (XELOX)	Asian	n/a
OS only	associated with OS in rectal cancer patients	Slattery ML, Lundgreen A, Wolff RK. MAP kinase genes and colon and rectal cancer. Carcinogenesis. 2012 Dec;33(12):2398-408.	RAF1	NM_002880.3:c.-26-3589G>C	rs11923427	CRC	Mixed population (colon cancer patients: Caucasian: 1428, Hispanic=59, Black=68, rectal cancer patients: Caucasian=625, Hispanic=61, Black=29, Asian=39)	n/a
OS only	associated with OS in rectal cancer patients	Slattery ML, Lundgreen A, Wolff RK. MAP kinase genes and colon and rectal cancer. Carcinogenesis. 2012 Dec;33(12):2398-408.	RAF1	NM_002880.3:c.-27+7814C>T	rs4684871	CRC	Mixed population (colon cancer patients: Caucasian: 1428, Hispanic=59, Black=68, rectal cancer patients: Caucasian=625, Hispanic=61, Black=29, Asian=39)	n/a
OS only	associated with OS in rectal cancer patients	Slattery ML, Lundgreen A, Wolff RK. MAP kinase genes and colon and rectal cancer. Carcinogenesis. 2012 Dec;33(12):2398-408.	RAF1	NM_002880.3:c.-27+418C>A	rs904453	CRC	Mixed population (colon cancer patients: Caucasian: 1428, Hispanic=59, Black=68, rectal cancer patients: Caucasian=625, Hispanic=61, Black=29, Asian=39)	n/a
OS only	associated with OS in rectal cancer patients	Slattery ML, Lundgreen A, Wolff RK. MAP kinase genes and colon and rectal cancer. Carcinogenesis. 2012 Dec;33(12):2398-408.	RAF1	NM_002880.3:c.208-2128A>C	rs9809501	CRC	Mixed population (colon cancer patients: Caucasian: 1428, Hispanic=59, Black=68, rectal cancer patients: Caucasian=625, Hispanic=61, Black=29, Asian=39)	n/a
no	in stage II patients associated with RFS in the training set after correction for multiple testing by FDR, but not in the replication set	Lin M, Gu J, Eng C, Ellis LM, Hildebrandt MA, Lin J, Huang M, Calin GA, Wang D, Dubois RN, Hawk ET, Wu X. Genetic polymorphisms in MicroRNA-related genes as predictors of clinical outcomes in colorectal adenocarcinoma patients. Clin Cancer Res. 2012 Jul 15;18(14):3982-91.	RAN	NM_006325.3:c.*770C>T	rs14035	CRC patients treated with 5-FU based chemotherapy	Mixed population (training set; Caucasian=611, African-American=62, other=56; replication set; Caucasian=295, African-American=22, other=39)	n/a
	not associated with PFS and OS.	Lee HC, Kim JG, Chae YS, Sohn SK, Kang BW, Moon JH, Jeon SW, Lee MH, Lim KH, Park JY, Choi GS, Jun SH. Prognostic impact of microRNA-related gene polymorphisms on survival of patients with colorectal cancer. J Cancer Res Clin Oncol. 2010 Jul;136(7):1073-8.	RAN	C/T (NT_009755.19:g.8780618C>T)	rs14035	CRC	Asian	n/a
no	associated with TTP	Rodriguez J, Boni V, Hernández A, Bitarte N, Zarate R, Ponz-Sarvisé M, Chopitea A, Bandres E, Garcia-Foncillas J. Association of RRM1 -37A>C polymorphism with clinical outcome in colorectal cancer patients treated with gemcitabine-based chemotherapy. Eur J Cancer. 2011 Apr;47(6):839-47.	RRM1	A-37C (NM_001033.3:c.-268C>A)	rs12806698	metastatic CRC patients pre-treated with gemcitabine-based regimens	Caucasian	CC genotype is associated with lower RRM1 expression (Rodriguez et al. Association of RRM1 -37A>C polymorphism with clinical outcome in colorectal cancer patients treated with gemcitabine-based chemotherapy. Eur J Cancer. 2011 Apr;47(6):839-47.)
no	associated with risk of recurrence and RFS in the stage II discovery cohort patients, associated with risk of recurrence in the stage II replication cohort patients	Lin M, Eng C, Hawk ET, Huang M, Lin J, Gu J, Ellis LM, Wu X. Identification of polymorphisms in ultraconserved elements associated with clinical outcomes in locally advanced colorectal adenocarcinoma. Cancer. 2012 Dec 15;118(24):6188-98.	SCD	NM_005063.4:c.*1913T>C	rs7849	stage II-III CRC patients treated with 5-fluoropyrimidine-based adjuvant chemotherapy	Mixed population	n/a
OS only	associated with EFS in all, stage II and stage III patients and OS in all, stage II and stage III patients	Hebbar et al. E-selectin gene S128R polymorphism is associated with poor prognosis in patients with stage II or III colorectal cancer.Eur J Cancer. 2009 Jul;45(10):1871-6	SELE	Ser128Arg A/C (NP_000441.2:p.Ser149Arg)	rs5361	stage II and III colorectal adenocarcinoma patients (hereditary CRC patients excluded)	Caucasian	R affects carbohydrate binding (Revelle BM, Scott D, Beck PJ. Single amino acid residues in the E- and P-selectin epidermal growth factor domains can determine carbohydrate binding specificity. J Biol Chem. 1996 Jul 5;271(27):16160-70.)
OS only	associated with OS in rectal cancer patients but not after FDR correction	Slattery ML, Lundgreen A, Welbourn B, Corcoran C, Wolff RK. Genetic variation in selenoprotein genes, lifestyle, and risk of colon and rectal cancer. PLoS One. 2012;7(5):e37312.	SEPN1	NM_020451.2:c.-55-833C>G	rs718391	CRC	Mixed population? (USA)	n/a
no	associated with risk of recurrence but not with RFS in the stage II discovery cohort patients. Not associated with risk of recurrence and RFS in the replication cohort stage II patients.	Lin M, Eng C, Hawk ET, Huang M, Lin J, Gu J, Ellis LM, Wu X. Identification of polymorphisms in ultraconserved elements associated with clinical outcomes in locally advanced colorectal adenocarcinoma. Cancer. 2012 Dec 15;118(24):6188-98.	SFXN5	NM_144579.2:c.102+2669A>T	rs2421099	stage II-III CRC patients treated with 5-fluoropyrimidine-based adjuvant chemotherapy	Mixed population	n/a
OS only	associated with PFS and OS	Budai B, Komlósi V, Adleff V, Pap É, Réti A, Nagy T, Kralovánszky J, Láng I, Hitre E. Impact of SHMT1 polymorphism on the clinical outcome of patients with metastatic colorectal cancer treated with first-line FOLFIRI+bevacizumab. Pharmacogenet Genomics. 2012 Jan;22(1):69-72.	SHMT1	C1420T (NP_004160.3:p.Leu474Phe C/T)	rs1979277	metastatic CRC patients treated with FOLFIRI+bevacizumab	Caucasian	n/a
OS only	associated with OS	Dai J, Gu J, Huang M, Eng C, Kopetz ES, Ellis LM, Hawk E, Wu X. GWAS-identified colorectal cancer susceptibility loci associated with clinical outcomes. Carcinogenesis. 2012 Jul;33(7):1327-31	SMAD7	NM_001190821.1:c.739+9819A>G	rs4464148	stage II and III CRC patients undergone surgery and treated with 5-FU-based adjuvant chemotherapy	Mixed population (African-American=22, Caucasian=240, other=23)	n/a
	not associated with OS and DSS. in patient groups regularly using NSAID two years prior to diagnosis, associated with DSS in all stage patients, patients with localized/regional disease and patients with regional disease, but not in patients with localized disease or with distant metastases. in patient groups regularly using NSAID two years prior to diagnosis, associated with DSS in all stage pat…	Passarelli MN, Coghill AE, Hutter CM, Zheng Y, Makar KW, Potter JD, Newcomb PA. Common colorectal cancer risk variants in SMAD7 are associated with survival among prediagnostic nonsteroidal anti-inflammatory drug users: a population-based study of postmenopausal women. Genes Chromosomes Cancer. 2011 Nov;50(11):875-86.	SMAD7	NM_005904.3:c.742+9819A/C/G/T	rs4464148	female invasive CRC patients	Mixed population (Caucasian=674, African-American=14, Asian/Pasific islander=22, other=17)	n/a
	not associated with OS	Hoskins JM, Ong PS, Keku TO, Galanko JA, Martin CF, Coleman CA, Wolfe M, Sandler RS, McLeod HL. Association of eleven common, low-penetrance colorectal cancer susceptibility genetic variants at six risk loci with clinical outcome. PLoS One. 2012;7(7):e41954	GWAS-associated susceptibility allele	NM_001190821.1:c.739+9819A>G	rs4464148	CRC	Mixed population (African-American=111, Caucasian=472)	GWAS-associated susceptibility allele
no	not associated with OS and DSS. in patient groups regularly using NSAID two years prior to diagnosis, associated with DSS all stage patients, patients with localized/regional disease, and patients with regional disease, but not in patients with localized disease and with distant metastases. in patient groups regularly using NSAID two years prior to diagnosis, associated with DSS in patient group …	Passarelli MN, Coghill AE, Hutter CM, Zheng Y, Makar KW, Potter JD, Newcomb PA. Common colorectal cancer risk variants in SMAD7 are associated with survival among prediagnostic nonsteroidal anti-inflammatory drug users: a population-based study of postmenopausal women. Genes Chromosomes Cancer. 2011 Nov;50(11):875-86.	SMAD7	NM_005904.3:c.743-5183A>G	rs4939827	female invasive CRC patients	Mixed population (Caucasian=674, African-American=14, Asian/Pasific islander=22, other=17)	n/a
	not associated with RFS and OS	Xing J, Myers RE, He X, Qu F, Zhou F, Ma X, Hyslop T, Bao G, Wan S, Yang H, Chen Z. GWAS-identified colorectal cancer susceptibility locus associates with disease prognosis. Eur J Cancer. 2011 Jul;47(11):1699-707.	18q21	susceptibility locus identified by GWAS previously	rs4939827	CRC	Asian	susceptibility locus identified by GWAS previously
	not associated with OS	Hoskins JM, Ong PS, Keku TO, Galanko JA, Martin CF, Coleman CA, Wolfe M, Sandler RS, McLeod HL. Association of eleven common, low-penetrance colorectal cancer susceptibility genetic variants at six risk loci with clinical outcome. PLoS One. 2012;7(7):e41954	GWAS-associated susceptibility allele	NM_001190821.1:c.740-5183A>G	rs4939827	CRC	Mixed population (African-American=111, Caucasian=472)	GWAS-associated susceptibility allele
no	associated with risk of recurrence in the stage III discovery cohort patients but not RFS; not associated with recurrence risk and RFS in the replication cohort	Lin M, Eng C, Hawk ET, Huang M, Lin J, Gu J, Ellis LM, Wu X. Identification of polymorphisms in ultraconserved elements associated with clinical outcomes in locally advanced colorectal adenocarcinoma. Cancer. 2012 Dec 15;118(24):6188-98.	TECTB	NC_000010.10:g.114078904G>A	rs11195893	stage II-III CRC patients treated with 5-fluoropyrimidine-based adjuvant chemotherapy	Mixed population	n/a
OS only	associated with 5-year OS in colon cancer but not in rectal cancer patients	Slattery ML, Herrick JS, Bondurant KL, Wolff RK. Toll-like receptor genes and their association with colon and rectal cancer development and prognosis. Int J Cancer. 2012 Jun 15;130(12):2974-80.	TLR4	NG_011475.1:g.19353T>C	rs1554973	CRC	Mixed population	n/a
no	associated with DSS in Dukes's stage C+D patients, but not in Dukes' stage A+B patients	Ungerbäck J, Belenki D, Jawad ul-Hassan A, Fredrikson M, Fransén K, Elander N, Verma D, Söderkvist P. Genetic variation and alterations of genes involved in NFκB/TNFAIP3- and NLRP3-inflammasome signaling affect susceptibility and outcome of colorectal cancer. Carcinogenesis. 2012 Nov;33(11):2126-34.	TNFAIP3	NC_000006.11:g.138006504G>A	rs6920220	sporadic CRC	Caucasian	n/a
OS only	associated with OS in rectal cancer patients but not after FDR correction	Slattery ML, Lundgreen A, Welbourn B, Corcoran C, Wolff RK. Genetic variation in selenoprotein genes, lifestyle, and risk of colon and rectal cancer. PLoS One. 2012;7(5):e37312.	TXNRD2	NM_006440.3:c.663-2832C>T	rs3788314	CRC	Mixed population? (USA)	n/a
OS only	associated with OS in colon cancer patients, but not after FDR correction	Slattery ML, Lundgreen A, Welbourn B, Corcoran C, Wolff RK. Genetic variation in selenoprotein genes, lifestyle, and risk of colon and rectal cancer. PLoS One. 2012;7(5):e37312.	TXNRD3	NM_001173513.1:c.243+672C>T	rs11718498	CRC	Mixed population? (USA)	n/a
no	in stage III patients associated with RFS in the training set after correction for multiple testing by FDR but not in the replication set	Lin M, Gu J, Eng C, Ellis LM, Hildebrandt MA, Lin J, Huang M, Calin GA, Wang D, Dubois RN, Hawk ET, Wu X. Genetic polymorphisms in MicroRNA-related genes as predictors of clinical outcomes in colorectal adenocarcinoma patients. Clin Cancer Res. 2012 Jul 15;18(14):3982-91.	XPO5	NM_020750.2:c.*659A>C	rs11077	CRC patients treated with 5-FU based chemotherapy	Mixed population (training set; Caucasian=611, African-American=62, other=56; replication set; Caucasian=295, African-American=22, other=39)	n/a

## Sheet: Additional File-4
best genetic model-final	Gene_SNP
		Kaplan-Meier
		Notes
		Output Created		12-FEB-2014 16:55:14
		Comments
		Input	Data	H:\validation study\103SNPs-codoprognostic-SPSS-Feb 12, 2014.sav
			Active Dataset	DataSet2
			Filter	<none>
			Weight	<none>
			Split File	<none>
			N of Rows in Working Data File	505
		Missing Value Handling	Definition of Missing	User-defined missing values are treated as missing.
			Cases Used	Statistics are based on all cases with valid data for all variables in the analysis.
		Syntax		KM OS_time_2010 BY SEPN1_rs718391_C_G /STATUS=OS_status_2010(1) /PRINT MEAN /PLOT SURVIVAL /TEST LOGRANK /COMPARE OVERALL POOLED.
		Resources	Processor Time	00:00:00.14
			Elapsed Time	00:00:00.14
		[DataSet2] H:\validation study\103SNPs-codoprognostic-SPSS-Feb 12, 2014.sav
		Case Processing Summary
		SEPN1_rs718391_C_G	Total N	N of Events	Censored
					N	Percent
		CC	173	54	119	0.687861
		CG	243	84	159	0.654321
		GG	88	32	56	0.636364
		Overall	504	170	334	0.662698
		Means and Medians for Survival Time
		SEPN1_rs718391_C_G	Meana				Median
			Estimate	Std. Error	95% Confidence Interval		Estimate	Std. Error	95% Confidence Interval
					Lower Bound	Upper Bound			Lower Bound	Upper Bound
		CC	8.21354	0.243505	7.73628	8.69081
		CG	7.83787	0.21585	7.4148	8.26093	9.39178	0.287403	8.82847	9.95509
		GG	8.30254	0.354543	7.60764	8.99745	10.0658	1.30846	7.50118	12.6303
		Overall	8.23213	0.163384	7.9119	8.55236	9.48493	0.26246	8.97051	9.99935
		a. Estimation is limited to the largest survival time if it is censored.
		Overall Comparisons
			Chi-Square	df	Sig.
		Log Rank (Mantel-Cox)	0.505769	2	0.776557
		Test of equality of survival distributions for the different levels of SEPN1_rs718391_C_G.
none	SEPN1_rs718391_C_G
		KM OS_time_2010 BY HS2ST1_rs9433110_G_A
		/STATUS=OS_status_2010(1)
		/PRINT MEAN
		/PLOT SURVIVAL
		/TEST LOGRANK
		/COMPARE OVERALL POOLED.
		Kaplan-Meier
		Notes
		Output Created		12-FEB-2014 16:55:23
		Comments
		Input	Data	H:\validation study\103SNPs-codoprognostic-SPSS-Feb 12, 2014.sav
			Active Dataset	DataSet2
			Filter	<none>
			Weight	<none>
			Split File	<none>
			N of Rows in Working Data File	505
		Missing Value Handling	Definition of Missing	User-defined missing values are treated as missing.
			Cases Used	Statistics are based on all cases with valid data for all variables in the analysis.
		Syntax		KM OS_time_2010 BY HS2ST1_rs9433110_G_A /STATUS=OS_status_2010(1) /PRINT MEAN /PLOT SURVIVAL /TEST LOGRANK /COMPARE OVERALL POOLED.
		Resources	Processor Time	00:00:00.14
			Elapsed Time	00:00:00.15
		[DataSet2] H:\validation study\103SNPs-codoprognostic-SPSS-Feb 12, 2014.sav
		Case Processing Summary
		HS2ST1_rs9433110_G_A	Total N	N of Events	Censored
					N	Percent
		GG	447	148	299	0.668904
		GA	56	21	35	0.625
		AA	1	1	0	0
		Overall	504	170	334	0.662698
		Means and Medians for Survival Time
		HS2ST1_rs9433110_G_A	Meana				Median
			Estimate	Std. Error	95% Confidence Interval		Estimate	Std. Error	95% Confidence Interval
					Lower Bound	Upper Bound			Lower Bound	Upper Bound
		GG	8.25999	0.17682	7.91342	8.60656	9.48493
		GA	8.04228	0.409494	7.23967	8.84488	9.33699	0.995027	7.38673	11.2872
		AA	2.30685	0	2.30685	2.30685	2.30685
		Overall	8.23213	0.163384	7.9119	8.55236	9.48493	0.26246	8.97051	9.99935
		a. Estimation is limited to the largest survival time if it is censored.
		Overall Comparisons
			Chi-Square	df	Sig.
		Log Rank (Mantel-Cox)	16.9686	2	0.000206686
		Test of equality of survival distributions for the different levels of HS2ST1_rs9433110_G_A.
none	HS2ST1_rs9433110_G_A
		KM OS_time_2010 BY DDX20_rs197412_T_C
		/STATUS=OS_status_2010(1)
		/PRINT MEAN
		/PLOT SURVIVAL
		/TEST LOGRANK
		/COMPARE OVERALL POOLED.
		Kaplan-Meier
		Notes
		Output Created		12-FEB-2014 16:55:33
		Comments
		Input	Data	H:\validation study\103SNPs-codoprognostic-SPSS-Feb 12, 2014.sav
			Active Dataset	DataSet2
			Filter	<none>
			Weight	<none>
			Split File	<none>
			N of Rows in Working Data File	505
		Missing Value Handling	Definition of Missing	User-defined missing values are treated as missing.
			Cases Used	Statistics are based on all cases with valid data for all variables in the analysis.
		Syntax		KM OS_time_2010 BY DDX20_rs197412_T_C /STATUS=OS_status_2010(1) /PRINT MEAN /PLOT SURVIVAL /TEST LOGRANK /COMPARE OVERALL POOLED.
		Resources	Processor Time	00:00:00.14
			Elapsed Time	00:00:00.14
		[DataSet2] H:\validation study\103SNPs-codoprognostic-SPSS-Feb 12, 2014.sav
		Case Processing Summary
		DDX20 _rs197412_T_C	Total N	N of Events	Censored
					N	Percent
		TT	188	71	117	0.62234
		TC	252	84	168	0.666667
		CC	64	15	49	0.765625
		Overall	504	170	334	0.662698
		Means and Medians for Survival Time
		DDX20 _rs197412_T_C	Meana				Median
			Estimate	Std. Error	95% Confidence Interval		Estimate	Std. Error	95% Confidence Interval
					Lower Bound	Upper Bound			Lower Bound	Upper Bound
		TT	7.81946	0.273724	7.28296	8.35596	9.03288	0.293191	8.45822	9.60753
		TC	8.10989	0.197148	7.72348	8.4963	9.48493	0.277792	8.94046	10.0294
		CC	8.97811	0.383555	8.22634	9.72988
		Overall	8.23213	0.163384	7.9119	8.55236	9.48493	0.26246	8.97051	9.99935
		a. Estimation is limited to the largest survival time if it is censored.
		Overall Comparisons
			Chi-Square	df	Sig.
		Log Rank (Mantel-Cox)	4.2904	2	0.117044
		Test of equality of survival distributions for the different levels of DDX20 _rs197412_T_C.
recessive	DDX20 _rs197412_T_C
		KM OS_time_2010 BY CRP_rs1205_C_T
		/STATUS=OS_status_2010(1)
		/PRINT MEAN
		/PLOT SURVIVAL
		/TEST LOGRANK
		/COMPARE OVERALL POOLED.
		Kaplan-Meier
		Notes
		Output Created		12-FEB-2014 16:55:42
		Comments
		Input	Data	H:\validation study\103SNPs-codoprognostic-SPSS-Feb 12, 2014.sav
			Active Dataset	DataSet2
			Filter	<none>
			Weight	<none>
			Split File	<none>
			N of Rows in Working Data File	505
		Missing Value Handling	Definition of Missing	User-defined missing values are treated as missing.
			Cases Used	Statistics are based on all cases with valid data for all variables in the analysis.
		Syntax		KM OS_time_2010 BY CRP_rs1205_C_T /STATUS=OS_status_2010(1) /PRINT MEAN /PLOT SURVIVAL /TEST LOGRANK /COMPARE OVERALL POOLED.
		Resources	Processor Time	00:00:00.12
			Elapsed Time	00:00:00.13
		[DataSet2] H:\validation study\103SNPs-codoprognostic-SPSS-Feb 12, 2014.sav
		Case Processing Summary
		CRP_rs1205_C_T	Total N	N of Events	Censored
					N	Percent
		CC	202	74	128	0.633663
		CT	237	74	163	0.687764
		TT	65	22	43	0.661538
		Overall	504	170	334	0.662698
		Means and Medians for Survival Time
		CRP_rs1205_C_T	Meana				Median
			Estimate	Std. Error	95% Confidence Interval		Estimate	Std. Error	95% Confidence Interval
					Lower Bound	Upper Bound			Lower Bound	Upper Bound
		CC	7.82752	0.253244	7.33116	8.32388	9.38082	0.632454	8.14121	10.6204
		CT	8.18028	0.208126	7.77235	8.58821	9.39178	0.553726	8.30648	10.4771
		TT	8.48729	0.423045	7.65812	9.31646
		Overall	8.23213	0.163384	7.9119	8.55236	9.48493	0.26246	8.97051	9.99935
		a. Estimation is limited to the largest survival time if it is censored.
		Overall Comparisons
			Chi-Square	df	Sig.
		Log Rank (Mantel-Cox)	1.83802	2	0.398914
		Test of equality of survival distributions for the different levels of CRP_rs1205_C_T.
codominant	CRP_rs1205_C_T
		KM OS_time_2010 BY SELE_rs5361_A_C
		/STATUS=OS_status_2010(1)
		/PRINT MEAN
		/PLOT SURVIVAL
		/TEST LOGRANK
		/COMPARE OVERALL POOLED.
		Kaplan-Meier
		Notes
		Output Created		12-FEB-2014 16:56:00
		Comments
		Input	Data	H:\validation study\103SNPs-codoprognostic-SPSS-Feb 12, 2014.sav
			Active Dataset	DataSet2
			Filter	<none>
			Weight	<none>
			Split File	<none>
			N of Rows in Working Data File	505
		Missing Value Handling	Definition of Missing	User-defined missing values are treated as missing.
			Cases Used	Statistics are based on all cases with valid data for all variables in the analysis.
		Syntax		KM OS_time_2010 BY SELE_rs5361_A_C /STATUS=OS_status_2010(1) /PRINT MEAN /PLOT SURVIVAL /TEST LOGRANK /COMPARE OVERALL POOLED.
		Resources	Processor Time	00:00:00.14
			Elapsed Time	00:00:00.14
		[DataSet2] H:\validation study\103SNPs-codoprognostic-SPSS-Feb 12, 2014.sav
		Case Processing Summary
		SELE _rs5361_A_C	Total N	N of Events	Censored
					N	Percent
		AA	428	142	286	0.668224
		AC	70	26	44	0.628571
		CC	6	2	4	0.666667
		Overall	504	170	334	0.662698
		Means and Medians for Survival Time
		SELE _rs5361_A_C	Meana				Median
			Estimate	Std. Error	95% Confidence Interval		Estimate	Std. Error	95% Confidence Interval
					Lower Bound	Upper Bound			Lower Bound	Upper Bound
		AA	8.25368	0.177068	7.90663	8.60073	9.48493	0.29348	8.90971	10.0602
		AC	8.02623	0.366986	7.30694	8.74552
		CC	8.11963	0.700202	6.74724	9.49203	8.72603	0
		Overall	8.23213	0.163384	7.9119	8.55236	9.48493	0.26246	8.97051	9.99935
		a. Estimation is limited to the largest survival time if it is censored.
		Overall Comparisons
			Chi-Square	df	Sig.
		Log Rank (Mantel-Cox)	0.380851	2	0.826607
		Test of equality of survival distributions for the different levels of SELE _rs5361_A_C.
dominant	SELE _rs5361_A_C
		KM OS_time_2010 BY PTGS2_rs5275_T_C
		/STATUS=OS_status_2010(1)
		/PRINT MEAN
		/PLOT SURVIVAL
		/TEST LOGRANK
		/COMPARE OVERALL POOLED.
		Kaplan-Meier
		Notes
		Output Created		12-FEB-2014 16:56:13
		Comments
		Input	Data	H:\validation study\103SNPs-codoprognostic-SPSS-Feb 12, 2014.sav
			Active Dataset	DataSet2
			Filter	<none>
			Weight	<none>
			Split File	<none>
			N of Rows in Working Data File	505
		Missing Value Handling	Definition of Missing	User-defined missing values are treated as missing.
			Cases Used	Statistics are based on all cases with valid data for all variables in the analysis.
		Syntax		KM OS_time_2010 BY PTGS2_rs5275_T_C /STATUS=OS_status_2010(1) /PRINT MEAN /PLOT SURVIVAL /TEST LOGRANK /COMPARE OVERALL POOLED.
		Resources	Processor Time	00:00:00.17
			Elapsed Time	00:00:00.15
		[DataSet2] H:\validation study\103SNPs-codoprognostic-SPSS-Feb 12, 2014.sav
		Case Processing Summary
		PTGS2_rs5275_T_C	Total N	N of Events	Censored
					N	Percent
		TT	230	72	158	0.686957
		TC	215	78	137	0.637209
		CC	59	20	39	0.661017
		Overall	504	170	334	0.662698
		Means and Medians for Survival Time
		PTGS2_rs5275_T_C	Meana				Median
			Estimate	Std. Error	95% Confidence Interval		Estimate	Std. Error	95% Confidence Interval
					Lower Bound	Upper Bound			Lower Bound	Upper Bound
		TT	8.48062	0.231895	8.02611	8.93513	9.66027
		TC	7.87024	0.2279	7.42356	8.31693
		CC	7.63072	0.403625	6.83961	8.42182	8.86849	0.159849	8.55519	9.1818
		Overall	8.23213	0.163384	7.9119	8.55236	9.48493	0.26246	8.97051	9.99935
		a. Estimation is limited to the largest survival time if it is censored.
		Overall Comparisons
			Chi-Square	df	Sig.
		Log Rank (Mantel-Cox)	1.61335	2	0.44634
		Test of equality of survival distributions for the different levels of PTGS2_rs5275_T_C.
recessive, codominant, dominant	PTGS2_rs5275_T_C
		KM OS_time_2010 BY MSH2_rs7607076_A_G
		/STATUS=OS_status_2010(1)
		/PRINT MEAN
		/PLOT SURVIVAL
		/TEST LOGRANK
		/COMPARE OVERALL POOLED.
		Kaplan-Meier
		Notes
		Output Created		12-FEB-2014 16:56:21
		Comments
		Input	Data	H:\validation study\103SNPs-codoprognostic-SPSS-Feb 12, 2014.sav
			Active Dataset	DataSet2
			Filter	<none>
			Weight	<none>
			Split File	<none>
			N of Rows in Working Data File	505
		Missing Value Handling	Definition of Missing	User-defined missing values are treated as missing.
			Cases Used	Statistics are based on all cases with valid data for all variables in the analysis.
		Syntax		KM OS_time_2010 BY MSH2_rs7607076_A_G /STATUS=OS_status_2010(1) /PRINT MEAN /PLOT SURVIVAL /TEST LOGRANK /COMPARE OVERALL POOLED.
		Resources	Processor Time	00:00:00.14
			Elapsed Time	00:00:00.14
		[DataSet2] H:\validation study\103SNPs-codoprognostic-SPSS-Feb 12, 2014.sav
		Case Processing Summary
		MSH2_rs7607076_A_G	Total N	N of Events	Censored
					N	Percent
		AA	249	86	163	0.654618
		AG	205	69	136	0.663415
		GG	50	15	35	0.7
		Overall	504	170	334	0.662698
		Means and Medians for Survival Time
		MSH2_rs7607076_A_G	Meana				Median
			Estimate	Std. Error	95% Confidence Interval		Estimate	Std. Error	95% Confidence Interval
					Lower Bound	Upper Bound			Lower Bound	Upper Bound
		AA	8.07745	0.223728	7.63895	8.51596	9.66027
		AG	7.91687	0.225744	7.47441	8.35933	9.33699	0.330201	8.68979	9.98418
		GG	8.6619	0.469213	7.74224	9.58155	10.0658	1.04113	8.02513	12.1064
		Overall	8.23213	0.163384	7.9119	8.55236	9.48493	0.26246	8.97051	9.99935
		a. Estimation is limited to the largest survival time if it is censored.
		Overall Comparisons
			Chi-Square	df	Sig.
		Log Rank (Mantel-Cox)	1.03195	2	0.596917
		Test of equality of survival distributions for the different levels of MSH2_rs7607076_A_G.
recessive	MSH2_rs7607076_A_G
		KM OS_time_2010 BY MSH6_rs3136245_C_T
		/STATUS=OS_status_2010(1)
		/PRINT MEAN
		/PLOT SURVIVAL
		/TEST LOGRANK
		/COMPARE OVERALL POOLED.
		Kaplan-Meier
		Notes
		Output Created		12-FEB-2014 16:56:30
		Comments
		Input	Data	H:\validation study\103SNPs-codoprognostic-SPSS-Feb 12, 2014.sav
			Active Dataset	DataSet2
			Filter	<none>
			Weight	<none>
			Split File	<none>
			N of Rows in Working Data File	505
		Missing Value Handling	Definition of Missing	User-defined missing values are treated as missing.
			Cases Used	Statistics are based on all cases with valid data for all variables in the analysis.
		Syntax		KM OS_time_2010 BY MSH6_rs3136245_C_T /STATUS=OS_status_2010(1) /PRINT MEAN /PLOT SURVIVAL /TEST LOGRANK /COMPARE OVERALL POOLED.
		Resources	Processor Time	00:00:00.16
			Elapsed Time	00:00:00.13
		[DataSet2] H:\validation study\103SNPs-codoprognostic-SPSS-Feb 12, 2014.sav
		Case Processing Summary
		MSH6_rs3136245_C_T	Total N	N of Events	Censored
					N	Percent
		CC	338	117	221	0.653846
		CT	148	49	99	0.668919
		TT	17	4	13	0.764706
		Overall	503	170	333	0.662028
		Means and Medians for Survival Time
		MSH6_rs3136245_C_T	Meana				Median
			Estimate	Std. Error	95% Confidence Interval		Estimate	Std. Error	95% Confidence Interval
					Lower Bound	Upper Bound			Lower Bound	Upper Bound
		CC	8.16778	0.198015	7.77967	8.55589	9.48493	0.323237	8.85139	10.1185
		CT	7.92063	0.261499	7.40809	8.43317	9.39178
		TT	8.65875	0.741586	7.20524	10.1123
		Overall	8.22735	0.163546	7.9068	8.5479	9.48493	0.262601	8.97023	9.99963
		a. Estimation is limited to the largest survival time if it is censored.
		Overall Comparisons
			Chi-Square	df	Sig.
		Log Rank (Mantel-Cox)	0.812101	2	0.666277
		Test of equality of survival distributions for the different levels of MSH6_rs3136245_C_T.
recessive	MSH6_rs3136245_C_T
		KM OS_time_2010 BY SFXN5_rs17008608_A_G
		/STATUS=OS_status_2010(1)
		/PRINT MEAN
		/PLOT SURVIVAL
		/TEST LOGRANK
		/COMPARE OVERALL POOLED.
		Kaplan-Meier
		Notes
		Output Created		12-FEB-2014 16:56:38
		Comments
		Input	Data	H:\validation study\103SNPs-codoprognostic-SPSS-Feb 12, 2014.sav
			Active Dataset	DataSet2
			Filter	<none>
			Weight	<none>
			Split File	<none>
			N of Rows in Working Data File	505
		Missing Value Handling	Definition of Missing	User-defined missing values are treated as missing.
			Cases Used	Statistics are based on all cases with valid data for all variables in the analysis.
		Syntax		KM OS_time_2010 BY SFXN5_rs17008608_A_G /STATUS=OS_status_2010(1) /PRINT MEAN /PLOT SURVIVAL /TEST LOGRANK /COMPARE OVERALL POOLED.
		Resources	Processor Time	00:00:00.14
			Elapsed Time	00:00:00.14
		[DataSet2] H:\validation study\103SNPs-codoprognostic-SPSS-Feb 12, 2014.sav
		Case Processing Summary
		SFXN5_rs17008608_A_G	Total N	N of Events	Censored
					N	Percent
		AA	360	121	239	0.663889
		AG	136	45	91	0.669118
		GG	8	4	4	0.5
		Overall	504	170	334	0.662698
		Means and Medians for Survival Time
		SFXN5_rs17008608_A_G	Meana				Median
			Estimate	Std. Error	95% Confidence Interval		Estimate	Std. Error	95% Confidence Interval
					Lower Bound	Upper Bound			Lower Bound	Upper Bound
		AA	8.24958	0.192616	7.87205	8.62711	9.39178
		AG	8.16031	0.290814	7.59031	8.73031	10.0658	0.401568	9.27868	10.8528
		GG	5.53151	0.971705	3.62696	7.43605	5.23562
		Overall	8.23213	0.163384	7.9119	8.55236	9.48493	0.26246	8.97051	9.99935
		a. Estimation is limited to the largest survival time if it is censored.
		Overall Comparisons
			Chi-Square	df	Sig.
		Log Rank (Mantel-Cox)	1.91061	2	0.384694
		Test of equality of survival distributions for the different levels of SFXN5_rs17008608_A_G.
none	SFXN5_rs17008608_A_G
		KM OS_time_2010 BY DUSP2_rs1724120_G_A
		/STATUS=OS_status_2010(1)
		/PRINT MEAN
		/PLOT SURVIVAL
		/TEST LOGRANK
		/COMPARE OVERALL POOLED.
		Kaplan-Meier
		Notes
		Output Created		12-FEB-2014 16:56:45
		Comments
		Input	Data	H:\validation study\103SNPs-codoprognostic-SPSS-Feb 12, 2014.sav
			Active Dataset	DataSet2
			Filter	<none>
			Weight	<none>
			Split File	<none>
			N of Rows in Working Data File	505
		Missing Value Handling	Definition of Missing	User-defined missing values are treated as missing.
			Cases Used	Statistics are based on all cases with valid data for all variables in the analysis.
		Syntax		KM OS_time_2010 BY DUSP2_rs1724120_G_A /STATUS=OS_status_2010(1) /PRINT MEAN /PLOT SURVIVAL /TEST LOGRANK /COMPARE OVERALL POOLED.
		Resources	Processor Time	00:00:00.14
			Elapsed Time	00:00:00.14
		[DataSet2] H:\validation study\103SNPs-codoprognostic-SPSS-Feb 12, 2014.sav
		Case Processing Summary
		DUSP2 _rs1724120_G_A	Total N	N of Events	Censored
					N	Percent
		GG	171	53	118	0.690058
		GA	249	84	165	0.662651
		AA	84	33	51	0.607143
		Overall	504	170	334	0.662698
		Means and Medians for Survival Time
		DUSP2 _rs1724120_G_A	Meana				Median
			Estimate	Std. Error	95% Confidence Interval		Estimate	Std. Error	95% Confidence Interval
					Lower Bound	Upper Bound			Lower Bound	Upper Bound
		GG	8.21845	0.242138	7.74386	8.69304	9.48493
		GA	8.126	0.223396	7.68814	8.56385	9.66027
		AA	7.79373	0.382145	7.04473	8.54274	8.86849	0.877718	7.14817	10.5888
		Overall	8.23213	0.163384	7.9119	8.55236	9.48493	0.26246	8.97051	9.99935
		a. Estimation is limited to the largest survival time if it is censored.
		Overall Comparisons
			Chi-Square	df	Sig.
		Log Rank (Mantel-Cox)	1.29954	2	0.522165
		Test of equality of survival distributions for the different levels of DUSP2 _rs1724120_G_A.
dominant	DUSP2 _rs1724120_G_A
		KM OS_time_2010 BY IL1A_rs10496444_T_C
		/STATUS=OS_status_2010(1)
		/PRINT MEAN
		/PLOT SURVIVAL
		/TEST LOGRANK
		/COMPARE OVERALL POOLED.
		Kaplan-Meier
		Notes
		Output Created		12-FEB-2014 16:56:54
		Comments
		Input	Data	H:\validation study\103SNPs-codoprognostic-SPSS-Feb 12, 2014.sav
			Active Dataset	DataSet2
			Filter	<none>
			Weight	<none>
			Split File	<none>
			N of Rows in Working Data File	505
		Missing Value Handling	Definition of Missing	User-defined missing values are treated as missing.
			Cases Used	Statistics are based on all cases with valid data for all variables in the analysis.
		Syntax		KM OS_time_2010 BY IL1A_rs10496444_T_C /STATUS=OS_status_2010(1) /PRINT MEAN /PLOT SURVIVAL /TEST LOGRANK /COMPARE OVERALL POOLED.
		Resources	Processor Time	00:00:00.14
			Elapsed Time	00:00:00.13
		[DataSet2] H:\validation study\103SNPs-codoprognostic-SPSS-Feb 12, 2014.sav
		Case Processing Summary
		IL1A_rs10496444_T_C	Total N	N of Events	Censored
					N	Percent
		TT	237	81	156	0.658228
		TC	205	64	141	0.687805
		CC	62	25	37	0.596774
		Overall	504	170	334	0.662698
		Means and Medians for Survival Time
		IL1A_rs10496444_T_C	Meana				Median
			Estimate	Std. Error	95% Confidence Interval		Estimate	Std. Error	95% Confidence Interval
					Lower Bound	Upper Bound			Lower Bound	Upper Bound
		TT	8.23659	0.216872	7.81152	8.66166	10.0658
		TC	8.27131	0.260659	7.76042	8.78221	9.39178	0.237443	8.92639	9.85717
		CC	7.23232	0.445149	6.35983	8.10481	8.72603	1.60598	5.57831	11.8737
		Overall	8.23213	0.163384	7.9119	8.55236	9.48493	0.26246	8.97051	9.99935
		a. Estimation is limited to the largest survival time if it is censored.
		Overall Comparisons
			Chi-Square	df	Sig.
		Log Rank (Mantel-Cox)	3.03343	2	0.219431
		Test of equality of survival distributions for the different levels of IL1A_rs10496444_T_C.
recessive	IL1A_rs10496444_T_C
		KM OS_time_2010 BY IL1B_rs1143627_T_C
		/STATUS=OS_status_2010(1)
		/PRINT MEAN
		/PLOT SURVIVAL
		/TEST LOGRANK
		/COMPARE OVERALL POOLED.
		Kaplan-Meier
		Notes
		Output Created		12-FEB-2014 16:57:03
		Comments
		Input	Data	H:\validation study\103SNPs-codoprognostic-SPSS-Feb 12, 2014.sav
			Active Dataset	DataSet2
			Filter	<none>
			Weight	<none>
			Split File	<none>
			N of Rows in Working Data File	505
		Missing Value Handling	Definition of Missing	User-defined missing values are treated as missing.
			Cases Used	Statistics are based on all cases with valid data for all variables in the analysis.
		Syntax		KM OS_time_2010 BY IL1B_rs1143627_T_C /STATUS=OS_status_2010(1) /PRINT MEAN /PLOT SURVIVAL /TEST LOGRANK /COMPARE OVERALL POOLED.
		Resources	Processor Time	00:00:00.16
			Elapsed Time	00:00:00.14
		[DataSet2] H:\validation study\103SNPs-codoprognostic-SPSS-Feb 12, 2014.sav
		Case Processing Summary
		IL1B_rs1143627_T_C	Total N	N of Events	Censored
					N	Percent
		TT	227	75	152	0.669604
		TC	207	75	132	0.637681
		CC	70	20	50	0.714286
		Overall	504	170	334	0.662698
		Means and Medians for Survival Time
		IL1B_rs1143627_T_C	Meana				Median
			Estimate	Std. Error	95% Confidence Interval		Estimate	Std. Error	95% Confidence Interval
					Lower Bound	Upper Bound			Lower Bound	Upper Bound
		TT	8.37639	0.233753	7.91823	8.83454	10.0658
		TC	7.72668	0.231956	7.27205	8.18132	9.38082	0.269884	8.85185	9.90979
		CC	8.20945	0.368382	7.48742	8.93148
		Overall	8.23213	0.163384	7.9119	8.55236	9.48493	0.26246	8.97051	9.99935
		a. Estimation is limited to the largest survival time if it is censored.
		Overall Comparisons
			Chi-Square	df	Sig.
		Log Rank (Mantel-Cox)	1.5848	2	0.452756
		Test of equality of survival distributions for the different levels of IL1B_rs1143627_T_C.
codominant	IL1B_rs1143627_T_C
		KM OS_time_2010 BY CXCR2_rs7426289_C_T
		/STATUS=OS_status_2010(1)
		/PRINT MEAN
		/PLOT SURVIVAL
		/TEST LOGRANK
		/COMPARE OVERALL POOLED.
		Kaplan-Meier
		Notes
		Output Created		12-FEB-2014 16:57:12
		Comments
		Input	Data	H:\validation study\103SNPs-codoprognostic-SPSS-Feb 12, 2014.sav
			Active Dataset	DataSet2
			Filter	<none>
			Weight	<none>
			Split File	<none>
			N of Rows in Working Data File	505
		Missing Value Handling	Definition of Missing	User-defined missing values are treated as missing.
			Cases Used	Statistics are based on all cases with valid data for all variables in the analysis.
		Syntax		KM OS_time_2010 BY CXCR2_rs7426289_C_T /STATUS=OS_status_2010(1) /PRINT MEAN /PLOT SURVIVAL /TEST LOGRANK /COMPARE OVERALL POOLED.
		Resources	Processor Time	00:00:00.14
			Elapsed Time	00:00:00.14
		[DataSet2] H:\validation study\103SNPs-codoprognostic-SPSS-Feb 12, 2014.sav
		Case Processing Summary
		CXCR2_rs7426289_C_T	Total N	N of Events	Censored
					N	Percent
		CC	135	44	91	0.674074
		CT	237	89	148	0.624473
		TT	132	37	95	0.719697
		Overall	504	170	334	0.662698
		Means and Medians for Survival Time
		CXCR2_rs7426289_C_T	Meana				Median
			Estimate	Std. Error	95% Confidence Interval		Estimate	Std. Error	95% Confidence Interval
					Lower Bound	Upper Bound			Lower Bound	Upper Bound
		CC	8.25593	0.285176	7.69699	8.81488	9.34247	0.30335	8.7479	9.93703
		CT	7.94966	0.247314	7.46492	8.43439	9.66027	0.892448	7.91108	11.4095
		TT	8.42353	0.266976	7.90026	8.9468	10.0658	0.67417	8.74438	11.3871
		Overall	8.23213	0.163384	7.9119	8.55236	9.48493	0.26246	8.97051	9.99935
		a. Estimation is limited to the largest survival time if it is censored.
		Overall Comparisons
			Chi-Square	df	Sig.
		Log Rank (Mantel-Cox)	4.33733	2	0.11433
		Test of equality of survival distributions for the different levels of CXCR2_rs7426289_C_T.
codominant	CXCR2_rs7426289_C_T
		KM OS_time_2010 BY RAF1_rs9809501_T_G
		/STATUS=OS_status_2010(1)
		/PRINT MEAN
		/PLOT SURVIVAL
		/TEST LOGRANK
		/COMPARE OVERALL POOLED.
		Kaplan-Meier
		Notes
		Output Created		12-FEB-2014 16:57:21
		Comments
		Input	Data	H:\validation study\103SNPs-codoprognostic-SPSS-Feb 12, 2014.sav
			Active Dataset	DataSet2
			Filter	<none>
			Weight	<none>
			Split File	<none>
			N of Rows in Working Data File	505
		Missing Value Handling	Definition of Missing	User-defined missing values are treated as missing.
			Cases Used	Statistics are based on all cases with valid data for all variables in the analysis.
		Syntax		KM OS_time_2010 BY RAF1_rs9809501_T_G /STATUS=OS_status_2010(1) /PRINT MEAN /PLOT SURVIVAL /TEST LOGRANK /COMPARE OVERALL POOLED.
		Resources	Processor Time	00:00:00.14
			Elapsed Time	00:00:00.14
		[DataSet2] H:\validation study\103SNPs-codoprognostic-SPSS-Feb 12, 2014.sav
		Case Processing Summary
		RAF1 _rs9809501_T_G	Total N	N of Events	Censored
					N	Percent
		TT	406	130	276	0.679803
		TG	93	38	55	0.591398
		GG	5	2	3	0.6
		Overall	504	170	334	0.662698
		Means and Medians for Survival Time
		RAF1 _rs9809501_T_G	Meana				Median
			Estimate	Std. Error	95% Confidence Interval		Estimate	Std. Error	95% Confidence Interval
					Lower Bound	Upper Bound			Lower Bound	Upper Bound
		TT	8.05403	0.164923	7.73078	8.37728	9.48493	0.283296	8.92967	10.0402
		TG	7.99551	0.360159	7.2896	8.70142	9.38082
		GG	8.68	0.718275	7.27218	10.0878	9.33699	2.85473	3.74172	14.9323
		Overall	8.23213	0.163384	7.9119	8.55236	9.48493	0.26246	8.97051	9.99935
		a. Estimation is limited to the largest survival time if it is censored.
		Overall Comparisons
			Chi-Square	df	Sig.
		Log Rank (Mantel-Cox)	0.915224	2	0.632793
		Test of equality of survival distributions for the different levels of RAF1 _rs9809501_T_G.
dominant	RAF1 _rs9809501_T_G
		KM OS_time_2010 BY RAF1_rs7643321_A_G
		/STATUS=OS_status_2010(1)
		/PRINT MEAN
		/PLOT SURVIVAL
		/TEST LOGRANK
		/COMPARE OVERALL POOLED.
		Kaplan-Meier
		Notes
		Output Created		12-FEB-2014 16:57:29
		Comments
		Input	Data	H:\validation study\103SNPs-codoprognostic-SPSS-Feb 12, 2014.sav
			Active Dataset	DataSet2
			Filter	<none>
			Weight	<none>
			Split File	<none>
			N of Rows in Working Data File	505
		Missing Value Handling	Definition of Missing	User-defined missing values are treated as missing.
			Cases Used	Statistics are based on all cases with valid data for all variables in the analysis.
		Syntax		KM OS_time_2010 BY RAF1_rs7643321_A_G /STATUS=OS_status_2010(1) /PRINT MEAN /PLOT SURVIVAL /TEST LOGRANK /COMPARE OVERALL POOLED.
		Resources	Processor Time	00:00:00.13
			Elapsed Time	00:00:00.14
		[DataSet2] H:\validation study\103SNPs-codoprognostic-SPSS-Feb 12, 2014.sav
		Case Processing Summary
		RAF1 _rs7643321_A_G	Total N	N of Events	Censored
					N	Percent
		AA	349	112	237	0.679083
		AG	143	55	88	0.615385
		GG	12	3	9	0.75
		Overall	504	170	334	0.662698
		Means and Medians for Survival Time
		RAF1 _rs7643321_A_G	Meana				Median
			Estimate	Std. Error	95% Confidence Interval		Estimate	Std. Error	95% Confidence Interval
					Lower Bound	Upper Bound			Lower Bound	Upper Bound
		AA	8.00518	0.18273	7.64703	8.36333	9.48493	0.513632	8.47821	10.4917
		AG	8.15792	0.284665	7.59998	8.71587	9.39178	0.405082	8.59782	10.1857
		GG	8.8204	0.518249	7.80463	9.83616
		Overall	8.23213	0.163384	7.9119	8.55236	9.48493	0.26246	8.97051	9.99935
		a. Estimation is limited to the largest survival time if it is censored.
		Overall Comparisons
			Chi-Square	df	Sig.
		Log Rank (Mantel-Cox)	1.21251	2	0.54539
		Test of equality of survival distributions for the different levels of RAF1 _rs7643321_A_G.
recessive	RAF1 _rs7643321_A_G
		KM OS_time_2010 BY RAF1_rs4684871_A_G
		/STATUS=OS_status_2010(1)
		/PRINT MEAN
		/PLOT SURVIVAL
		/TEST LOGRANK
		/COMPARE OVERALL POOLED.
		Kaplan-Meier
		Notes
		Output Created		12-FEB-2014 16:57:41
		Comments
		Input	Data	H:\validation study\103SNPs-codoprognostic-SPSS-Feb 12, 2014.sav
			Active Dataset	DataSet2
			Filter	<none>
			Weight	<none>
			Split File	<none>
			N of Rows in Working Data File	505
		Missing Value Handling	Definition of Missing	User-defined missing values are treated as missing.
			Cases Used	Statistics are based on all cases with valid data for all variables in the analysis.
		Syntax		KM OS_time_2010 BY RAF1_rs4684871_A_G /STATUS=OS_status_2010(1) /PRINT MEAN /PLOT SURVIVAL /TEST LOGRANK /COMPARE OVERALL POOLED.
		Resources	Processor Time	00:00:00.13
			Elapsed Time	00:00:00.13
		[DataSet2] H:\validation study\103SNPs-codoprognostic-SPSS-Feb 12, 2014.sav
		Case Processing Summary
		RAF1 _rs4684871_A_G	Total N	N of Events	Censored
					N	Percent
		AA	163	56	107	0.656442
		AG	247	80	167	0.676113
		GG	91	32	59	0.648352
		Overall	501	168	333	0.664671
		Means and Medians for Survival Time
		RAF1 _rs4684871_A_G	Meana				Median
			Estimate	Std. Error	95% Confidence Interval		Estimate	Std. Error	95% Confidence Interval
					Lower Bound	Upper Bound			Lower Bound	Upper Bound
		AA	7.92233	0.262532	7.40777	8.4369	9.48493	0.624419	8.26107	10.7088
		AG	8.30819	0.237605	7.84249	8.7739	9.66027	0.596779	8.49059	10.83
		GG	8.14227	0.358108	7.44038	8.84416	9.39178
		Overall	8.25071	0.163432	7.93039	8.57104	9.48493	0.262392	8.97064	9.99922
		a. Estimation is limited to the largest survival time if it is censored.
		Overall Comparisons
			Chi-Square	df	Sig.
		Log Rank (Mantel-Cox)	0.172577	2	0.91733
		Test of equality of survival distributions for the different levels of RAF1 _rs4684871_A_G.
none	RAF1 _rs4684871_A_G
		KM OS_time_2010 BY RAF1_rs6795441_A_G
		/STATUS=OS_status_2010(1)
		/PRINT MEAN
		/PLOT SURVIVAL
		/TEST LOGRANK
		/COMPARE OVERALL POOLED.
		Kaplan-Meier
		Notes
		Output Created		12-FEB-2014 16:57:49
		Comments
		Input	Data	H:\validation study\103SNPs-codoprognostic-SPSS-Feb 12, 2014.sav
			Active Dataset	DataSet2
			Filter	<none>
			Weight	<none>
			Split File	<none>
			N of Rows in Working Data File	505
		Missing Value Handling	Definition of Missing	User-defined missing values are treated as missing.
			Cases Used	Statistics are based on all cases with valid data for all variables in the analysis.
		Syntax		KM OS_time_2010 BY RAF1_rs6795441_A_G /STATUS=OS_status_2010(1) /PRINT MEAN /PLOT SURVIVAL /TEST LOGRANK /COMPARE OVERALL POOLED.
		Resources	Processor Time	00:00:00.14
			Elapsed Time	00:00:00.14
		[DataSet2] H:\validation study\103SNPs-codoprognostic-SPSS-Feb 12, 2014.sav
		Case Processing Summary
		RAF1 _rs6795441_A_G	Total N	N of Events	Censored
					N	Percent
		AA	159	54	105	0.660377
		AG	241	79	162	0.672199
		GG	101	36	65	0.643564
		Overall	501	169	332	0.662675
		Means and Medians for Survival Time
		RAF1 _rs6795441_A_G	Meana				Median
			Estimate	Std. Error	95% Confidence Interval		Estimate	Std. Error	95% Confidence Interval
					Lower Bound	Upper Bound			Lower Bound	Upper Bound
		AA	8.20791	0.267844	7.68293	8.73288	9.39178
		AG	8.20289	0.244765	7.72315	8.68263	9.48493	0.349672	8.79957	10.1703
		GG	7.83439	0.344364	7.15944	8.50934	9.03288	1.06503	6.94542	11.1203
		Overall	8.21245	0.165068	7.88892	8.53599	9.39178	0.236407	8.92842	9.85514
		a. Estimation is limited to the largest survival time if it is censored.
		Overall Comparisons
			Chi-Square	df	Sig.
		Log Rank (Mantel-Cox)	0.236629	2	0.888417
		Test of equality of survival distributions for the different levels of RAF1 _rs6795441_A_G.
none	RAF1 _rs6795441_A_G
		KM OS_time_2010 BY mir26a1_rs7372209_C_T
		/STATUS=OS_status_2010(1)
		/PRINT MEAN
		/PLOT SURVIVAL
		/TEST LOGRANK
		/COMPARE OVERALL POOLED.
		Kaplan-Meier
		Notes
		Output Created		12-FEB-2014 16:57:56
		Comments
		Input	Data	H:\validation study\103SNPs-codoprognostic-SPSS-Feb 12, 2014.sav
			Active Dataset	DataSet2
			Filter	<none>
			Weight	<none>
			Split File	<none>
			N of Rows in Working Data File	505
		Missing Value Handling	Definition of Missing	User-defined missing values are treated as missing.
			Cases Used	Statistics are based on all cases with valid data for all variables in the analysis.
		Syntax		KM OS_time_2010 BY mir26a1_rs7372209_C_T /STATUS=OS_status_2010(1) /PRINT MEAN /PLOT SURVIVAL /TEST LOGRANK /COMPARE OVERALL POOLED.
		Resources	Processor Time	00:00:00.14
			Elapsed Time	00:00:00.14
		[DataSet2] H:\validation study\103SNPs-codoprognostic-SPSS-Feb 12, 2014.sav
		Case Processing Summary
		mir26a-1_rs7372209_C_T	Total N	N of Events	Censored
					N	Percent
		CC	262	90	172	0.656489
		CT	193	60	133	0.689119
		TT	49	20	29	0.591837
		Overall	504	170	334	0.662698
		Means and Medians for Survival Time
		mir26a-1_rs7372209_C_T	Meana				Median
			Estimate	Std. Error	95% Confidence Interval		Estimate	Std. Error	95% Confidence Interval
					Lower Bound	Upper Bound			Lower Bound	Upper Bound
		CC	8.02413	0.220234	7.59248	8.45579	9.66027	0.546822	8.5885	10.732
		CT	8.54346	0.245866	8.06157	9.02536	9.48493
		TT	6.70074	0.363664	5.98796	7.41352
		Overall	8.23213	0.163384	7.9119	8.55236	9.48493	0.26246	8.97051	9.99935
		a. Estimation is limited to the largest survival time if it is censored.
		Overall Comparisons
			Chi-Square	df	Sig.
		Log Rank (Mantel-Cox)	3.5972	2	0.16553
		Test of equality of survival distributions for the different levels of mir26a-1_rs7372209_C_T.
recessive	mir26a-1_rs7372209_C_T
		KM OS_time_2010 BY ALCAM_rs1157_C_T
		/STATUS=OS_status_2010(1)
		/PRINT MEAN
		/PLOT SURVIVAL
		/TEST LOGRANK
		/COMPARE OVERALL POOLED.
		Kaplan-Meier
		Notes
		Output Created		12-FEB-2014 16:58:06
		Comments
		Input	Data	H:\validation study\103SNPs-codoprognostic-SPSS-Feb 12, 2014.sav
			Active Dataset	DataSet2
			Filter	<none>
			Weight	<none>
			Split File	<none>
			N of Rows in Working Data File	505
		Missing Value Handling	Definition of Missing	User-defined missing values are treated as missing.
			Cases Used	Statistics are based on all cases with valid data for all variables in the analysis.
		Syntax		KM OS_time_2010 BY ALCAM_rs1157_C_T /STATUS=OS_status_2010(1) /PRINT MEAN /PLOT SURVIVAL /TEST LOGRANK /COMPARE OVERALL POOLED.
		Resources	Processor Time	00:00:00.16
			Elapsed Time	00:00:00.14
		[DataSet2] H:\validation study\103SNPs-codoprognostic-SPSS-Feb 12, 2014.sav
		Case Processing Summary
		ALCAM_rs1157_C_T	Total N	N of Events	Censored
					N	Percent
		CC	323	118	205	0.634675
		CT	161	46	115	0.714286
		TT	20	6	14	0.7
		Overall	504	170	334	0.662698
		Means and Medians for Survival Time
		ALCAM_rs1157_C_T	Meana				Median
			Estimate	Std. Error	95% Confidence Interval		Estimate	Std. Error	95% Confidence Interval
					Lower Bound	Upper Bound			Lower Bound	Upper Bound
		CC	7.99954	0.206795	7.59422	8.40486	9.34247	0.265818	8.82146	9.86347
		CT	8.38405	0.248466	7.89706	8.87104
		TT	8.51398	0.53206	7.47115	9.55682	9.48493	1.79553	5.96569	13.0042
		Overall	8.23213	0.163384	7.9119	8.55236	9.48493	0.26246	8.97051	9.99935
		a. Estimation is limited to the largest survival time if it is censored.
		Overall Comparisons
			Chi-Square	df	Sig.
		Log Rank (Mantel-Cox)	3.45257	2	0.177944
		Test of equality of survival distributions for the different levels of ALCAM_rs1157_C_T.
recessive	ALCAM_rs1157_C_T
		KM OS_time_2010 BY CD47_rs12695175_A_C
		/STATUS=OS_status_2010(1)
		/PRINT MEAN
		/PLOT SURVIVAL
		/TEST LOGRANK
		/COMPARE OVERALL POOLED.
		Kaplan-Meier
		Notes
		Output Created		12-FEB-2014 16:58:15
		Comments
		Input	Data	H:\validation study\103SNPs-codoprognostic-SPSS-Feb 12, 2014.sav
			Active Dataset	DataSet2
			Filter	<none>
			Weight	<none>
			Split File	<none>
			N of Rows in Working Data File	505
		Missing Value Handling	Definition of Missing	User-defined missing values are treated as missing.
			Cases Used	Statistics are based on all cases with valid data for all variables in the analysis.
		Syntax		KM OS_time_2010 BY CD47_rs12695175_A_C /STATUS=OS_status_2010(1) /PRINT MEAN /PLOT SURVIVAL /TEST LOGRANK /COMPARE OVERALL POOLED.
		Resources	Processor Time	00:00:00.14
			Elapsed Time	00:00:00.13
		[DataSet2] H:\validation study\103SNPs-codoprognostic-SPSS-Feb 12, 2014.sav
		Case Processing Summary
		CD47_rs12695175_A_C	Total N	N of Events	Censored
					N	Percent
		AA	342	112	230	0.672515
		AC	149	55	94	0.630872
		CC	13	3	10	0.769231
		Overall	504	170	334	0.662698
		Means and Medians for Survival Time
		CD47_rs12695175_A_C	Meana				Median
			Estimate	Std. Error	95% Confidence Interval		Estimate	Std. Error	95% Confidence Interval
					Lower Bound	Upper Bound			Lower Bound	Upper Bound
		AA	8.32082	0.19337	7.94182	8.69983	9.48493	0.264367	8.96677	10.0031
		AC	7.90052	0.296894	7.3186	8.48243	9.33699
		CC	7.07397	0.549747	5.99647	8.15148
		Overall	8.23213	0.163384	7.9119	8.55236	9.48493	0.26246	8.97051	9.99935
		a. Estimation is limited to the largest survival time if it is censored.
		Overall Comparisons
			Chi-Square	df	Sig.
		Log Rank (Mantel-Cox)	1.39121	2	0.498773
		Test of equality of survival distributions for the different levels of CD47_rs12695175_A_C.
recessive	CD47_rs12695175_A_C
		KM OS_time_2010 BY TXNRD3_rs11718498_G_A
		/STATUS=OS_status_2010(1)
		/PRINT MEAN
		/PLOT SURVIVAL
		/TEST LOGRANK
		/COMPARE OVERALL POOLED.
		Kaplan-Meier
		Notes
		Output Created		12-FEB-2014 16:58:25
		Comments
		Input	Data	H:\validation study\103SNPs-codoprognostic-SPSS-Feb 12, 2014.sav
			Active Dataset	DataSet2
			Filter	<none>
			Weight	<none>
			Split File	<none>
			N of Rows in Working Data File	505
		Missing Value Handling	Definition of Missing	User-defined missing values are treated as missing.
			Cases Used	Statistics are based on all cases with valid data for all variables in the analysis.
		Syntax		KM OS_time_2010 BY TXNRD3_rs11718498_G_A /STATUS=OS_status_2010(1) /PRINT MEAN /PLOT SURVIVAL /TEST LOGRANK /COMPARE OVERALL POOLED.
		Resources	Processor Time	00:00:00.14
			Elapsed Time	00:00:00.14
		[DataSet2] H:\validation study\103SNPs-codoprognostic-SPSS-Feb 12, 2014.sav
		Case Processing Summary
		TXNRD3_rs11718498_G_A	Total N	N of Events	Censored
					N	Percent
		GG	156	51	105	0.673077
		GA	252	90	162	0.642857
		AA	96	29	67	0.697917
		Overall	504	170	334	0.662698
		Means and Medians for Survival Time
		TXNRD3_rs11718498_G_A	Meana				Median
			Estimate	Std. Error	95% Confidence Interval		Estimate	Std. Error	95% Confidence Interval
					Lower Bound	Upper Bound			Lower Bound	Upper Bound
		GG	8.35302	0.262821	7.8379	8.86815	9.39178	0.296607	8.81043	9.97313
		GA	7.78291	0.214212	7.36306	8.20277	9.38082
		AA	8.32156	0.31225	7.70955	8.93357
		Overall	8.23213	0.163384	7.9119	8.55236	9.48493	0.26246	8.97051	9.99935
		a. Estimation is limited to the largest survival time if it is censored.
		Overall Comparisons
			Chi-Square	df	Sig.
		Log Rank (Mantel-Cox)	1.71307	2	0.42463
		Test of equality of survival distributions for the different levels of TXNRD3_rs11718498_G_A.
codominant	TXNRD3_rs11718498_G_A
		KM OS_time_2010 BY CLOCK_rs1047354_T_C
		/STATUS=OS_status_2010(1)
		/PRINT MEAN
		/PLOT SURVIVAL
		/TEST LOGRANK
		/COMPARE OVERALL POOLED.
		Kaplan-Meier
		Notes
		Output Created		12-FEB-2014 16:58:36
		Comments
		Input	Data	H:\validation study\103SNPs-codoprognostic-SPSS-Feb 12, 2014.sav
			Active Dataset	DataSet2
			Filter	<none>
			Weight	<none>
			Split File	<none>
			N of Rows in Working Data File	505
		Missing Value Handling	Definition of Missing	User-defined missing values are treated as missing.
			Cases Used	Statistics are based on all cases with valid data for all variables in the analysis.
		Syntax		KM OS_time_2010 BY CLOCK_rs1047354_T_C /STATUS=OS_status_2010(1) /PRINT MEAN /PLOT SURVIVAL /TEST LOGRANK /COMPARE OVERALL POOLED.
		Resources	Processor Time	00:00:00.16
			Elapsed Time	00:00:00.17
		[DataSet2] H:\validation study\103SNPs-codoprognostic-SPSS-Feb 12, 2014.sav
		Case Processing Summary
		CLOCK_rs1047354_T_C	Total N	N of Events	Censored
					N	Percent
		TT	205	68	137	0.668293
		TC	234	79	155	0.662393
		CC	65	23	42	0.646154
		Overall	504	170	334	0.662698
		Means and Medians for Survival Time
		CLOCK_rs1047354_T_C	Meana				Median
			Estimate	Std. Error	95% Confidence Interval		Estimate	Std. Error	95% Confidence Interval
					Lower Bound	Upper Bound			Lower Bound	Upper Bound
		TT	8.38875	0.248939	7.90083	8.87667
		TC	8.00258	0.208282	7.59435	8.41082	9.38082	0.213488	8.96238	9.79926
		CC	7.71044	0.394992	6.93625	8.48462	9.48493	0.732083	8.05005	10.9198
		Overall	8.23213	0.163384	7.9119	8.55236	9.48493	0.26246	8.97051	9.99935
		a. Estimation is limited to the largest survival time if it is censored.
		Overall Comparisons
			Chi-Square	df	Sig.
		Log Rank (Mantel-Cox)	0.180345	2	0.913773
		Test of equality of survival distributions for the different levels of CLOCK_rs1047354_T_C.
none	CLOCK_rs1047354_T_C
		KM OS_time_2010 BY CLOCK_rs1801260_T_C
		/STATUS=OS_status_2010(1)
		/PRINT MEAN
		/PLOT SURVIVAL
		/TEST LOGRANK
		/COMPARE OVERALL POOLED.
		Kaplan-Meier
		Notes
		Output Created		12-FEB-2014 16:58:46
		Comments
		Input	Data	H:\validation study\103SNPs-codoprognostic-SPSS-Feb 12, 2014.sav
			Active Dataset	DataSet2
			Filter	<none>
			Weight	<none>
			Split File	<none>
			N of Rows in Working Data File	505
		Missing Value Handling	Definition of Missing	User-defined missing values are treated as missing.
			Cases Used	Statistics are based on all cases with valid data for all variables in the analysis.
		Syntax		KM OS_time_2010 BY CLOCK_rs1801260_T_C /STATUS=OS_status_2010(1) /PRINT MEAN /PLOT SURVIVAL /TEST LOGRANK /COMPARE OVERALL POOLED.
		Resources	Processor Time	00:00:00.13
			Elapsed Time	00:00:00.12
		[DataSet2] H:\validation study\103SNPs-codoprognostic-SPSS-Feb 12, 2014.sav
		Case Processing Summary
		CLOCK_rs1801260_T_C	Total N	N of Events	Censored
					N	Percent
		TT	278	100	178	0.640288
		TC	195	63	132	0.676923
		CC	30	7	23	0.766667
		Overall	503	170	333	0.662028
		Means and Medians for Survival Time
		CLOCK_rs1801260_T_C	Meana				Median
			Estimate	Std. Error	95% Confidence Interval		Estimate	Std. Error	95% Confidence Interval
					Lower Bound	Upper Bound			Lower Bound	Upper Bound
		TT	7.85776	0.193007	7.47947	8.23606	9.34247	0.252811	8.84696	9.83798
		TC	8.41003	0.256745	7.90681	8.91325
		CC	7.60742	0.456183	6.7133	8.50154
		Overall	8.22663	0.163578	7.90602	8.54724	9.48493	0.262756	8.96993	9.99993
		a. Estimation is limited to the largest survival time if it is censored.
		Overall Comparisons
			Chi-Square	df	Sig.
		Log Rank (Mantel-Cox)	0.913948	2	0.633197
		Test of equality of survival distributions for the different levels of CLOCK_rs1801260_T_C.
recessive	CLOCK_rs1801260_T_C
		KM OS_time_2010 BY EGF_rs4444903_A_G
		/STATUS=OS_status_2010(1)
		/PRINT MEAN
		/PLOT SURVIVAL
		/TEST LOGRANK
		/COMPARE OVERALL POOLED.
		Kaplan-Meier
		Notes
		Output Created		12-FEB-2014 16:58:54
		Comments
		Input	Data	H:\validation study\103SNPs-codoprognostic-SPSS-Feb 12, 2014.sav
			Active Dataset	DataSet2
			Filter	<none>
			Weight	<none>
			Split File	<none>
			N of Rows in Working Data File	505
		Missing Value Handling	Definition of Missing	User-defined missing values are treated as missing.
			Cases Used	Statistics are based on all cases with valid data for all variables in the analysis.
		Syntax		KM OS_time_2010 BY EGF_rs4444903_A_G /STATUS=OS_status_2010(1) /PRINT MEAN /PLOT SURVIVAL /TEST LOGRANK /COMPARE OVERALL POOLED.
		Resources	Processor Time	00:00:00.14
			Elapsed Time	00:00:00.14
		[DataSet2] H:\validation study\103SNPs-codoprognostic-SPSS-Feb 12, 2014.sav
		Case Processing Summary
		EGF_rs4444903_A_G	Total N	N of Events	Censored
					N	Percent
		AA	178	59	119	0.668539
		AG	247	79	168	0.680162
		GG	78	32	46	0.589744
		Overall	503	170	333	0.662028
		Means and Medians for Survival Time
		EGF_rs4444903_A_G	Meana				Median
			Estimate	Std. Error	95% Confidence Interval		Estimate	Std. Error	95% Confidence Interval
					Lower Bound	Upper Bound			Lower Bound	Upper Bound
		AA	8.29858	0.274011	7.76152	8.83564	10.0658
		AG	8.23208	0.221039	7.79884	8.66532	9.39178	0.385733	8.63574	10.1478
		GG	7.4083	0.334135	6.7534	8.06321	8.72603	0.786834	7.18383	10.2682
		Overall	8.21964	0.164007	7.89819	8.54109	9.48493	0.261883	8.97164	9.99822
		a. Estimation is limited to the largest survival time if it is censored.
		Overall Comparisons
			Chi-Square	df	Sig.
		Log Rank (Mantel-Cox)	1.85478	2	0.395584
		Test of equality of survival distributions for the different levels of EGF_rs4444903_A_G.
recessive	EGF_rs4444903_A_G
		KM OS_time_2010 BY IRF2_rs3822118_C_T
		/STATUS=OS_status_2010(1)
		/PRINT MEAN
		/PLOT SURVIVAL
		/TEST LOGRANK
		/COMPARE OVERALL POOLED.
		Kaplan-Meier
		Notes
		Output Created		12-FEB-2014 16:59:03
		Comments
		Input	Data	H:\validation study\103SNPs-codoprognostic-SPSS-Feb 12, 2014.sav
			Active Dataset	DataSet2
			Filter	<none>
			Weight	<none>
			Split File	<none>
			N of Rows in Working Data File	505
		Missing Value Handling	Definition of Missing	User-defined missing values are treated as missing.
			Cases Used	Statistics are based on all cases with valid data for all variables in the analysis.
		Syntax		KM OS_time_2010 BY IRF2_rs3822118_C_T /STATUS=OS_status_2010(1) /PRINT MEAN /PLOT SURVIVAL /TEST LOGRANK /COMPARE OVERALL POOLED.
		Resources	Processor Time	00:00:00.16
			Elapsed Time	00:00:00.15
		[DataSet2] H:\validation study\103SNPs-codoprognostic-SPSS-Feb 12, 2014.sav
		Case Processing Summary
		IRF2_rs3822118_C_T	Total N	N of Events	Censored
					N	Percent
		CC	226	76	150	0.663717
		CT	231	81	150	0.649351
		TT	47	13	34	0.723404
		Overall	504	170	334	0.662698
		Means and Medians for Survival Time
		IRF2_rs3822118_C_T	Meana				Median
			Estimate	Std. Error	95% Confidence Interval		Estimate	Std. Error	95% Confidence Interval
					Lower Bound	Upper Bound			Lower Bound	Upper Bound
		CC	8.24859	0.242728	7.77285	8.72434	9.39178	0.429883	8.54921	10.2344
		CT	7.87489	0.218071	7.44747	8.30231	9.38082	0.253914	8.88315	9.87849
		TT	8.51643	0.42127	7.69074	9.34212
		Overall	8.23213	0.163384	7.9119	8.55236	9.48493	0.26246	8.97051	9.99935
		a. Estimation is limited to the largest survival time if it is censored.
		Overall Comparisons
			Chi-Square	df	Sig.
		Log Rank (Mantel-Cox)	0.911215	2	0.634063
		Test of equality of survival distributions for the different levels of IRF2_rs3822118_C_T.
recessive	IRF2_rs3822118_C_T
		KM OS_time_2010 BY IRF2_rs3756094_G_A
		/STATUS=OS_status_2010(1)
		/PRINT MEAN
		/PLOT SURVIVAL
		/TEST LOGRANK
		/COMPARE OVERALL POOLED.
		Kaplan-Meier
		Notes
		Output Created		12-FEB-2014 16:59:13
		Comments
		Input	Data	H:\validation study\103SNPs-codoprognostic-SPSS-Feb 12, 2014.sav
			Active Dataset	DataSet2
			Filter	<none>
			Weight	<none>
			Split File	<none>
			N of Rows in Working Data File	505
		Missing Value Handling	Definition of Missing	User-defined missing values are treated as missing.
			Cases Used	Statistics are based on all cases with valid data for all variables in the analysis.
		Syntax		KM OS_time_2010 BY IRF2_rs3756094_G_A /STATUS=OS_status_2010(1) /PRINT MEAN /PLOT SURVIVAL /TEST LOGRANK /COMPARE OVERALL POOLED.
		Resources	Processor Time	00:00:00.12
			Elapsed Time	00:00:00.13
		[DataSet2] H:\validation study\103SNPs-codoprognostic-SPSS-Feb 12, 2014.sav
		Case Processing Summary
		IRF2_rs3756094_G_A	Total N	N of Events	Censored
					N	Percent
		GG	252	82	170	0.674603
		GA	212	74	138	0.650943
		AA	40	14	26	0.65
		Overall	504	170	334	0.662698
		Means and Medians for Survival Time
		IRF2_rs3756094_G_A	Meana				Median
			Estimate	Std. Error	95% Confidence Interval		Estimate	Std. Error	95% Confidence Interval
					Lower Bound	Upper Bound			Lower Bound	Upper Bound
		GG	8.37174	0.227935	7.92499	8.8185
		GA	7.79118	0.219344	7.36127	8.22109	9.03288	0.29713	8.4505	9.61525
		AA	7.97148	0.465682	7.05874	8.88421
		Overall	8.23213	0.163384	7.9119	8.55236	9.48493	0.26246	8.97051	9.99935
		a. Estimation is limited to the largest survival time if it is censored.
		Overall Comparisons
			Chi-Square	df	Sig.
		Log Rank (Mantel-Cox)	0.44309	2	0.80128
		Test of equality of survival distributions for the different levels of IRF2_rs3756094_G_A.
none	IRF2_rs3756094_G_A
		KM OS_time_2010 BY IRF2_rs12504466_T_C
		/STATUS=OS_status_2010(1)
		/PRINT MEAN
		/PLOT SURVIVAL
		/TEST LOGRANK
		/COMPARE OVERALL POOLED.
		Kaplan-Meier
		Notes
		Output Created		12-FEB-2014 16:59:22
		Comments
		Input	Data	H:\validation study\103SNPs-codoprognostic-SPSS-Feb 12, 2014.sav
			Active Dataset	DataSet2
			Filter	<none>
			Weight	<none>
			Split File	<none>
			N of Rows in Working Data File	505
		Missing Value Handling	Definition of Missing	User-defined missing values are treated as missing.
			Cases Used	Statistics are based on all cases with valid data for all variables in the analysis.
		Syntax		KM OS_time_2010 BY IRF2_rs12504466_T_C /STATUS=OS_status_2010(1) /PRINT MEAN /PLOT SURVIVAL /TEST LOGRANK /COMPARE OVERALL POOLED.
		Resources	Processor Time	00:00:00.16
			Elapsed Time	00:00:00.16
		[DataSet2] H:\validation study\103SNPs-codoprognostic-SPSS-Feb 12, 2014.sav
		Case Processing Summary
		IRF2_rs12504466_T_C	Total N	N of Events	Censored
					N	Percent
		TT	135	43	92	0.681481
		TC	266	92	174	0.654135
		CC	103	35	68	0.660194
		Overall	504	170	334	0.662698
		Means and Medians for Survival Time
		IRF2_rs12504466_T_C	Meana				Median
			Estimate	Std. Error	95% Confidence Interval		Estimate	Std. Error	95% Confidence Interval
					Lower Bound	Upper Bound			Lower Bound	Upper Bound
		TT	8.39992	0.312325	7.78777	9.01208
		TC	8.03031	0.217127	7.60474	8.45587	9.39178	0.284648	8.83387	9.94969
		CC	8.13515	0.303949	7.53941	8.73089	10.0658	0.875114	8.35053	11.781
		Overall	8.23213	0.163384	7.9119	8.55236	9.48493	0.26246	8.97051	9.99935
		a. Estimation is limited to the largest survival time if it is censored.
		Overall Comparisons
			Chi-Square	df	Sig.
		Log Rank (Mantel-Cox)	0.38254	2	0.825909
		Test of equality of survival distributions for the different levels of IRF2_rs12504466_T_C.
none	IRF2_rs12504466_T_C
		KM OS_time_2010 BY IRF2_rs7685698_T_C
		/STATUS=OS_status_2010(1)
		/PRINT MEAN
		/PLOT SURVIVAL
		/TEST LOGRANK
		/COMPARE OVERALL POOLED.
		Kaplan-Meier
		Notes
		Output Created		12-FEB-2014 16:59:30
		Comments
		Input	Data	H:\validation study\103SNPs-codoprognostic-SPSS-Feb 12, 2014.sav
			Active Dataset	DataSet2
			Filter	<none>
			Weight	<none>
			Split File	<none>
			N of Rows in Working Data File	505
		Missing Value Handling	Definition of Missing	User-defined missing values are treated as missing.
			Cases Used	Statistics are based on all cases with valid data for all variables in the analysis.
		Syntax		KM OS_time_2010 BY IRF2_rs7685698_T_C /STATUS=OS_status_2010(1) /PRINT MEAN /PLOT SURVIVAL /TEST LOGRANK /COMPARE OVERALL POOLED.
		Resources	Processor Time	00:00:00.16
			Elapsed Time	00:00:00.15
		[DataSet2] H:\validation study\103SNPs-codoprognostic-SPSS-Feb 12, 2014.sav
		Case Processing Summary
		IRF2_rs7685698_T_C	Total N	N of Events	Censored
					N	Percent
		TT	368	119	249	0.67663
		TC	131	49	82	0.625954
		CC	5	2	3	0.6
		Overall	504	170	334	0.662698
		Means and Medians for Survival Time
		IRF2_rs7685698_T_C	Meana				Median
			Estimate	Std. Error	95% Confidence Interval		Estimate	Std. Error	95% Confidence Interval
					Lower Bound	Upper Bound			Lower Bound	Upper Bound
		TT	8.34915	0.186528	7.98355	8.71474	9.39178	0.271342	8.85995	9.92361
		TC	7.75157	0.294753	7.17386	8.32929	9.48493
		CC	5.40219	1.44498	2.57003	8.23435
		Overall	8.23213	0.163384	7.9119	8.55236	9.48493	0.26246	8.97051	9.99935
		a. Estimation is limited to the largest survival time if it is censored.
		Overall Comparisons
			Chi-Square	df	Sig.
		Log Rank (Mantel-Cox)	1.88564	2	0.389528
		Test of equality of survival distributions for the different levels of IRF2_rs7685698_T_C.
dominant	IRF2_rs7685698_T_C
		KM OS_time_2010 BY IRF2_rs13116389_G_T
		/STATUS=OS_status_2010(1)
		/PRINT MEAN
		/PLOT SURVIVAL
		/TEST LOGRANK
		/COMPARE OVERALL POOLED.
		Kaplan-Meier
		Notes
		Output Created		12-FEB-2014 16:59:40
		Comments
		Input	Data	H:\validation study\103SNPs-codoprognostic-SPSS-Feb 12, 2014.sav
			Active Dataset	DataSet2
			Filter	<none>
			Weight	<none>
			Split File	<none>
			N of Rows in Working Data File	505
		Missing Value Handling	Definition of Missing	User-defined missing values are treated as missing.
			Cases Used	Statistics are based on all cases with valid data for all variables in the analysis.
		Syntax		KM OS_time_2010 BY IRF2_rs13116389_G_T /STATUS=OS_status_2010(1) /PRINT MEAN /PLOT SURVIVAL /TEST LOGRANK /COMPARE OVERALL POOLED.
		Resources	Processor Time	00:00:00.19
			Elapsed Time	00:00:00.14
		[DataSet2] H:\validation study\103SNPs-codoprognostic-SPSS-Feb 12, 2014.sav
		Case Processing Summary
		IRF2_rs13116389_G_T	Total N	N of Events	Censored
					N	Percent
		GG	342	114	228	0.666667
		GT	153	52	101	0.660131
		TT	9	4	5	0.555556
		Overall	504	170	334	0.662698
		Means and Medians for Survival Time
		IRF2_rs13116389_G_T	Meana				Median
			Estimate	Std. Error	95% Confidence Interval		Estimate	Std. Error	95% Confidence Interval
					Lower Bound	Upper Bound			Lower Bound	Upper Bound
		GG	8.25109	0.195343	7.86822	8.63396	9.39178	0.283818	8.8355	9.94806
		GT	8.03267	0.2628	7.51759	8.54776
		TT	6.0444	1.00802	4.06869	8.02011
		Overall	8.23213	0.163384	7.9119	8.55236	9.48493	0.26246	8.97051	9.99935
		a. Estimation is limited to the largest survival time if it is censored.
		Overall Comparisons
			Chi-Square	df	Sig.
		Log Rank (Mantel-Cox)	1.73064	2	0.420917
		Test of equality of survival distributions for the different levels of IRF2_rs13116389_G_T.
none	IRF2_rs13116389_G_T
		KM OS_time_2010 BY IRF2_rs3775582_G_A
		/STATUS=OS_status_2010(1)
		/PRINT MEAN
		/PLOT SURVIVAL
		/TEST LOGRANK
		/COMPARE OVERALL POOLED.
		Kaplan-Meier
		Notes
		Output Created		12-FEB-2014 16:59:49
		Comments
		Input	Data	H:\validation study\103SNPs-codoprognostic-SPSS-Feb 12, 2014.sav
			Active Dataset	DataSet2
			Filter	<none>
			Weight	<none>
			Split File	<none>
			N of Rows in Working Data File	505
		Missing Value Handling	Definition of Missing	User-defined missing values are treated as missing.
			Cases Used	Statistics are based on all cases with valid data for all variables in the analysis.
		Syntax		KM OS_time_2010 BY IRF2_rs3775582_G_A /STATUS=OS_status_2010(1) /PRINT MEAN /PLOT SURVIVAL /TEST LOGRANK /COMPARE OVERALL POOLED.
		Resources	Processor Time	00:00:00.12
			Elapsed Time	00:00:00.13
		[DataSet2] H:\validation study\103SNPs-codoprognostic-SPSS-Feb 12, 2014.sav
		Case Processing Summary
		IRF2_rs3775582_G_A	Total N	N of Events	Censored
					N	Percent
		GG	392	134	258	0.658163
		GA	104	35	69	0.663462
		AA	8	1	7	0.875
		Overall	504	170	334	0.662698
		Means and Medians for Survival Time
		IRF2_rs3775582_G_A	Meana				Median
			Estimate	Std. Error	95% Confidence Interval		Estimate	Std. Error	95% Confidence Interval
					Lower Bound	Upper Bound			Lower Bound	Upper Bound
		GG	8.24991	0.183178	7.89088	8.60894	9.66027	0.418666	8.83969	10.4809
		GA	7.90297	0.325764	7.26448	8.54147	9.38082	0.332268	8.72958	10.0321
		AA	8.52055	0.861094	6.8328	10.2083
		Overall	8.23213	0.163384	7.9119	8.55236	9.48493	0.26246	8.97051	9.99935
		a. Estimation is limited to the largest survival time if it is censored.
		Overall Comparisons
			Chi-Square	df	Sig.
		Log Rank (Mantel-Cox)	0.703014	2	0.703627
		Test of equality of survival distributions for the different levels of IRF2_rs3775582_G_A.
none	IRF2_rs3775582_G_A
		KM OS_time_2010 BY MAP3K1_rs11960484_G_A
		/STATUS=OS_status_2010(1)
		/PRINT MEAN
		/PLOT SURVIVAL
		/TEST LOGRANK
		/COMPARE OVERALL POOLED.
		Kaplan-Meier
		Notes
		Output Created		12-FEB-2014 16:59:57
		Comments
		Input	Data	H:\validation study\103SNPs-codoprognostic-SPSS-Feb 12, 2014.sav
			Active Dataset	DataSet2
			Filter	<none>
			Weight	<none>
			Split File	<none>
			N of Rows in Working Data File	505
		Missing Value Handling	Definition of Missing	User-defined missing values are treated as missing.
			Cases Used	Statistics are based on all cases with valid data for all variables in the analysis.
		Syntax		KM OS_time_2010 BY MAP3K1_rs11960484_G_A /STATUS=OS_status_2010(1) /PRINT MEAN /PLOT SURVIVAL /TEST LOGRANK /COMPARE OVERALL POOLED.
		Resources	Processor Time	00:00:00.14
			Elapsed Time	00:00:00.14
		[DataSet2] H:\validation study\103SNPs-codoprognostic-SPSS-Feb 12, 2014.sav
		Case Processing Summary
		MAP3K1 _rs11960484_G_A	Total N	N of Events	Censored
					N	Percent
		GG	195	65	130	0.666667
		GA	233	78	155	0.665236
		AA	76	27	49	0.644737
		Overall	504	170	334	0.662698
		Means and Medians for Survival Time
		MAP3K1 _rs11960484_G_A	Meana				Median
			Estimate	Std. Error	95% Confidence Interval		Estimate	Std. Error	95% Confidence Interval
					Lower Bound	Upper Bound			Lower Bound	Upper Bound
		GG	8.25789	0.244221	7.77922	8.73656
		GA	8.11936	0.250554	7.62828	8.61045	9.34247	0.620412	8.12646	10.5585
		AA	7.82039	0.351105	7.13223	8.50856	9.03288	0.270272	8.50314	9.56261
		Overall	8.23213	0.163384	7.9119	8.55236	9.48493	0.26246	8.97051	9.99935
		a. Estimation is limited to the largest survival time if it is censored.
		Overall Comparisons
			Chi-Square	df	Sig.
		Log Rank (Mantel-Cox)	0.259655	2	0.878247
		Test of equality of survival distributions for the different levels of MAP3K1 _rs11960484_G_A.
none	MAP3K1 _rs11960484_G_A
		KM OS_time_2010 BY MSH3_rs26784_T_C
		/STATUS=OS_status_2010(1)
		/PRINT MEAN
		/PLOT SURVIVAL
		/TEST LOGRANK
		/COMPARE OVERALL POOLED.
		Kaplan-Meier
		Notes
		Output Created		12-FEB-2014 17:00:06
		Comments
		Input	Data	H:\validation study\103SNPs-codoprognostic-SPSS-Feb 12, 2014.sav
			Active Dataset	DataSet2
			Filter	<none>
			Weight	<none>
			Split File	<none>
			N of Rows in Working Data File	505
		Missing Value Handling	Definition of Missing	User-defined missing values are treated as missing.
			Cases Used	Statistics are based on all cases with valid data for all variables in the analysis.
		Syntax		KM OS_time_2010 BY MSH3_rs26784_T_C /STATUS=OS_status_2010(1) /PRINT MEAN /PLOT SURVIVAL /TEST LOGRANK /COMPARE OVERALL POOLED.
		Resources	Processor Time	00:00:00.14
			Elapsed Time	00:00:00.14
		[DataSet2] H:\validation study\103SNPs-codoprognostic-SPSS-Feb 12, 2014.sav
		Case Processing Summary
		MSH3_rs26784_T_C	Total N	N of Events	Censored
					N	Percent
		TT	182	61	121	0.664835
		TC	243	81	162	0.666667
		CC	79	28	51	0.64557
		Overall	504	170	334	0.662698
		Means and Medians for Survival Time
		MSH3_rs26784_T_C	Meana				Median
			Estimate	Std. Error	95% Confidence Interval		Estimate	Std. Error	95% Confidence Interval
					Lower Bound	Upper Bound			Lower Bound	Upper Bound
		TT	8.05264	0.274636	7.51435	8.59092	9.34247
		TC	8.30108	0.226486	7.85717	8.74499	9.48493	0.17933	9.13345	9.83642
		CC	7.94601	0.329762	7.29968	8.59234	9.03288
		Overall	8.23213	0.163384	7.9119	8.55236	9.48493	0.26246	8.97051	9.99935
		a. Estimation is limited to the largest survival time if it is censored.
		Overall Comparisons
			Chi-Square	df	Sig.
		Log Rank (Mantel-Cox)	0.19509	2	0.907062
		Test of equality of survival distributions for the different levels of MSH3_rs26784_T_C.
none	MSH3_rs26784_T_C
		KM OS_time_2010 BY IL3_rs181781_G_A
		/STATUS=OS_status_2010(1)
		/PRINT MEAN
		/PLOT SURVIVAL
		/TEST LOGRANK
		/COMPARE OVERALL POOLED.
		Kaplan-Meier
		Notes
		Output Created		12-FEB-2014 17:00:16
		Comments
		Input	Data	H:\validation study\103SNPs-codoprognostic-SPSS-Feb 12, 2014.sav
			Active Dataset	DataSet2
			Filter	<none>
			Weight	<none>
			Split File	<none>
			N of Rows in Working Data File	505
		Missing Value Handling	Definition of Missing	User-defined missing values are treated as missing.
			Cases Used	Statistics are based on all cases with valid data for all variables in the analysis.
		Syntax		KM OS_time_2010 BY IL3_rs181781_G_A /STATUS=OS_status_2010(1) /PRINT MEAN /PLOT SURVIVAL /TEST LOGRANK /COMPARE OVERALL POOLED.
		Resources	Processor Time	00:00:00.16
			Elapsed Time	00:00:00.14
		[DataSet2] H:\validation study\103SNPs-codoprognostic-SPSS-Feb 12, 2014.sav
		Case Processing Summary
		IL3_rs181781_G_A	Total N	N of Events	Censored
					N	Percent
		GG	412	144	268	0.650485
		GA	87	25	62	0.712644
		AA	5	1	4	0.8
		Overall	504	170	334	0.662698
		Means and Medians for Survival Time
		IL3_rs181781_G_A	Meana				Median
			Estimate	Std. Error	95% Confidence Interval		Estimate	Std. Error	95% Confidence Interval
					Lower Bound	Upper Bound			Lower Bound	Upper Bound
		GG	8.07603	0.171913	7.73908	8.41298	9.48493	0.280762	8.93464	10.0352
		GA	8.38787	0.407274	7.58961	9.18613	9.39178	0.715321	7.98975	10.7938
		AA	9.02009	0.730746	7.58783	10.4524
		Overall	8.23213	0.163384	7.9119	8.55236	9.48493	0.26246	8.97051	9.99935
		a. Estimation is limited to the largest survival time if it is censored.
		Overall Comparisons
			Chi-Square	df	Sig.
		Log Rank (Mantel-Cox)	1.31513	2	0.518112
		Test of equality of survival distributions for the different levels of IL3_rs181781_G_A.
dominant	IL3_rs181781_G_A
		KM OS_time_2010 BY mir2191_rs213210_T_C
		/STATUS=OS_status_2010(1)
		/PRINT MEAN
		/PLOT SURVIVAL
		/TEST LOGRANK
		/COMPARE OVERALL POOLED.
		Kaplan-Meier
		Notes
		Output Created		12-FEB-2014 17:00:25
		Comments
		Input	Data	H:\validation study\103SNPs-codoprognostic-SPSS-Feb 12, 2014.sav
			Active Dataset	DataSet2
			Filter	<none>
			Weight	<none>
			Split File	<none>
			N of Rows in Working Data File	505
		Missing Value Handling	Definition of Missing	User-defined missing values are treated as missing.
			Cases Used	Statistics are based on all cases with valid data for all variables in the analysis.
		Syntax		KM OS_time_2010 BY mir2191_rs213210_T_C /STATUS=OS_status_2010(1) /PRINT MEAN /PLOT SURVIVAL /TEST LOGRANK /COMPARE OVERALL POOLED.
		Resources	Processor Time	00:00:00.14
			Elapsed Time	00:00:00.15
		[DataSet2] H:\validation study\103SNPs-codoprognostic-SPSS-Feb 12, 2014.sav
		Case Processing Summary
		mir219-1_rs213210_T_C	Total N	N of Events	Censored
					N	Percent
		TT	426	148	278	0.652582
		TC	72	20	52	0.722222
		CC	6	2	4	0.666667
		Overall	504	170	334	0.662698
		Means and Medians for Survival Time
		mir219-1_rs213210_T_C	Meana				Median
			Estimate	Std. Error	95% Confidence Interval		Estimate	Std. Error	95% Confidence Interval
					Lower Bound	Upper Bound			Lower Bound	Upper Bound
		TT	8.19189	0.177039	7.8449	8.53889	9.39178	0.36102	8.68418	10.0994
		TC	8.29789	0.383605	7.54602	9.04975	9.48493
		CC	6.19132	1.12245	3.99131	8.39133
		Overall	8.23213	0.163384	7.9119	8.55236	9.48493	0.26246	8.97051	9.99935
		a. Estimation is limited to the largest survival time if it is censored.
		Overall Comparisons
			Chi-Square	df	Sig.
		Log Rank (Mantel-Cox)	1.08513	2	0.581255
		Test of equality of survival distributions for the different levels of mir219-1_rs213210_T_C.
dominant	mir219-1_rs213210_T_C
		KM OS_time_2010 BY XPO5_rs11077_A_C
		/STATUS=OS_status_2010(1)
		/PRINT MEAN
		/PLOT SURVIVAL
		/TEST LOGRANK
		/COMPARE OVERALL POOLED.
		Kaplan-Meier
		Notes
		Output Created		12-FEB-2014 17:00:33
		Comments
		Input	Data	H:\validation study\103SNPs-codoprognostic-SPSS-Feb 12, 2014.sav
			Active Dataset	DataSet2
			Filter	<none>
			Weight	<none>
			Split File	<none>
			N of Rows in Working Data File	505
		Missing Value Handling	Definition of Missing	User-defined missing values are treated as missing.
			Cases Used	Statistics are based on all cases with valid data for all variables in the analysis.
		Syntax		KM OS_time_2010 BY XPO5_rs11077_A_C /STATUS=OS_status_2010(1) /PRINT MEAN /PLOT SURVIVAL /TEST LOGRANK /COMPARE OVERALL POOLED.
		Resources	Processor Time	00:00:00.16
			Elapsed Time	00:00:00.14
		[DataSet2] H:\validation study\103SNPs-codoprognostic-SPSS-Feb 12, 2014.sav
		Case Processing Summary
		XPO5 _rs11077_A_C	Total N	N of Events	Censored
					N	Percent
		AA	173	59	114	0.65896
		AC	241	78	163	0.676349
		CC	90	33	57	0.633333
		Overall	504	170	334	0.662698
		Means and Medians for Survival Time
		XPO5 _rs11077_A_C	Meana				Median
			Estimate	Std. Error	95% Confidence Interval		Estimate	Std. Error	95% Confidence Interval
					Lower Bound	Upper Bound			Lower Bound	Upper Bound
		AA	8.28746	0.27055	7.75718	8.81774	9.66027	0.500662	8.67898	10.6416
		AC	8.021	0.210093	7.60922	8.43278	9.39178	0.087646	9.21999	9.56357
		CC	7.71894	0.341592	7.04942	8.38846
		Overall	8.23213	0.163384	7.9119	8.55236	9.48493	0.26246	8.97051	9.99935
		a. Estimation is limited to the largest survival time if it is censored.
		Overall Comparisons
			Chi-Square	df	Sig.
		Log Rank (Mantel-Cox)	0.472931	2	0.789413
		Test of equality of survival distributions for the different levels of XPO5 _rs11077_A_C.
recessive	XPO5 _rs11077_A_C
		KM OS_time_2010 BY IFNGR1_rs9376267_C_T
		/STATUS=OS_status_2010(1)
		/PRINT MEAN
		/PLOT SURVIVAL
		/TEST LOGRANK
		/COMPARE OVERALL POOLED.
		Kaplan-Meier
		Notes
		Output Created		12-FEB-2014 17:00:43
		Comments
		Input	Data	H:\validation study\103SNPs-codoprognostic-SPSS-Feb 12, 2014.sav
			Active Dataset	DataSet2
			Filter	<none>
			Weight	<none>
			Split File	<none>
			N of Rows in Working Data File	505
		Missing Value Handling	Definition of Missing	User-defined missing values are treated as missing.
			Cases Used	Statistics are based on all cases with valid data for all variables in the analysis.
		Syntax		KM OS_time_2010 BY IFNGR1_rs9376267_C_T /STATUS=OS_status_2010(1) /PRINT MEAN /PLOT SURVIVAL /TEST LOGRANK /COMPARE OVERALL POOLED.
		Resources	Processor Time	00:00:00.13
			Elapsed Time	00:00:00.13
		[DataSet2] H:\validation study\103SNPs-codoprognostic-SPSS-Feb 12, 2014.sav
		Case Processing Summary
		IFNGR1_rs9376267_C_T	Total N	N of Events	Censored
					N	Percent
		CC	305	100	205	0.672131
		CT	166	57	109	0.656627
		TT	33	13	20	0.606061
		Overall	504	170	334	0.662698
		Means and Medians for Survival Time
		IFNGR1_rs9376267_C_T	Meana				Median
			Estimate	Std. Error	95% Confidence Interval		Estimate	Std. Error	95% Confidence Interval
					Lower Bound	Upper Bound			Lower Bound	Upper Bound
		CC	8.12052	0.183727	7.76041	8.48062	10.0658
		CT	7.95187	0.277116	7.40873	8.49502	9.34247	0.190947	8.96821	9.71672
		TT	8.07476	0.594769	6.90901	9.24051	9.48493	2.83562	3.92712	15.0427
		Overall	8.23213	0.163384	7.9119	8.55236	9.48493	0.26246	8.97051	9.99935
		a. Estimation is limited to the largest survival time if it is censored.
		Overall Comparisons
			Chi-Square	df	Sig.
		Log Rank (Mantel-Cox)	0.48796	2	0.783503
		Test of equality of survival distributions for the different levels of IFNGR1_rs9376267_C_T.
recessive	IFNGR1_rs9376267_C_T
		KM OS_time_2010 BY IFNGR1_rs1327474_A_G
		/STATUS=OS_status_2010(1)
		/PRINT MEAN
		/PLOT SURVIVAL
		/TEST LOGRANK
		/COMPARE OVERALL POOLED.
		Kaplan-Meier
		Notes
		Output Created		12-FEB-2014 17:00:52
		Comments
		Input	Data	H:\validation study\103SNPs-codoprognostic-SPSS-Feb 12, 2014.sav
			Active Dataset	DataSet2
			Filter	<none>
			Weight	<none>
			Split File	<none>
			N of Rows in Working Data File	505
		Missing Value Handling	Definition of Missing	User-defined missing values are treated as missing.
			Cases Used	Statistics are based on all cases with valid data for all variables in the analysis.
		Syntax		KM OS_time_2010 BY IFNGR1_rs1327474_A_G /STATUS=OS_status_2010(1) /PRINT MEAN /PLOT SURVIVAL /TEST LOGRANK /COMPARE OVERALL POOLED.
		Resources	Processor Time	00:00:00.14
			Elapsed Time	00:00:00.13
		[DataSet2] H:\validation study\103SNPs-codoprognostic-SPSS-Feb 12, 2014.sav
		Case Processing Summary
		IFNGR1_rs1327474_A_G	Total N	N of Events	Censored
					N	Percent
		AA	145	62	83	0.572414
		AG	238	72	166	0.697479
		GG	121	36	85	0.702479
		Overall	504	170	334	0.662698
		Means and Medians for Survival Time
		IFNGR1_rs1327474_A_G	Meana				Median
			Estimate	Std. Error	95% Confidence Interval		Estimate	Std. Error	95% Confidence Interval
					Lower Bound	Upper Bound			Lower Bound	Upper Bound
		AA	7.46988	0.319755	6.84317	8.0966	8.85753	0.662806	7.55843	10.1566
		AG	8.35874	0.214481	7.93836	8.77912	9.38082	0.191843	9.00481	9.75683
		GG	8.34238	0.286916	7.78002	8.90473
		Overall	8.23213	0.163384	7.9119	8.55236	9.48493	0.26246	8.97051	9.99935
		a. Estimation is limited to the largest survival time if it is censored.
		Overall Comparisons
			Chi-Square	df	Sig.
		Log Rank (Mantel-Cox)	8.88989	2	0.0117378
		Test of equality of survival distributions for the different levels of IFNGR1_rs1327474_A_G.
dominant	IFNGR1_rs1327474_A_G
		KM OS_time_2010 BY TNFAIP3_rs6920220_G_A
		/STATUS=OS_status_2010(1)
		/PRINT MEAN
		/PLOT SURVIVAL
		/TEST LOGRANK
		/COMPARE OVERALL POOLED.
		Kaplan-Meier
		Notes
		Output Created		12-FEB-2014 17:01:03
		Comments
		Input	Data	H:\validation study\103SNPs-codoprognostic-SPSS-Feb 12, 2014.sav
			Active Dataset	DataSet2
			Filter	<none>
			Weight	<none>
			Split File	<none>
			N of Rows in Working Data File	505
		Missing Value Handling	Definition of Missing	User-defined missing values are treated as missing.
			Cases Used	Statistics are based on all cases with valid data for all variables in the analysis.
		Syntax		KM OS_time_2010 BY TNFAIP3_rs6920220_G_A /STATUS=OS_status_2010(1) /PRINT MEAN /PLOT SURVIVAL /TEST LOGRANK /COMPARE OVERALL POOLED.
		Resources	Processor Time	00:00:00.14
			Elapsed Time	00:00:00.14
		[DataSet2] H:\validation study\103SNPs-codoprognostic-SPSS-Feb 12, 2014.sav
		Case Processing Summary
		TNFAIP3_rs6920220_G_A	Total N	N of Events	Censored
					N	Percent
		GG	286	102	184	0.643357
		GA	182	60	122	0.67033
		AA	36	8	28	0.777778
		Overall	504	170	334	0.662698
		Means and Medians for Survival Time
		TNFAIP3_rs6920220_G_A	Meana				Median
			Estimate	Std. Error	95% Confidence Interval		Estimate	Std. Error	95% Confidence Interval
					Lower Bound	Upper Bound			Lower Bound	Upper Bound
		GG	8.12996	0.211693	7.71504	8.54488	9.34247	0.254212	8.84421	9.84072
		GA	8.17108	0.262753	7.65609	8.68608
		AA	8.35111	0.440195	7.48833	9.2139	9.39178	2.1794	5.12016	13.6634
		Overall	8.23213	0.163384	7.9119	8.55236	9.48493	0.26246	8.97051	9.99935
		a. Estimation is limited to the largest survival time if it is censored.
		Overall Comparisons
			Chi-Square	df	Sig.
		Log Rank (Mantel-Cox)	1.95164	2	0.376882
		Test of equality of survival distributions for the different levels of TNFAIP3_rs6920220_G_A.
recessive	TNFAIP3_rs6920220_G_A
		KM OS_time_2010 BY MACC1_rs1990172_T_G
		/STATUS=OS_status_2010(1)
		/PRINT MEAN
		/PLOT SURVIVAL
		/TEST LOGRANK
		/COMPARE OVERALL POOLED.
		Kaplan-Meier
		Notes
		Output Created		12-FEB-2014 17:01:13
		Comments
		Input	Data	H:\validation study\103SNPs-codoprognostic-SPSS-Feb 12, 2014.sav
			Active Dataset	DataSet2
			Filter	<none>
			Weight	<none>
			Split File	<none>
			N of Rows in Working Data File	505
		Missing Value Handling	Definition of Missing	User-defined missing values are treated as missing.
			Cases Used	Statistics are based on all cases with valid data for all variables in the analysis.
		Syntax		KM OS_time_2010 BY MACC1_rs1990172_T_G /STATUS=OS_status_2010(1) /PRINT MEAN /PLOT SURVIVAL /TEST LOGRANK /COMPARE OVERALL POOLED.
		Resources	Processor Time	00:00:00.16
			Elapsed Time	00:00:00.15
		[DataSet2] H:\validation study\103SNPs-codoprognostic-SPSS-Feb 12, 2014.sav
		Case Processing Summary
		MACC1_rs1990172_T_G	Total N	N of Events	Censored
					N	Percent
		TT	265	94	171	0.645283
		TG	210	65	145	0.690476
		GG	29	11	18	0.62069
		Overall	504	170	334	0.662698
		Means and Medians for Survival Time
		MACC1_rs1990172_T_G	Meana				Median
			Estimate	Std. Error	95% Confidence Interval		Estimate	Std. Error	95% Confidence Interval
					Lower Bound	Upper Bound			Lower Bound	Upper Bound
		TT	8.12415	0.204743	7.72285	8.52545	9.38082	0.231436	8.92721	9.83444
		TG	8.1124	0.234971	7.65186	8.57295
		GG	7.91213	0.622039	6.69293	9.13132	8.85753	0.98805	6.92096	10.7941
		Overall	8.23213	0.163384	7.9119	8.55236	9.48493	0.26246	8.97051	9.99935
		a. Estimation is limited to the largest survival time if it is censored.
		Overall Comparisons
			Chi-Square	df	Sig.
		Log Rank (Mantel-Cox)	0.225331	2	0.89345
		Test of equality of survival distributions for the different levels of MACC1_rs1990172_T_G.
none	MACC1_rs1990172_T_G
		KM OS_time_2010 BY EZH2_rs3757441_T_C
		/STATUS=OS_status_2010(1)
		/PRINT MEAN
		/PLOT SURVIVAL
		/TEST LOGRANK
		/COMPARE OVERALL POOLED.
		Kaplan-Meier
		Notes
		Output Created		12-FEB-2014 17:01:22
		Comments
		Input	Data	H:\validation study\103SNPs-codoprognostic-SPSS-Feb 12, 2014.sav
			Active Dataset	DataSet2
			Filter	<none>
			Weight	<none>
			Split File	<none>
			N of Rows in Working Data File	505
		Missing Value Handling	Definition of Missing	User-defined missing values are treated as missing.
			Cases Used	Statistics are based on all cases with valid data for all variables in the analysis.
		Syntax		KM OS_time_2010 BY EZH2_rs3757441_T_C /STATUS=OS_status_2010(1) /PRINT MEAN /PLOT SURVIVAL /TEST LOGRANK /COMPARE OVERALL POOLED.
		Resources	Processor Time	00:00:00.13
			Elapsed Time	00:00:00.14
		[DataSet2] H:\validation study\103SNPs-codoprognostic-SPSS-Feb 12, 2014.sav
		Case Processing Summary
		EZH2_rs3757441_T_C	Total N	N of Events	Censored
					N	Percent
		TT	246	87	159	0.646341
		TC	208	68	140	0.673077
		CC	50	15	35	0.7
		Overall	504	170	334	0.662698
		Means and Medians for Survival Time
		EZH2_rs3757441_T_C	Meana				Median
			Estimate	Std. Error	95% Confidence Interval		Estimate	Std. Error	95% Confidence Interval
					Lower Bound	Upper Bound			Lower Bound	Upper Bound
		TT	8.00356	0.226683	7.55926	8.44786	9.48493
		TC	8.28992	0.252471	7.79507	8.78476	9.34247	0.32721	8.70113	9.9838
		CC	8.48131	0.378048	7.74034	9.22228	10.0658	0
		Overall	8.23213	0.163384	7.9119	8.55236	9.48493	0.26246	8.97051	9.99935
		a. Estimation is limited to the largest survival time if it is censored.
		Overall Comparisons
			Chi-Square	df	Sig.
		Log Rank (Mantel-Cox)	1.01118	2	0.603148
		Test of equality of survival distributions for the different levels of EZH2_rs3757441_T_C.
recessive	EZH2_rs3757441_T_C
		KM OS_time_2010 BY EBF2_rs4568629_A_G
		/STATUS=OS_status_2010(1)
		/PRINT MEAN
		/PLOT SURVIVAL
		/TEST LOGRANK
		/COMPARE OVERALL POOLED.
		Kaplan-Meier
		Notes
		Output Created		12-FEB-2014 17:01:31
		Comments
		Input	Data	H:\validation study\103SNPs-codoprognostic-SPSS-Feb 12, 2014.sav
			Active Dataset	DataSet2
			Filter	<none>
			Weight	<none>
			Split File	<none>
			N of Rows in Working Data File	505
		Missing Value Handling	Definition of Missing	User-defined missing values are treated as missing.
			Cases Used	Statistics are based on all cases with valid data for all variables in the analysis.
		Syntax		KM OS_time_2010 BY EBF2_rs4568629_A_G /STATUS=OS_status_2010(1) /PRINT MEAN /PLOT SURVIVAL /TEST LOGRANK /COMPARE OVERALL POOLED.
		Resources	Processor Time	00:00:00.16
			Elapsed Time	00:00:00.15
		[DataSet2] H:\validation study\103SNPs-codoprognostic-SPSS-Feb 12, 2014.sav
		Case Processing Summary
		EBF2_rs4568629_A_G	Total N	N of Events	Censored
					N	Percent
		AA	129	44	85	0.658915
		AG	272	90	182	0.669118
		GG	103	36	67	0.650485
		Overall	504	170	334	0.662698
		Means and Medians for Survival Time
		EBF2_rs4568629_A_G	Meana				Median
			Estimate	Std. Error	95% Confidence Interval		Estimate	Std. Error	95% Confidence Interval
					Lower Bound	Upper Bound			Lower Bound	Upper Bound
		AA	8.19682	0.300108	7.60861	8.78504
		AG	7.97951	0.202497	7.58262	8.37641	9.48493	0.155843	9.17948	9.79038
		GG	8.12668	0.353947	7.43294	8.82042	9.03288	0.651804	7.75534	10.3104
		Overall	8.23213	0.163384	7.9119	8.55236	9.48493	0.26246	8.97051	9.99935
		a. Estimation is limited to the largest survival time if it is censored.
		Overall Comparisons
			Chi-Square	df	Sig.
		Log Rank (Mantel-Cox)	0.0963098	2	0.952986
		Test of equality of survival distributions for the different levels of EBF2_rs4568629_A_G.
none	EBF2_rs4568629_A_G
		KM OS_time_2010 BY ANGPT1_rs1954727_C_G
		/STATUS=OS_status_2010(1)
		/PRINT MEAN
		/PLOT SURVIVAL
		/TEST LOGRANK
		/COMPARE OVERALL POOLED.
		Kaplan-Meier
		Notes
		Output Created		12-FEB-2014 17:01:40
		Comments
		Input	Data	H:\validation study\103SNPs-codoprognostic-SPSS-Feb 12, 2014.sav
			Active Dataset	DataSet2
			Filter	<none>
			Weight	<none>
			Split File	<none>
			N of Rows in Working Data File	505
		Missing Value Handling	Definition of Missing	User-defined missing values are treated as missing.
			Cases Used	Statistics are based on all cases with valid data for all variables in the analysis.
		Syntax		KM OS_time_2010 BY ANGPT1_rs1954727_C_G /STATUS=OS_status_2010(1) /PRINT MEAN /PLOT SURVIVAL /TEST LOGRANK /COMPARE OVERALL POOLED.
		Resources	Processor Time	00:00:00.14
			Elapsed Time	00:00:00.14
		[DataSet2] H:\validation study\103SNPs-codoprognostic-SPSS-Feb 12, 2014.sav
		Case Processing Summary
		ANGPT1_rs1954727_C_G	Total N	N of Events	Censored
					N	Percent
		CC	246	81	165	0.670732
		CG	217	72	145	0.668203
		GG	41	17	24	0.585366
		Overall	504	170	334	0.662698
		Means and Medians for Survival Time
		ANGPT1_rs1954727_C_G	Meana				Median
			Estimate	Std. Error	95% Confidence Interval		Estimate	Std. Error	95% Confidence Interval
					Lower Bound	Upper Bound			Lower Bound	Upper Bound
		CC	8.06861	0.203953	7.66886	8.46835	10.0658	0.736663	8.62189	11.5096
		CG	8.25857	0.248036	7.77242	8.74472	9.48493	0.274696	8.94653	10.0233
		GG	7.34988	0.526528	6.31788	8.38187
		Overall	8.23213	0.163384	7.9119	8.55236	9.48493	0.26246	8.97051	9.99935
		a. Estimation is limited to the largest survival time if it is censored.
		Overall Comparisons
			Chi-Square	df	Sig.
		Log Rank (Mantel-Cox)	1.92676	2	0.381602
		Test of equality of survival distributions for the different levels of ANGPT1_rs1954727_C_G.
recessive	ANGPT1_rs1954727_C_G
		KM OS_time_2010 BY near_POU5F1B_rs10505477_T_C
		/STATUS=OS_status_2010(1)
		/PRINT MEAN
		/PLOT SURVIVAL
		/TEST LOGRANK
		/COMPARE OVERALL POOLED.
		Kaplan-Meier
		Notes
		Output Created		12-FEB-2014 17:01:50
		Comments
		Input	Data	H:\validation study\103SNPs-codoprognostic-SPSS-Feb 12, 2014.sav
			Active Dataset	DataSet2
			Filter	<none>
			Weight	<none>
			Split File	<none>
			N of Rows in Working Data File	505
		Missing Value Handling	Definition of Missing	User-defined missing values are treated as missing.
			Cases Used	Statistics are based on all cases with valid data for all variables in the analysis.
		Syntax		KM OS_time_2010 BY near_POU5F1B_rs10505477_T_C /STATUS=OS_status_2010(1) /PRINT MEAN /PLOT SURVIVAL /TEST LOGRANK /COMPARE OVERALL POOLED.
		Resources	Processor Time	00:00:00.14
			Elapsed Time	00:00:00.13
		[DataSet2] H:\validation study\103SNPs-codoprognostic-SPSS-Feb 12, 2014.sav
		Case Processing Summary
		near_POU5F1B_rs10505477_T_C	Total N	N of Events	Censored
					N	Percent
		TT	145	51	94	0.648276
		TC	247	88	159	0.643725
		CC	112	31	81	0.723214
		Overall	504	170	334	0.662698
		Means and Medians for Survival Time
		near_POU5F1B_rs10505477_T_C	Meana				Median
			Estimate	Std. Error	95% Confidence Interval		Estimate	Std. Error	95% Confidence Interval
					Lower Bound	Upper Bound			Lower Bound	Upper Bound
		TT	7.94826	0.262435	7.43389	8.46264	10.0658	1.50677	7.11248	13.019
		TC	8.04595	0.238978	7.57756	8.51435	9.39178	0.341891	8.72167	10.0619
		CC	8.43808	0.289635	7.8704	9.00577
		Overall	8.23213	0.163384	7.9119	8.55236	9.48493	0.26246	8.97051	9.99935
		a. Estimation is limited to the largest survival time if it is censored.
		Overall Comparisons
			Chi-Square	df	Sig.
		Log Rank (Mantel-Cox)	3.26262	2	0.195673
		Test of equality of survival distributions for the different levels of near_POU5F1B_rs10505477_T_C.
recessive	near_POU5F1B_rs10505477_T_C
		KM OS_time_2010 BY near_MYC_rs6983267_G_T
		/STATUS=OS_status_2010(1)
		/PRINT MEAN
		/PLOT SURVIVAL
		/TEST LOGRANK
		/COMPARE OVERALL POOLED.
		Kaplan-Meier
		Notes
		Output Created		12-FEB-2014 17:01:59
		Comments
		Input	Data	H:\validation study\103SNPs-codoprognostic-SPSS-Feb 12, 2014.sav
			Active Dataset	DataSet2
			Filter	<none>
			Weight	<none>
			Split File	<none>
			N of Rows in Working Data File	505
		Missing Value Handling	Definition of Missing	User-defined missing values are treated as missing.
			Cases Used	Statistics are based on all cases with valid data for all variables in the analysis.
		Syntax		KM OS_time_2010 BY near_MYC_rs6983267_G_T /STATUS=OS_status_2010(1) /PRINT MEAN /PLOT SURVIVAL /TEST LOGRANK /COMPARE OVERALL POOLED.
		Resources	Processor Time	00:00:00.13
			Elapsed Time	00:00:00.13
		[DataSet2] H:\validation study\103SNPs-codoprognostic-SPSS-Feb 12, 2014.sav
		Case Processing Summary
		near_MYC_rs6983267_G_T	Total N	N of Events	Censored
					N	Percent
		GG	150	54	96	0.64
		GT	247	85	162	0.65587
		TT	107	31	76	0.71028
		Overall	504	170	334	0.662698
		Means and Medians for Survival Time
		near_MYC_rs6983267_G_T	Meana				Median
			Estimate	Std. Error	95% Confidence Interval		Estimate	Std. Error	95% Confidence Interval
					Lower Bound	Upper Bound			Lower Bound	Upper Bound
		GG	7.90983	0.261288	7.39771	8.42196	10.0658	1.50831	7.10946	13.022
		GT	8.15787	0.235927	7.69545	8.62028	9.39178	0.355597	8.69481	10.0888
		TT	8.32258	0.30108	7.73246	8.9127	9.48493	0.108448	9.27237	9.69749
		Overall	8.23213	0.163384	7.9119	8.55236	9.48493	0.26246	8.97051	9.99935
		a. Estimation is limited to the largest survival time if it is censored.
		Overall Comparisons
			Chi-Square	df	Sig.
		Log Rank (Mantel-Cox)	1.93616	2	0.379811
		Test of equality of survival distributions for the different levels of near_MYC_rs6983267_G_T.
recessive	near_MYC_rs6983267_G_T
		KM OS_time_2010 BY GWAS_associated_susceptibility_allele_rs7014346_G_A
		/STATUS=OS_status_2010(1)
		/PRINT MEAN
		/PLOT SURVIVAL
		/TEST LOGRANK
		/COMPARE OVERALL POOLED.
		Kaplan-Meier
		Notes
		Output Created		12-FEB-2014 17:02:07
		Comments
		Input	Data	H:\validation study\103SNPs-codoprognostic-SPSS-Feb 12, 2014.sav
			Active Dataset	DataSet2
			Filter	<none>
			Weight	<none>
			Split File	<none>
			N of Rows in Working Data File	505
		Missing Value Handling	Definition of Missing	User-defined missing values are treated as missing.
			Cases Used	Statistics are based on all cases with valid data for all variables in the analysis.
		Syntax		KM OS_time_2010 BY GWAS_associated_susceptibility_allele_rs7014346_G_A /STATUS=OS_status_2010(1) /PRINT MEAN /PLOT SURVIVAL /TEST LOGRANK /COMPARE OVERALL POOLED.
		Resources	Processor Time	00:00:00.14
			Elapsed Time	00:00:00.14
		[DataSet2] H:\validation study\103SNPs-codoprognostic-SPSS-Feb 12, 2014.sav
		Case Processing Summary
		GWAS-associated_susceptibility_allele_rs7014346_G_A	Total N	N of Events	Censored
					N	Percent
		GG	179	53	126	0.703911
		GA	242	87	155	0.640496
		AA	83	30	53	0.638554
		Overall	504	170	334	0.662698
		Means and Medians for Survival Time
		GWAS-associated_susceptibility_allele_rs7014346_G_A	Meana				Median
			Estimate	Std. Error	95% Confidence Interval		Estimate	Std. Error	95% Confidence Interval
					Lower Bound	Upper Bound			Lower Bound	Upper Bound
		GG	8.56785	0.264539	8.04936	9.08635	9.48493
		GA	7.93591	0.228465	7.48812	8.3837	9.38082	0.349024	8.69674	10.0649
		AA	7.79826	0.361366	7.08998	8.50654	10.0658	1.70691	6.72021	13.4113
		Overall	8.23213	0.163384	7.9119	8.55236	9.48493	0.26246	8.97051	9.99935
		a. Estimation is limited to the largest survival time if it is censored.
		Overall Comparisons
			Chi-Square	df	Sig.
		Log Rank (Mantel-Cox)	2.75968	2	0.251619
		Test of equality of survival distributions for the different levels of GWAS-associated_susceptibility_allele_rs7014346_G_A.
dominant	GWAS-associated_susceptibility_allele_rs7014346_G_A
		KM OS_time_2010 BY TLR4_rs1554973_T_C
		/STATUS=OS_status_2010(1)
		/PRINT MEAN
		/PLOT SURVIVAL
		/TEST LOGRANK
		/COMPARE OVERALL POOLED.
		Kaplan-Meier
		Notes
		Output Created		12-FEB-2014 17:02:15
		Comments
		Input	Data	H:\validation study\103SNPs-codoprognostic-SPSS-Feb 12, 2014.sav
			Active Dataset	DataSet2
			Filter	<none>
			Weight	<none>
			Split File	<none>
			N of Rows in Working Data File	505
		Missing Value Handling	Definition of Missing	User-defined missing values are treated as missing.
			Cases Used	Statistics are based on all cases with valid data for all variables in the analysis.
		Syntax		KM OS_time_2010 BY TLR4_rs1554973_T_C /STATUS=OS_status_2010(1) /PRINT MEAN /PLOT SURVIVAL /TEST LOGRANK /COMPARE OVERALL POOLED.
		Resources	Processor Time	00:00:00.14
			Elapsed Time	00:00:00.13
		[DataSet2] H:\validation study\103SNPs-codoprognostic-SPSS-Feb 12, 2014.sav
		Case Processing Summary
		TLR4_rs1554973_T_C	Total N	N of Events	Censored
					N	Percent
		TT	280	97	183	0.653571
		TC	194	64	130	0.670103
		CC	30	9	21	0.7
		Overall	504	170	334	0.662698
		Means and Medians for Survival Time
		TLR4_rs1554973_T_C	Meana				Median
			Estimate	Std. Error	95% Confidence Interval		Estimate	Std. Error	95% Confidence Interval
					Lower Bound	Upper Bound			Lower Bound	Upper Bound
		TT	7.94052	0.197041	7.55432	8.32672	9.33699
		TC	8.33477	0.255726	7.83355	8.83599	9.66027	0.301482	9.06937	10.2512
		CC	7.47559	0.457053	6.57977	8.37141
		Overall	8.23213	0.163384	7.9119	8.55236	9.48493	0.26246	8.97051	9.99935
		a. Estimation is limited to the largest survival time if it is censored.
		Overall Comparisons
			Chi-Square	df	Sig.
		Log Rank (Mantel-Cox)	0.249487	2	0.882723
		Test of equality of survival distributions for the different levels of TLR4_rs1554973_T_C.
none	TLR4_rs1554973_T_C
		KM OS_time_2010 BY PTGS1_rs1213266_G_A
		/STATUS=OS_status_2010(1)
		/PRINT MEAN
		/PLOT SURVIVAL
		/TEST LOGRANK
		/COMPARE OVERALL POOLED.
		Kaplan-Meier
		Notes
		Output Created		12-FEB-2014 17:02:24
		Comments
		Input	Data	H:\validation study\103SNPs-codoprognostic-SPSS-Feb 12, 2014.sav
			Active Dataset	DataSet2
			Filter	<none>
			Weight	<none>
			Split File	<none>
			N of Rows in Working Data File	505
		Missing Value Handling	Definition of Missing	User-defined missing values are treated as missing.
			Cases Used	Statistics are based on all cases with valid data for all variables in the analysis.
		Syntax		KM OS_time_2010 BY PTGS1_rs1213266_G_A /STATUS=OS_status_2010(1) /PRINT MEAN /PLOT SURVIVAL /TEST LOGRANK /COMPARE OVERALL POOLED.
		Resources	Processor Time	00:00:00.13
			Elapsed Time	00:00:00.13
		[DataSet2] H:\validation study\103SNPs-codoprognostic-SPSS-Feb 12, 2014.sav
		Warnings
		No statistics are computed because all cases are censored.
		Case Processing Summary
		PTGS1_rs1213266_G_A	Total N	N of Events	Censored
					N	Percent
[truncated: 2,353 more rows]

## Sheet: Additional File-5
best genetic model-final)	Gene_SNP
		Kaplan-Meier
		Notes
		Output Created		12-FEB-2014 17:16:50
		Comments
		Input	Data	H:\validation study\103SNPs-codoprognostic-SPSS-Feb 12, 2014.sav
			Active Dataset	DataSet2
			Filter	<none>
			Weight	<none>
			Split File	<none>
			N of Rows in Working Data File	505
		Missing Value Handling	Definition of Missing	User-defined missing values are treated as missing.
			Cases Used	Statistics are based on all cases with valid data for all variables in the analysis.
		Syntax		KM DFS_time BY SEPN1_rs718391_C_G /STATUS=DFS_status(1) /PRINT MEAN /PLOT SURVIVAL /TEST LOGRANK /COMPARE OVERALL POOLED.
		Resources	Processor Time	00:00:00.14
			Elapsed Time	00:00:00.14
		[DataSet2] H:\validation study\103SNPs-codoprognostic-SPSS-Feb 12, 2014.sav
		Case Processing Summary
		SEPN1_rs718391_C_G	Total N	N of Events	Censored
					N	Percent
		CC	173	61	112	0.647399
		CG	242	102	140	0.578512
		GG	88	36	52	0.590909
		Overall	503	199	304	0.604374
		Means and Medians for Survival Time
		SEPN1_rs718391_C_G	Meana				Median
			Estimate	Std. Error	95% Confidence Interval		Estimate	Std. Error	95% Confidence Interval
					Lower Bound	Upper Bound			Lower Bound	Upper Bound
		CC	7.6413	0.285892	7.08096	8.20165
		CG	7.11086	0.246861	6.62701	7.59471	8.85753	0.469758	7.93681	9.77826
		GG	7.62733	0.41676	6.81048	8.44418	10.0658	1.74578	6.64402	13.4875
		Overall	7.56957	0.185712	7.20557	7.93357	9.39178	0.504066	8.40381	10.3798
		a. Estimation is limited to the largest survival time if it is censored.
		Overall Comparisons
			Chi-Square	df	Sig.
		Log Rank (Mantel-Cox)	1.56221	2	0.4579
		Test of equality of survival distributions for the different levels of SEPN1_rs718391_C_G.
dominant	SEPN1_rs718391_C_G
		KM DFS_time BY HS2ST1_rs9433110_G_A
		/STATUS=DFS_status(1)
		/PRINT MEAN
		/PLOT SURVIVAL
		/TEST LOGRANK
		/COMPARE OVERALL POOLED.
		Kaplan-Meier
		Notes
		Output Created		12-FEB-2014 17:16:59
		Comments
		Input	Data	H:\validation study\103SNPs-codoprognostic-SPSS-Feb 12, 2014.sav
			Active Dataset	DataSet2
			Filter	<none>
			Weight	<none>
			Split File	<none>
			N of Rows in Working Data File	505
		Missing Value Handling	Definition of Missing	User-defined missing values are treated as missing.
			Cases Used	Statistics are based on all cases with valid data for all variables in the analysis.
		Syntax		KM DFS_time BY HS2ST1_rs9433110_G_A /STATUS=DFS_status(1) /PRINT MEAN /PLOT SURVIVAL /TEST LOGRANK /COMPARE OVERALL POOLED.
		Resources	Processor Time	00:00:00.14
			Elapsed Time	00:00:00.14
		[DataSet2] H:\validation study\103SNPs-codoprognostic-SPSS-Feb 12, 2014.sav
		Case Processing Summary
		HS2ST1_rs9433110_G_A	Total N	N of Events	Censored
					N	Percent
		GG	446	176	270	0.605381
		GA	56	22	34	0.607143
		AA	1	1	0	0
		Overall	503	199	304	0.604374
		Means and Medians for Survival Time
		HS2ST1_rs9433110_G_A	Meana				Median
			Estimate	Std. Error	95% Confidence Interval		Estimate	Std. Error	95% Confidence Interval
					Lower Bound	Upper Bound			Lower Bound	Upper Bound
		GG	7.57712	0.198556	7.18795	7.96629	9.39178
		GA	7.60834	0.478293	6.67088	8.54579	10.0658	1.45777	7.20853	12.923
		AA	0.780822	0	0.780822	0.780822	0.780822
		Overall	7.56957	0.185712	7.20557	7.93357	9.39178	0.504066	8.40381	10.3798
		a. Estimation is limited to the largest survival time if it is censored.
		Overall Comparisons
			Chi-Square	df	Sig.
		Log Rank (Mantel-Cox)	53.775	2	2.10328e-12
		Test of equality of survival distributions for the different levels of HS2ST1_rs9433110_G_A.
dominant	HS2ST1_rs9433110_G_A
		KM DFS_time BY DDX20_rs197412_T_C
		/STATUS=DFS_status(1)
		/PRINT MEAN
		/PLOT SURVIVAL
		/TEST LOGRANK
		/COMPARE OVERALL POOLED.
		Kaplan-Meier
		Notes
		Output Created		12-FEB-2014 17:17:07
		Comments
		Input	Data	H:\validation study\103SNPs-codoprognostic-SPSS-Feb 12, 2014.sav
			Active Dataset	DataSet2
			Filter	<none>
			Weight	<none>
			Split File	<none>
			N of Rows in Working Data File	505
		Missing Value Handling	Definition of Missing	User-defined missing values are treated as missing.
			Cases Used	Statistics are based on all cases with valid data for all variables in the analysis.
		Syntax		KM DFS_time BY DDX20_rs197412_T_C /STATUS=DFS_status(1) /PRINT MEAN /PLOT SURVIVAL /TEST LOGRANK /COMPARE OVERALL POOLED.
		Resources	Processor Time	00:00:00.14
			Elapsed Time	00:00:00.14
		[DataSet2] H:\validation study\103SNPs-codoprognostic-SPSS-Feb 12, 2014.sav
		Case Processing Summary
		DDX20 _rs197412_T_C	Total N	N of Events	Censored
					N	Percent
		TT	188	87	101	0.537234
		TC	251	95	156	0.621514
		CC	64	17	47	0.734375
		Overall	503	199	304	0.604374
		Means and Medians for Survival Time
		DDX20 _rs197412_T_C	Meana				Median
			Estimate	Std. Error	95% Confidence Interval		Estimate	Std. Error	95% Confidence Interval
					Lower Bound	Upper Bound			Lower Bound	Upper Bound
		TT	6.88119	0.315192	6.26341	7.49896	8.34247	0.920523	6.53824	10.1467
		TC	7.55205	0.228483	7.10423	7.99988	10.0658	0.528072	9.03073	11.1008
		CC	8.50712	0.45247	7.62028	9.39396
		Overall	7.56957	0.185712	7.20557	7.93357	9.39178	0.504066	8.40381	10.3798
		a. Estimation is limited to the largest survival time if it is censored.
		Overall Comparisons
			Chi-Square	df	Sig.
		Log Rank (Mantel-Cox)	9.19348	2	0.0100846
		Test of equality of survival distributions for the different levels of DDX20 _rs197412_T_C.
recessive, codominant, additive	DDX20 _rs197412_T_C
		KM DFS_time BY CRP_rs1205_C_T
		/STATUS=DFS_status(1)
		/PRINT MEAN
		/PLOT SURVIVAL
		/TEST LOGRANK
		/COMPARE OVERALL POOLED.
		Kaplan-Meier
		Notes
		Output Created		12-FEB-2014 17:17:18
		Comments
		Input	Data	H:\validation study\103SNPs-codoprognostic-SPSS-Feb 12, 2014.sav
			Active Dataset	DataSet2
			Filter	<none>
			Weight	<none>
			Split File	<none>
			N of Rows in Working Data File	505
		Missing Value Handling	Definition of Missing	User-defined missing values are treated as missing.
			Cases Used	Statistics are based on all cases with valid data for all variables in the analysis.
		Syntax		KM DFS_time BY CRP_rs1205_C_T /STATUS=DFS_status(1) /PRINT MEAN /PLOT SURVIVAL /TEST LOGRANK /COMPARE OVERALL POOLED.
		Resources	Processor Time	00:00:00.14
			Elapsed Time	00:00:00.14
		[DataSet2] H:\validation study\103SNPs-codoprognostic-SPSS-Feb 12, 2014.sav
		Case Processing Summary
		CRP_rs1205_C_T	Total N	N of Events	Censored
					N	Percent
		CC	202	86	116	0.574257
		CT	236	84	152	0.644068
		TT	65	29	36	0.553846
		Overall	503	199	304	0.604374
		Means and Medians for Survival Time
		CRP_rs1205_C_T	Meana				Median
			Estimate	Std. Error	95% Confidence Interval		Estimate	Std. Error	95% Confidence Interval
					Lower Bound	Upper Bound			Lower Bound	Upper Bound
		CC	7.24506	0.28468	6.68709	7.80303	9.33699
		CT	7.57964	0.244818	7.09979	8.05948	9.39178	0.585029	8.24512	10.5384
		TT	7.31471	0.504226	6.32643	8.30299	8.34521	1.55896	5.28965	11.4008
		Overall	7.56957	0.185712	7.20557	7.93357	9.39178	0.504066	8.40381	10.3798
		a. Estimation is limited to the largest survival time if it is censored.
		Overall Comparisons
			Chi-Square	df	Sig.
		Log Rank (Mantel-Cox)	2.88482	2	0.236358
		Test of equality of survival distributions for the different levels of CRP_rs1205_C_T.
codominant	CRP_rs1205_C_T
		KM DFS_time BY SELE_rs5361_A_C
		/STATUS=DFS_status(1)
		/PRINT MEAN
		/PLOT SURVIVAL
		/TEST LOGRANK
		/COMPARE OVERALL POOLED.
		Kaplan-Meier
		Notes
		Output Created		12-FEB-2014 17:17:25
		Comments
		Input	Data	H:\validation study\103SNPs-codoprognostic-SPSS-Feb 12, 2014.sav
			Active Dataset	DataSet2
			Filter	<none>
			Weight	<none>
			Split File	<none>
			N of Rows in Working Data File	505
		Missing Value Handling	Definition of Missing	User-defined missing values are treated as missing.
			Cases Used	Statistics are based on all cases with valid data for all variables in the analysis.
		Syntax		KM DFS_time BY SELE_rs5361_A_C /STATUS=DFS_status(1) /PRINT MEAN /PLOT SURVIVAL /TEST LOGRANK /COMPARE OVERALL POOLED.
		Resources	Processor Time	00:00:00.14
			Elapsed Time	00:00:00.14
		[DataSet2] H:\validation study\103SNPs-codoprognostic-SPSS-Feb 12, 2014.sav
		Case Processing Summary
		SELE _rs5361_A_C	Total N	N of Events	Censored
					N	Percent
		AA	427	168	259	0.606557
		AC	70	28	42	0.6
		CC	6	3	3	0.5
		Overall	503	199	304	0.604374
		Means and Medians for Survival Time
		SELE _rs5361_A_C	Meana				Median
			Estimate	Std. Error	95% Confidence Interval		Estimate	Std. Error	95% Confidence Interval
					Lower Bound	Upper Bound			Lower Bound	Upper Bound
		AA	7.5626	0.202041	7.1666	7.9586	9.39178	0.552247	8.30938	10.4742
		AC	7.50473	0.427339	6.66714	8.34231
		CC	6.79726	1.38602	4.08066	9.51386	8.72603	0
		Overall	7.56957	0.185712	7.20557	7.93357	9.39178	0.504066	8.40381	10.3798
		a. Estimation is limited to the largest survival time if it is censored.
		Overall Comparisons
			Chi-Square	df	Sig.
		Log Rank (Mantel-Cox)	0.259066	2	0.878505
		Test of equality of survival distributions for the different levels of SELE _rs5361_A_C.
none	SELE _rs5361_A_C
		KM DFS_time BY PTGS2_rs5275_T_C
		/STATUS=DFS_status(1)
		/PRINT MEAN
		/PLOT SURVIVAL
		/TEST LOGRANK
		/COMPARE OVERALL POOLED.
		Kaplan-Meier
		Notes
		Output Created		12-FEB-2014 17:17:32
		Comments
		Input	Data	H:\validation study\103SNPs-codoprognostic-SPSS-Feb 12, 2014.sav
			Active Dataset	DataSet2
			Filter	<none>
			Weight	<none>
			Split File	<none>
			N of Rows in Working Data File	505
		Missing Value Handling	Definition of Missing	User-defined missing values are treated as missing.
			Cases Used	Statistics are based on all cases with valid data for all variables in the analysis.
		Syntax		KM DFS_time BY PTGS2_rs5275_T_C /STATUS=DFS_status(1) /PRINT MEAN /PLOT SURVIVAL /TEST LOGRANK /COMPARE OVERALL POOLED.
		Resources	Processor Time	00:00:00.14
			Elapsed Time	00:00:00.14
		[DataSet2] H:\validation study\103SNPs-codoprognostic-SPSS-Feb 12, 2014.sav
		Case Processing Summary
		PTGS2_rs5275_T_C	Total N	N of Events	Censored
					N	Percent
		TT	229	80	149	0.650655
		TC	215	99	116	0.539535
		CC	59	20	39	0.661017
		Overall	503	199	304	0.604374
		Means and Medians for Survival Time
		PTGS2_rs5275_T_C	Meana				Median
			Estimate	Std. Error	95% Confidence Interval		Estimate	Std. Error	95% Confidence Interval
					Lower Bound	Upper Bound			Lower Bound	Upper Bound
		TT	8.03249	0.261572	7.51981	8.54517
		TC	6.83263	0.267271	6.30878	7.35648	8.70137
		CC	7.39388	0.480049	6.45298	8.33478	8.72603	1.48156	5.82216	11.6299
		Overall	7.56957	0.185712	7.20557	7.93357	9.39178	0.504066	8.40381	10.3798
		a. Estimation is limited to the largest survival time if it is censored.
		Overall Comparisons
			Chi-Square	df	Sig.
		Log Rank (Mantel-Cox)	7.60531	2	0.0223115
		Test of equality of survival distributions for the different levels of PTGS2_rs5275_T_C.
codominant	PTGS2_rs5275_T_C
		KM DFS_time BY MSH2_rs7607076_A_G
		/STATUS=DFS_status(1)
		/PRINT MEAN
		/PLOT SURVIVAL
		/TEST LOGRANK
		/COMPARE OVERALL POOLED.
		Kaplan-Meier
		Notes
		Output Created		12-FEB-2014 17:17:39
		Comments
		Input	Data	H:\validation study\103SNPs-codoprognostic-SPSS-Feb 12, 2014.sav
			Active Dataset	DataSet2
			Filter	<none>
			Weight	<none>
			Split File	<none>
			N of Rows in Working Data File	505
		Missing Value Handling	Definition of Missing	User-defined missing values are treated as missing.
			Cases Used	Statistics are based on all cases with valid data for all variables in the analysis.
		Syntax		KM DFS_time BY MSH2_rs7607076_A_G /STATUS=DFS_status(1) /PRINT MEAN /PLOT SURVIVAL /TEST LOGRANK /COMPARE OVERALL POOLED.
		Resources	Processor Time	00:00:00.14
			Elapsed Time	00:00:00.14
		[DataSet2] H:\validation study\103SNPs-codoprognostic-SPSS-Feb 12, 2014.sav
		Case Processing Summary
		MSH2_rs7607076_A_G	Total N	N of Events	Censored
					N	Percent
		AA	248	98	150	0.604839
		AG	205	80	125	0.609756
		GG	50	21	29	0.58
		Overall	503	199	304	0.604374
		Means and Medians for Survival Time
		MSH2_rs7607076_A_G	Meana				Median
			Estimate	Std. Error	95% Confidence Interval		Estimate	Std. Error	95% Confidence Interval
					Lower Bound	Upper Bound			Lower Bound	Upper Bound
		AA	7.49532	0.252228	7.00096	7.98969	9.39178
		AG	7.33618	0.261001	6.82462	7.84774	8.72603	0.450929	7.84221	9.60985
		GG	7.1879	0.618749	5.97515	8.40065	10.0658	2.64767	4.87631	15.2552
		Overall	7.56957	0.185712	7.20557	7.93357	9.39178	0.504066	8.40381	10.3798
		a. Estimation is limited to the largest survival time if it is censored.
		Overall Comparisons
			Chi-Square	df	Sig.
		Log Rank (Mantel-Cox)	0.205907	2	0.902169
		Test of equality of survival distributions for the different levels of MSH2_rs7607076_A_G.
recessive	MSH2_rs7607076_A_G
		KM DFS_time BY MSH6_rs3136245_C_T
		/STATUS=DFS_status(1)
		/PRINT MEAN
		/PLOT SURVIVAL
		/TEST LOGRANK
		/COMPARE OVERALL POOLED.
		Kaplan-Meier
		Notes
		Output Created		12-FEB-2014 17:17:48
		Comments
		Input	Data	H:\validation study\103SNPs-codoprognostic-SPSS-Feb 12, 2014.sav
			Active Dataset	DataSet2
			Filter	<none>
			Weight	<none>
			Split File	<none>
			N of Rows in Working Data File	505
		Missing Value Handling	Definition of Missing	User-defined missing values are treated as missing.
			Cases Used	Statistics are based on all cases with valid data for all variables in the analysis.
		Syntax		KM DFS_time BY MSH6_rs3136245_C_T /STATUS=DFS_status(1) /PRINT MEAN /PLOT SURVIVAL /TEST LOGRANK /COMPARE OVERALL POOLED.
		Resources	Processor Time	00:00:00.16
			Elapsed Time	00:00:00.15
		[DataSet2] H:\validation study\103SNPs-codoprognostic-SPSS-Feb 12, 2014.sav
		Case Processing Summary
		MSH6_rs3136245_C_T	Total N	N of Events	Censored
					N	Percent
		CC	338	130	208	0.615385
		CT	147	64	83	0.564626
		TT	17	5	12	0.705882
		Overall	502	199	303	0.603586
		Means and Medians for Survival Time
		MSH6_rs3136245_C_T	Meana				Median
			Estimate	Std. Error	95% Confidence Interval		Estimate	Std. Error	95% Confidence Interval
					Lower Bound	Upper Bound			Lower Bound	Upper Bound
		CC	7.67655	0.224923	7.2357	8.1174	10.0658
		CT	6.92094	0.302011	6.329	7.51288	8.72603	0.80185	7.1544	10.2977
		TT	8.04335	0.896807	6.28561	9.80109
		Overall	7.56335	0.185896	7.19899	7.9277	9.39178	0.504445	8.40307	10.3805
		a. Estimation is limited to the largest survival time if it is censored.
		Overall Comparisons
			Chi-Square	df	Sig.
		Log Rank (Mantel-Cox)	1.6371	2	0.441071
		Test of equality of survival distributions for the different levels of MSH6_rs3136245_C_T.
recessive	MSH6_rs3136245_C_T
		KM DFS_time BY SFXN5_rs17008608_A_G
		/STATUS=DFS_status(1)
		/PRINT MEAN
		/PLOT SURVIVAL
		/TEST LOGRANK
		/COMPARE OVERALL POOLED.
		Kaplan-Meier
		Notes
		Output Created		12-FEB-2014 17:17:56
		Comments
		Input	Data	H:\validation study\103SNPs-codoprognostic-SPSS-Feb 12, 2014.sav
			Active Dataset	DataSet2
			Filter	<none>
			Weight	<none>
			Split File	<none>
			N of Rows in Working Data File	505
		Missing Value Handling	Definition of Missing	User-defined missing values are treated as missing.
			Cases Used	Statistics are based on all cases with valid data for all variables in the analysis.
		Syntax		KM DFS_time BY SFXN5_rs17008608_A_G /STATUS=DFS_status(1) /PRINT MEAN /PLOT SURVIVAL /TEST LOGRANK /COMPARE OVERALL POOLED.
		Resources	Processor Time	00:00:00.11
			Elapsed Time	00:00:00.13
		[DataSet2] H:\validation study\103SNPs-codoprognostic-SPSS-Feb 12, 2014.sav
		Case Processing Summary
		SFXN5_rs17008608_A_G	Total N	N of Events	Censored
					N	Percent
		AA	359	141	218	0.607242
		AG	136	54	82	0.602941
		GG	8	4	4	0.5
		Overall	503	199	304	0.604374
		Means and Medians for Survival Time
		SFXN5_rs17008608_A_G	Meana				Median
			Estimate	Std. Error	95% Confidence Interval		Estimate	Std. Error	95% Confidence Interval
					Lower Bound	Upper Bound			Lower Bound	Upper Bound
		AA	7.63052	0.217092	7.20502	8.05602	9.39178
		AG	7.35848	0.343349	6.68552	8.03145	9.33699	0.468305	8.41911	10.2549
		GG	5.26575	1.01275	3.28076	7.25075	3.59178
		Overall	7.56957	0.185712	7.20557	7.93357	9.39178	0.504066	8.40381	10.3798
		a. Estimation is limited to the largest survival time if it is censored.
		Overall Comparisons
			Chi-Square	df	Sig.
		Log Rank (Mantel-Cox)	0.660102	2	0.718887
		Test of equality of survival distributions for the different levels of SFXN5_rs17008608_A_G.
none	SFXN5_rs17008608_A_G
		KM DFS_time BY DUSP2_rs1724120_G_A
		/STATUS=DFS_status(1)
		/PRINT MEAN
		/PLOT SURVIVAL
		/TEST LOGRANK
		/COMPARE OVERALL POOLED.
		Kaplan-Meier
		Notes
		Output Created		12-FEB-2014 17:18:05
		Comments
		Input	Data	H:\validation study\103SNPs-codoprognostic-SPSS-Feb 12, 2014.sav
			Active Dataset	DataSet2
			Filter	<none>
			Weight	<none>
			Split File	<none>
			N of Rows in Working Data File	505
		Missing Value Handling	Definition of Missing	User-defined missing values are treated as missing.
			Cases Used	Statistics are based on all cases with valid data for all variables in the analysis.
		Syntax		KM DFS_time BY DUSP2_rs1724120_G_A /STATUS=DFS_status(1) /PRINT MEAN /PLOT SURVIVAL /TEST LOGRANK /COMPARE OVERALL POOLED.
		Resources	Processor Time	00:00:00.14
			Elapsed Time	00:00:00.14
		[DataSet2] H:\validation study\103SNPs-codoprognostic-SPSS-Feb 12, 2014.sav
		Case Processing Summary
		DUSP2 _rs1724120_G_A	Total N	N of Events	Censored
					N	Percent
		GG	171	61	110	0.643275
		GA	248	103	145	0.584677
		AA	84	35	49	0.583333
		Overall	503	199	304	0.604374
		Means and Medians for Survival Time
		DUSP2 _rs1724120_G_A	Meana				Median
			Estimate	Std. Error	95% Confidence Interval		Estimate	Std. Error	95% Confidence Interval
					Lower Bound	Upper Bound			Lower Bound	Upper Bound
		GG	7.63127	0.283132	7.07633	8.18621
		GA	7.325	0.255193	6.82482	7.82518	9.39178
		AA	7.34971	0.448091	6.47146	8.22797	10.0658	1.74908	6.63755	13.494
		Overall	7.56957	0.185712	7.20557	7.93357	9.39178	0.504066	8.40381	10.3798
		a. Estimation is limited to the largest survival time if it is censored.
		Overall Comparisons
			Chi-Square	df	Sig.
		Log Rank (Mantel-Cox)	1.62464	2	0.443827
		Test of equality of survival distributions for the different levels of DUSP2 _rs1724120_G_A.
dominant	DUSP2 _rs1724120_G_A
		KM DFS_time BY IL1A_rs10496444_T_C
		/STATUS=DFS_status(1)
		/PRINT MEAN
		/PLOT SURVIVAL
		/TEST LOGRANK
		/COMPARE OVERALL POOLED.
		Kaplan-Meier
		Notes
		Output Created		12-FEB-2014 17:18:13
		Comments
		Input	Data	H:\validation study\103SNPs-codoprognostic-SPSS-Feb 12, 2014.sav
			Active Dataset	DataSet2
			Filter	<none>
			Weight	<none>
			Split File	<none>
			N of Rows in Working Data File	505
		Missing Value Handling	Definition of Missing	User-defined missing values are treated as missing.
			Cases Used	Statistics are based on all cases with valid data for all variables in the analysis.
		Syntax		KM DFS_time BY IL1A_rs10496444_T_C /STATUS=DFS_status(1) /PRINT MEAN /PLOT SURVIVAL /TEST LOGRANK /COMPARE OVERALL POOLED.
		Resources	Processor Time	00:00:00.14
			Elapsed Time	00:00:00.14
		[DataSet2] H:\validation study\103SNPs-codoprognostic-SPSS-Feb 12, 2014.sav
		Case Processing Summary
		IL1A_rs10496444_T_C	Total N	N of Events	Censored
					N	Percent
		TT	236	94	142	0.601695
		TC	205	76	129	0.629268
		CC	62	29	33	0.532258
		Overall	503	199	304	0.604374
		Means and Medians for Survival Time
		IL1A_rs10496444_T_C	Meana				Median
			Estimate	Std. Error	95% Confidence Interval		Estimate	Std. Error	95% Confidence Interval
					Lower Bound	Upper Bound			Lower Bound	Upper Bound
		TT	7.55813	0.248928	7.07023	8.04603	9.33699	0.662516	8.03845	10.6355
		TC	7.71277	0.296399	7.13183	8.29371
		CC	6.59892	0.486011	5.64634	7.5515	8.72603	1.88113	5.03901	12.413
		Overall	7.56957	0.185712	7.20557	7.93357	9.39178	0.504066	8.40381	10.3798
		a. Estimation is limited to the largest survival time if it is censored.
		Overall Comparisons
			Chi-Square	df	Sig.
		Log Rank (Mantel-Cox)	2.27862	2	0.32004
		Test of equality of survival distributions for the different levels of IL1A_rs10496444_T_C.
recessive	IL1A_rs10496444_T_C
		KM DFS_time BY IL1B_rs1143627_T_C
		/STATUS=DFS_status(1)
		/PRINT MEAN
		/PLOT SURVIVAL
		/TEST LOGRANK
		/COMPARE OVERALL POOLED.
		Kaplan-Meier
		Notes
		Output Created		12-FEB-2014 17:18:20
		Comments
		Input	Data	H:\validation study\103SNPs-codoprognostic-SPSS-Feb 12, 2014.sav
			Active Dataset	DataSet2
			Filter	<none>
			Weight	<none>
			Split File	<none>
			N of Rows in Working Data File	505
		Missing Value Handling	Definition of Missing	User-defined missing values are treated as missing.
			Cases Used	Statistics are based on all cases with valid data for all variables in the analysis.
		Syntax		KM DFS_time BY IL1B_rs1143627_T_C /STATUS=DFS_status(1) /PRINT MEAN /PLOT SURVIVAL /TEST LOGRANK /COMPARE OVERALL POOLED.
		Resources	Processor Time	00:00:00.12
			Elapsed Time	00:00:00.12
		[DataSet2] H:\validation study\103SNPs-codoprognostic-SPSS-Feb 12, 2014.sav
		Case Processing Summary
		IL1B_rs1143627_T_C	Total N	N of Events	Censored
					N	Percent
		TT	227	88	139	0.612335
		TC	206	87	119	0.57767
		CC	70	24	46	0.657143
		Overall	503	199	304	0.604374
		Means and Medians for Survival Time
		IL1B_rs1143627_T_C	Meana				Median
			Estimate	Std. Error	95% Confidence Interval		Estimate	Std. Error	95% Confidence Interval
					Lower Bound	Upper Bound			Lower Bound	Upper Bound
		TT	7.65112	0.273951	7.11418	8.18806	10.0658
		TC	7.10106	0.265105	6.58145	7.62067	8.70137	0.477223	7.76601	9.63673
		CC	7.58791	0.430494	6.74414	8.43167
		Overall	7.56957	0.185712	7.20557	7.93357	9.39178	0.504066	8.40381	10.3798
		a. Estimation is limited to the largest survival time if it is censored.
		Overall Comparisons
			Chi-Square	df	Sig.
		Log Rank (Mantel-Cox)	1.0381	2	0.595086
		Test of equality of survival distributions for the different levels of IL1B_rs1143627_T_C.
recessive	IL1B_rs1143627_T_C
		KM DFS_time BY CXCR2_rs7426289_C_T
		/STATUS=DFS_status(1)
		/PRINT MEAN
		/PLOT SURVIVAL
		/TEST LOGRANK
		/COMPARE OVERALL POOLED.
		Kaplan-Meier
		Notes
		Output Created		12-FEB-2014 17:18:28
		Comments
		Input	Data	H:\validation study\103SNPs-codoprognostic-SPSS-Feb 12, 2014.sav
			Active Dataset	DataSet2
			Filter	<none>
			Weight	<none>
			Split File	<none>
			N of Rows in Working Data File	505
		Missing Value Handling	Definition of Missing	User-defined missing values are treated as missing.
			Cases Used	Statistics are based on all cases with valid data for all variables in the analysis.
		Syntax		KM DFS_time BY CXCR2_rs7426289_C_T /STATUS=DFS_status(1) /PRINT MEAN /PLOT SURVIVAL /TEST LOGRANK /COMPARE OVERALL POOLED.
		Resources	Processor Time	00:00:00.13
			Elapsed Time	00:00:00.13
		[DataSet2] H:\validation study\103SNPs-codoprognostic-SPSS-Feb 12, 2014.sav
		Case Processing Summary
		CXCR2_rs7426289_C_T	Total N	N of Events	Censored
					N	Percent
		CC	135	50	85	0.62963
		CT	237	101	136	0.57384
		TT	131	48	83	0.633588
		Overall	503	199	304	0.604374
		Means and Medians for Survival Time
		CXCR2_rs7426289_C_T	Meana				Median
			Estimate	Std. Error	95% Confidence Interval		Estimate	Std. Error	95% Confidence Interval
					Lower Bound	Upper Bound			Lower Bound	Upper Bound
		CC	7.67474	0.328894	7.03011	8.31938	8.85753	0.517316	7.8436	9.87147
		CT	7.39638	0.268978	6.86918	7.92357
		TT	7.56582	0.328275	6.9224	8.20924	10.0658	1.28708	7.54307	12.5884
		Overall	7.56957	0.185712	7.20557	7.93357	9.39178	0.504066	8.40381	10.3798
		a. Estimation is limited to the largest survival time if it is censored.
		Overall Comparisons
			Chi-Square	df	Sig.
		Log Rank (Mantel-Cox)	2.30121	2	0.316446
		Test of equality of survival distributions for the different levels of CXCR2_rs7426289_C_T.
codominant	CXCR2_rs7426289_C_T
		KM DFS_time BY RAF1_rs9809501_T_G
		/STATUS=DFS_status(1)
		/PRINT MEAN
		/PLOT SURVIVAL
		/TEST LOGRANK
		/COMPARE OVERALL POOLED.
		Kaplan-Meier
		Notes
		Output Created		12-FEB-2014 17:18:35
		Comments
		Input	Data	H:\validation study\103SNPs-codoprognostic-SPSS-Feb 12, 2014.sav
			Active Dataset	DataSet2
			Filter	<none>
			Weight	<none>
			Split File	<none>
			N of Rows in Working Data File	505
		Missing Value Handling	Definition of Missing	User-defined missing values are treated as missing.
			Cases Used	Statistics are based on all cases with valid data for all variables in the analysis.
		Syntax		KM DFS_time BY RAF1_rs9809501_T_G /STATUS=DFS_status(1) /PRINT MEAN /PLOT SURVIVAL /TEST LOGRANK /COMPARE OVERALL POOLED.
		Resources	Processor Time	00:00:00.17
			Elapsed Time	00:00:00.14
		[DataSet2] H:\validation study\103SNPs-codoprognostic-SPSS-Feb 12, 2014.sav
		Case Processing Summary
		RAF1 _rs9809501_T_G	Total N	N of Events	Censored
					N	Percent
		TT	405	157	248	0.612346
		TG	93	40	53	0.569892
		GG	5	2	3	0.6
		Overall	503	199	304	0.604374
		Means and Medians for Survival Time
		RAF1 _rs9809501_T_G	Meana				Median
			Estimate	Std. Error	95% Confidence Interval		Estimate	Std. Error	95% Confidence Interval
					Lower Bound	Upper Bound			Lower Bound	Upper Bound
		TT	7.29757	0.19369	6.91794	7.67721	9.39178	0.461093	8.48804	10.2955
		TG	7.62161	0.399169	6.83924	8.40398
		GG	8.68	0.718275	7.27218	10.0878	9.33699	2.85473	3.74172	14.9323
		Overall	7.56957	0.185712	7.20557	7.93357	9.39178	0.504066	8.40381	10.3798
		a. Estimation is limited to the largest survival time if it is censored.
		Overall Comparisons
			Chi-Square	df	Sig.
		Log Rank (Mantel-Cox)	0.222554	2	0.894691
		Test of equality of survival distributions for the different levels of RAF1 _rs9809501_T_G.
none	RAF1 _rs9809501_T_G
		KM DFS_time BY RAF1_rs7643321_A_G
		/STATUS=DFS_status(1)
		/PRINT MEAN
		/PLOT SURVIVAL
		/TEST LOGRANK
		/COMPARE OVERALL POOLED.
		Kaplan-Meier
		Notes
		Output Created		12-FEB-2014 17:18:43
		Comments
		Input	Data	H:\validation study\103SNPs-codoprognostic-SPSS-Feb 12, 2014.sav
			Active Dataset	DataSet2
			Filter	<none>
			Weight	<none>
			Split File	<none>
			N of Rows in Working Data File	505
		Missing Value Handling	Definition of Missing	User-defined missing values are treated as missing.
			Cases Used	Statistics are based on all cases with valid data for all variables in the analysis.
		Syntax		KM DFS_time BY RAF1_rs7643321_A_G /STATUS=DFS_status(1) /PRINT MEAN /PLOT SURVIVAL /TEST LOGRANK /COMPARE OVERALL POOLED.
		Resources	Processor Time	00:00:00.16
			Elapsed Time	00:00:00.15
		[DataSet2] H:\validation study\103SNPs-codoprognostic-SPSS-Feb 12, 2014.sav
		Case Processing Summary
		RAF1 _rs7643321_A_G	Total N	N of Events	Censored
					N	Percent
		AA	348	134	214	0.614943
		AG	143	61	82	0.573427
		GG	12	4	8	0.666667
		Overall	503	199	304	0.604374
		Means and Medians for Survival Time
		RAF1 _rs7643321_A_G	Meana				Median
			Estimate	Std. Error	95% Confidence Interval		Estimate	Std. Error	95% Confidence Interval
					Lower Bound	Upper Bound			Lower Bound	Upper Bound
		AA	7.2927	0.210669	6.87979	7.70561	8.85753	0.566263	7.74766	9.96741
		AG	7.58161	0.327614	6.93949	8.22373
		GG	8.09737	0.724176	6.67799	9.51676	9.33699	2.79646	3.85592	14.8181
		Overall	7.56957	0.185712	7.20557	7.93357	9.39178	0.504066	8.40381	10.3798
		a. Estimation is limited to the largest survival time if it is censored.
		Overall Comparisons
			Chi-Square	df	Sig.
		Log Rank (Mantel-Cox)	0.614965	2	0.735296
		Test of equality of survival distributions for the different levels of RAF1 _rs7643321_A_G.
recessive	RAF1 _rs7643321_A_G
		KM DFS_time BY RAF1_rs4684871_A_G
		/STATUS=DFS_status(1)
		/PRINT MEAN
		/PLOT SURVIVAL
		/TEST LOGRANK
		/COMPARE OVERALL POOLED.
		Kaplan-Meier
		Notes
		Output Created		12-FEB-2014 17:18:51
		Comments
		Input	Data	H:\validation study\103SNPs-codoprognostic-SPSS-Feb 12, 2014.sav
			Active Dataset	DataSet2
			Filter	<none>
			Weight	<none>
			Split File	<none>
			N of Rows in Working Data File	505
		Missing Value Handling	Definition of Missing	User-defined missing values are treated as missing.
			Cases Used	Statistics are based on all cases with valid data for all variables in the analysis.
		Syntax		KM DFS_time BY RAF1_rs4684871_A_G /STATUS=DFS_status(1) /PRINT MEAN /PLOT SURVIVAL /TEST LOGRANK /COMPARE OVERALL POOLED.
		Resources	Processor Time	00:00:00.13
			Elapsed Time	00:00:00.13
		[DataSet2] H:\validation study\103SNPs-codoprognostic-SPSS-Feb 12, 2014.sav
		Case Processing Summary
		RAF1 _rs4684871_A_G	Total N	N of Events	Censored
					N	Percent
		AA	163	66	97	0.595092
		AG	246	93	153	0.621951
		GG	91	37	54	0.593407
		Overall	500	196	304	0.608
		Means and Medians for Survival Time
		RAF1 _rs4684871_A_G	Meana				Median
			Estimate	Std. Error	95% Confidence Interval		Estimate	Std. Error	95% Confidence Interval
					Lower Bound	Upper Bound			Lower Bound	Upper Bound
		AA	7.17209	0.311591	6.56137	7.78281	10.0658	1.42109	7.28041	12.8511
		AG	7.74805	0.260157	7.23815	8.25796
		GG	7.54318	0.400615	6.75798	8.32839	9.39178
		Overall	7.59865	0.186004	7.23408	7.96321	9.39178	0.503612	8.4047	10.3789
		a. Estimation is limited to the largest survival time if it is censored.
		Overall Comparisons
			Chi-Square	df	Sig.
		Log Rank (Mantel-Cox)	0.477278	2	0.787699
		Test of equality of survival distributions for the different levels of RAF1 _rs4684871_A_G.
none	RAF1 _rs4684871_A_G
		KM DFS_time BY RAF1_rs6795441_A_G
		/STATUS=DFS_status(1)
		/PRINT MEAN
		/PLOT SURVIVAL
		/TEST LOGRANK
		/COMPARE OVERALL POOLED.
		Kaplan-Meier
		Notes
		Output Created		12-FEB-2014 17:18:58
		Comments
		Input	Data	H:\validation study\103SNPs-codoprognostic-SPSS-Feb 12, 2014.sav
			Active Dataset	DataSet2
			Filter	<none>
			Weight	<none>
			Split File	<none>
			N of Rows in Working Data File	505
		Missing Value Handling	Definition of Missing	User-defined missing values are treated as missing.
			Cases Used	Statistics are based on all cases with valid data for all variables in the analysis.
		Syntax		KM DFS_time BY RAF1_rs6795441_A_G /STATUS=DFS_status(1) /PRINT MEAN /PLOT SURVIVAL /TEST LOGRANK /COMPARE OVERALL POOLED.
		Resources	Processor Time	00:00:00.14
			Elapsed Time	00:00:00.13
		[DataSet2] H:\validation study\103SNPs-codoprognostic-SPSS-Feb 12, 2014.sav
		Case Processing Summary
		RAF1 _rs6795441_A_G	Total N	N of Events	Censored
					N	Percent
		AA	159	62	97	0.610063
		AG	240	93	147	0.6125
		GG	101	43	58	0.574257
		Overall	500	198	302	0.604
		Means and Medians for Survival Time
		RAF1 _rs6795441_A_G	Meana				Median
			Estimate	Std. Error	95% Confidence Interval		Estimate	Std. Error	95% Confidence Interval
					Lower Bound	Upper Bound			Lower Bound	Upper Bound
		AA	7.64346	0.301854	7.05182	8.23509	9.39178
		AG	7.62762	0.267731	7.10286	8.15237	8.72603
		GG	7.02997	0.397139	6.25158	7.80836	10.0658	2.57477	5.0192	15.1123
		Overall	7.54822	0.187937	7.17987	7.91658	9.39178	0.468495	8.47353	10.31
		a. Estimation is limited to the largest survival time if it is censored.
		Overall Comparisons
			Chi-Square	df	Sig.
		Log Rank (Mantel-Cox)	0.902861	2	0.636717
		Test of equality of survival distributions for the different levels of RAF1 _rs6795441_A_G.
recessive	RAF1 _rs6795441_A_G
		KM DFS_time BY mir26a1_rs7372209_C_T
		/STATUS=DFS_status(1)
		/PRINT MEAN
		/PLOT SURVIVAL
		/TEST LOGRANK
		/COMPARE OVERALL POOLED.
		Kaplan-Meier
		Notes
		Output Created		12-FEB-2014 17:19:07
		Comments
		Input	Data	H:\validation study\103SNPs-codoprognostic-SPSS-Feb 12, 2014.sav
			Active Dataset	DataSet2
			Filter	<none>
			Weight	<none>
			Split File	<none>
			N of Rows in Working Data File	505
		Missing Value Handling	Definition of Missing	User-defined missing values are treated as missing.
			Cases Used	Statistics are based on all cases with valid data for all variables in the analysis.
		Syntax		KM DFS_time BY mir26a1_rs7372209_C_T /STATUS=DFS_status(1) /PRINT MEAN /PLOT SURVIVAL /TEST LOGRANK /COMPARE OVERALL POOLED.
		Resources	Processor Time	00:00:00.13
			Elapsed Time	00:00:00.12
		[DataSet2] H:\validation study\103SNPs-codoprognostic-SPSS-Feb 12, 2014.sav
		Case Processing Summary
		mir26a-1_rs7372209_C_T	Total N	N of Events	Censored
					N	Percent
		CC	261	106	155	0.59387
		CT	193	70	123	0.637306
		TT	49	23	26	0.530612
		Overall	503	199	304	0.604374
		Means and Medians for Survival Time
		mir26a-1_rs7372209_C_T	Meana				Median
			Estimate	Std. Error	95% Confidence Interval		Estimate	Std. Error	95% Confidence Interval
					Lower Bound	Upper Bound			Lower Bound	Upper Bound
		CC	7.30913	0.250287	6.81857	7.7997	9.33699	0.53262	8.29305	10.3809
		CT	8.00907	0.283159	7.45408	8.56406
		TT	5.88464	0.452916	4.99692	6.77236
		Overall	7.56957	0.185712	7.20557	7.93357	9.39178	0.504066	8.40381	10.3798
		a. Estimation is limited to the largest survival time if it is censored.
		Overall Comparisons
			Chi-Square	df	Sig.
		Log Rank (Mantel-Cox)	3.7061	2	0.156758
		Test of equality of survival distributions for the different levels of mir26a-1_rs7372209_C_T.
recessive	mir26a-1_rs7372209_C_T
		KM DFS_time BY ALCAM_rs1157_C_T
		/STATUS=DFS_status(1)
		/PRINT MEAN
		/PLOT SURVIVAL
		/TEST LOGRANK
		/COMPARE OVERALL POOLED.
		Kaplan-Meier
		Notes
		Output Created		12-FEB-2014 17:19:15
		Comments
		Input	Data	H:\validation study\103SNPs-codoprognostic-SPSS-Feb 12, 2014.sav
			Active Dataset	DataSet2
			Filter	<none>
			Weight	<none>
			Split File	<none>
			N of Rows in Working Data File	505
		Missing Value Handling	Definition of Missing	User-defined missing values are treated as missing.
			Cases Used	Statistics are based on all cases with valid data for all variables in the analysis.
		Syntax		KM DFS_time BY ALCAM_rs1157_C_T /STATUS=DFS_status(1) /PRINT MEAN /PLOT SURVIVAL /TEST LOGRANK /COMPARE OVERALL POOLED.
		Resources	Processor Time	00:00:00.13
			Elapsed Time	00:00:00.14
		[DataSet2] H:\validation study\103SNPs-codoprognostic-SPSS-Feb 12, 2014.sav
		Case Processing Summary
		ALCAM_rs1157_C_T	Total N	N of Events	Censored
					N	Percent
		CC	322	134	188	0.583851
		CT	161	58	103	0.639752
		TT	20	7	13	0.65
		Overall	503	199	304	0.604374
		Means and Medians for Survival Time
		ALCAM_rs1157_C_T	Meana				Median
			Estimate	Std. Error	95% Confidence Interval		Estimate	Std. Error	95% Confidence Interval
					Lower Bound	Upper Bound			Lower Bound	Upper Bound
		CC	7.41436	0.231398	6.96082	7.8679	9.33699	0.493482	8.36976	10.3042
		CT	7.57118	0.297897	6.9873	8.15506
		TT	6.57765	0.673127	5.25833	7.89698
		Overall	7.56957	0.185712	7.20557	7.93357	9.39178	0.504066	8.40381	10.3798
		a. Estimation is limited to the largest survival time if it is censored.
		Overall Comparisons
			Chi-Square	df	Sig.
		Log Rank (Mantel-Cox)	1.2571	2	0.533364
		Test of equality of survival distributions for the different levels of ALCAM_rs1157_C_T.
dominant	ALCAM_rs1157_C_T
		KM DFS_time BY CD47_rs12695175_A_C
		/STATUS=DFS_status(1)
		/PRINT MEAN
		/PLOT SURVIVAL
		/TEST LOGRANK
		/COMPARE OVERALL POOLED.
		Kaplan-Meier
		Notes
		Output Created		12-FEB-2014 17:19:23
		Comments
		Input	Data	H:\validation study\103SNPs-codoprognostic-SPSS-Feb 12, 2014.sav
			Active Dataset	DataSet2
			Filter	<none>
			Weight	<none>
			Split File	<none>
			N of Rows in Working Data File	505
		Missing Value Handling	Definition of Missing	User-defined missing values are treated as missing.
			Cases Used	Statistics are based on all cases with valid data for all variables in the analysis.
		Syntax		KM DFS_time BY CD47_rs12695175_A_C /STATUS=DFS_status(1) /PRINT MEAN /PLOT SURVIVAL /TEST LOGRANK /COMPARE OVERALL POOLED.
		Resources	Processor Time	00:00:00.13
			Elapsed Time	00:00:00.13
		[DataSet2] H:\validation study\103SNPs-codoprognostic-SPSS-Feb 12, 2014.sav
		Case Processing Summary
		CD47_rs12695175_A_C	Total N	N of Events	Censored
					N	Percent
		AA	341	131	210	0.615836
		AC	149	63	86	0.577181
		CC	13	5	8	0.615385
		Overall	503	199	304	0.604374
		Means and Medians for Survival Time
		CD47_rs12695175_A_C	Meana				Median
			Estimate	Std. Error	95% Confidence Interval		Estimate	Std. Error	95% Confidence Interval
					Lower Bound	Upper Bound			Lower Bound	Upper Bound
		AA	7.70089	0.220977	7.26778	8.13401	10.0658	0.874969	8.35081	11.7807
		AC	7.15832	0.340925	6.4901	7.82653	9.33699
		CC	6.22381	0.69216	4.86718	7.58045
		Overall	7.56957	0.185712	7.20557	7.93357	9.39178	0.504066	8.40381	10.3798
		a. Estimation is limited to the largest survival time if it is censored.
		Overall Comparisons
			Chi-Square	df	Sig.
		Log Rank (Mantel-Cox)	1.10879	2	0.574418
		Test of equality of survival distributions for the different levels of CD47_rs12695175_A_C.
dominant	CD47_rs12695175_A_C
		KM DFS_time BY TXNRD3_rs11718498_G_A
		/STATUS=DFS_status(1)
		/PRINT MEAN
		/PLOT SURVIVAL
		/TEST LOGRANK
		/COMPARE OVERALL POOLED.
		Kaplan-Meier
		Notes
		Output Created		12-FEB-2014 17:19:30
		Comments
		Input	Data	H:\validation study\103SNPs-codoprognostic-SPSS-Feb 12, 2014.sav
			Active Dataset	DataSet2
			Filter	<none>
			Weight	<none>
			Split File	<none>
			N of Rows in Working Data File	505
		Missing Value Handling	Definition of Missing	User-defined missing values are treated as missing.
			Cases Used	Statistics are based on all cases with valid data for all variables in the analysis.
		Syntax		KM DFS_time BY TXNRD3_rs11718498_G_A /STATUS=DFS_status(1) /PRINT MEAN /PLOT SURVIVAL /TEST LOGRANK /COMPARE OVERALL POOLED.
		Resources	Processor Time	00:00:00.13
			Elapsed Time	00:00:00.13
		[DataSet2] H:\validation study\103SNPs-codoprognostic-SPSS-Feb 12, 2014.sav
		Case Processing Summary
		TXNRD3_rs11718498_G_A	Total N	N of Events	Censored
					N	Percent
		GG	155	61	94	0.606452
		GA	252	105	147	0.583333
		AA	96	33	63	0.65625
		Overall	503	199	304	0.604374
		Means and Medians for Survival Time
		TXNRD3_rs11718498_G_A	Meana				Median
			Estimate	Std. Error	95% Confidence Interval		Estimate	Std. Error	95% Confidence Interval
					Lower Bound	Upper Bound			Lower Bound	Upper Bound
		GG	7.66198	0.310296	7.0538	8.27016	8.85753	0.367014	8.13819	9.57688
		GA	7.12006	0.242107	6.64553	7.59459
		AA	7.69479	0.379273	6.95141	8.43816
		Overall	7.56957	0.185712	7.20557	7.93357	9.39178	0.504066	8.40381	10.3798
		a. Estimation is limited to the largest survival time if it is censored.
		Overall Comparisons
			Chi-Square	df	Sig.
		Log Rank (Mantel-Cox)	1.67239	2	0.433357
		Test of equality of survival distributions for the different levels of TXNRD3_rs11718498_G_A.
dominant	TXNRD3_rs11718498_G_A
		KM DFS_time BY CLOCK_rs1047354_T_C
		/STATUS=DFS_status(1)
		/PRINT MEAN
		/PLOT SURVIVAL
		/TEST LOGRANK
		/COMPARE OVERALL POOLED.
		Kaplan-Meier
		Notes
		Output Created		12-FEB-2014 17:19:39
		Comments
		Input	Data	H:\validation study\103SNPs-codoprognostic-SPSS-Feb 12, 2014.sav
			Active Dataset	DataSet2
			Filter	<none>
			Weight	<none>
			Split File	<none>
			N of Rows in Working Data File	505
		Missing Value Handling	Definition of Missing	User-defined missing values are treated as missing.
			Cases Used	Statistics are based on all cases with valid data for all variables in the analysis.
		Syntax		KM DFS_time BY CLOCK_rs1047354_T_C /STATUS=DFS_status(1) /PRINT MEAN /PLOT SURVIVAL /TEST LOGRANK /COMPARE OVERALL POOLED.
		Resources	Processor Time	00:00:00.14
			Elapsed Time	00:00:00.14
		[DataSet2] H:\validation study\103SNPs-codoprognostic-SPSS-Feb 12, 2014.sav
		Case Processing Summary
		CLOCK_rs1047354_T_C	Total N	N of Events	Censored
					N	Percent
		TT	204	81	123	0.602941
		TC	234	93	141	0.602564
		CC	65	25	40	0.615385
		Overall	503	199	304	0.604374
		Means and Medians for Survival Time
		CLOCK_rs1047354_T_C	Meana				Median
			Estimate	Std. Error	95% Confidence Interval		Estimate	Std. Error	95% Confidence Interval
					Lower Bound	Upper Bound			Lower Bound	Upper Bound
		TT	7.636	0.284666	7.07806	8.19395
		TC	7.3125	0.245976	6.83039	7.79462	8.85753	0.461928	7.95215	9.76291
		CC	7.33017	0.460802	6.427	8.23335	10.0658	0
		Overall	7.56957	0.185712	7.20557	7.93357	9.39178	0.504066	8.40381	10.3798
		a. Estimation is limited to the largest survival time if it is censored.
		Overall Comparisons
			Chi-Square	df	Sig.
		Log Rank (Mantel-Cox)	0.0411084	2	0.979656
		Test of equality of survival distributions for the different levels of CLOCK_rs1047354_T_C.
none	CLOCK_rs1047354_T_C
		KM DFS_time BY CLOCK_rs1801260_T_C
		/STATUS=DFS_status(1)
		/PRINT MEAN
		/PLOT SURVIVAL
		/TEST LOGRANK
		/COMPARE OVERALL POOLED.
		Kaplan-Meier
		Notes
		Output Created		12-FEB-2014 17:19:46
		Comments
		Input	Data	H:\validation study\103SNPs-codoprognostic-SPSS-Feb 12, 2014.sav
			Active Dataset	DataSet2
			Filter	<none>
			Weight	<none>
			Split File	<none>
			N of Rows in Working Data File	505
		Missing Value Handling	Definition of Missing	User-defined missing values are treated as missing.
			Cases Used	Statistics are based on all cases with valid data for all variables in the analysis.
		Syntax		KM DFS_time BY CLOCK_rs1801260_T_C /STATUS=DFS_status(1) /PRINT MEAN /PLOT SURVIVAL /TEST LOGRANK /COMPARE OVERALL POOLED.
		Resources	Processor Time	00:00:00.14
			Elapsed Time	00:00:00.13
		[DataSet2] H:\validation study\103SNPs-codoprognostic-SPSS-Feb 12, 2014.sav
		Case Processing Summary
		CLOCK_rs1801260_T_C	Total N	N of Events	Censored
					N	Percent
		TT	278	109	169	0.607914
		TC	194	80	114	0.587629
		CC	30	10	20	0.666667
		Overall	502	199	303	0.603586
		Means and Medians for Survival Time
		CLOCK_rs1801260_T_C	Meana				Median
			Estimate	Std. Error	95% Confidence Interval		Estimate	Std. Error	95% Confidence Interval
					Lower Bound	Upper Bound			Lower Bound	Upper Bound
		TT	7.34661	0.226235	6.90319	7.79003	9.39178	0.543653	8.32622	10.4573
		TC	7.50011	0.2932	6.92543	8.07478	9.33699
		CC	6.5297	0.53618	5.47878	7.58061
		Overall	7.5624	0.185948	7.19794	7.92686	9.39178	0.505267	8.40146	10.3821
		a. Estimation is limited to the largest survival time if it is censored.
		Overall Comparisons
			Chi-Square	df	Sig.
		Log Rank (Mantel-Cox)	0.317309	2	0.853291
		Test of equality of survival distributions for the different levels of CLOCK_rs1801260_T_C.
recessive	CLOCK_rs1801260_T_C
		KM DFS_time BY EGF_rs4444903_A_G
		/STATUS=DFS_status(1)
		/PRINT MEAN
		/PLOT SURVIVAL
		/TEST LOGRANK
		/COMPARE OVERALL POOLED.
		Kaplan-Meier
		Notes
		Output Created		12-FEB-2014 17:19:53
		Comments
		Input	Data	H:\validation study\103SNPs-codoprognostic-SPSS-Feb 12, 2014.sav
			Active Dataset	DataSet2
			Filter	<none>
			Weight	<none>
			Split File	<none>
			N of Rows in Working Data File	505
		Missing Value Handling	Definition of Missing	User-defined missing values are treated as missing.
			Cases Used	Statistics are based on all cases with valid data for all variables in the analysis.
		Syntax		KM DFS_time BY EGF_rs4444903_A_G /STATUS=DFS_status(1) /PRINT MEAN /PLOT SURVIVAL /TEST LOGRANK /COMPARE OVERALL POOLED.
		Resources	Processor Time	00:00:00.14
			Elapsed Time	00:00:00.14
		[DataSet2] H:\validation study\103SNPs-codoprognostic-SPSS-Feb 12, 2014.sav
		Case Processing Summary
		EGF_rs4444903_A_G	Total N	N of Events	Censored
					N	Percent
		AA	178	69	109	0.61236
		AG	246	95	151	0.613821
		GG	78	35	43	0.551282
		Overall	502	199	303	0.603586
		Means and Medians for Survival Time
		EGF_rs4444903_A_G	Meana				Median
			Estimate	Std. Error	95% Confidence Interval		Estimate	Std. Error	95% Confidence Interval
					Lower Bound	Upper Bound			Lower Bound	Upper Bound
		AA	7.61703	0.311735	7.00603	8.22803	10.0658	1.26001	7.59613	12.5354
		AG	7.52314	0.254511	7.0243	8.02198	9.39178
		GG	6.8695	0.392755	6.0997	7.6393	8.72603
		Overall	7.55823	0.186274	7.19313	7.92332	9.39178	0.506054	8.39992	10.3836
		a. Estimation is limited to the largest survival time if it is censored.
		Overall Comparisons
			Chi-Square	df	Sig.
		Log Rank (Mantel-Cox)	0.803456	2	0.669163
		Test of equality of survival distributions for the different levels of EGF_rs4444903_A_G.
recessive	EGF_rs4444903_A_G
		KM DFS_time BY IRF2_rs3822118_C_T
		/STATUS=DFS_status(1)
		/PRINT MEAN
		/PLOT SURVIVAL
		/TEST LOGRANK
		/COMPARE OVERALL POOLED.
		Kaplan-Meier
		Notes
		Output Created		12-FEB-2014 17:20:01
		Comments
		Input	Data	H:\validation study\103SNPs-codoprognostic-SPSS-Feb 12, 2014.sav
			Active Dataset	DataSet2
			Filter	<none>
			Weight	<none>
			Split File	<none>
			N of Rows in Working Data File	505
		Missing Value Handling	Definition of Missing	User-defined missing values are treated as missing.
			Cases Used	Statistics are based on all cases with valid data for all variables in the analysis.
		Syntax		KM DFS_time BY IRF2_rs3822118_C_T /STATUS=DFS_status(1) /PRINT MEAN /PLOT SURVIVAL /TEST LOGRANK /COMPARE OVERALL POOLED.
		Resources	Processor Time	00:00:00.16
			Elapsed Time	00:00:00.15
		[DataSet2] H:\validation study\103SNPs-codoprognostic-SPSS-Feb 12, 2014.sav
		Case Processing Summary
		IRF2_rs3822118_C_T	Total N	N of Events	Censored
					N	Percent
		CC	226	87	139	0.615044
		CT	230	98	132	0.573913
		TT	47	14	33	0.702128
		Overall	503	199	304	0.604374
		Means and Medians for Survival Time
		IRF2_rs3822118_C_T	Meana				Median
			Estimate	Std. Error	95% Confidence Interval		Estimate	Std. Error	95% Confidence Interval
					Lower Bound	Upper Bound			Lower Bound	Upper Bound
		CC	7.6755	0.271558	7.14325	8.20775	9.39178
		CT	7.04163	0.258968	6.53406	7.54921	9.33699	1.10893	7.16348	11.5105
		TT	8.17562	0.480341	7.23415	9.11708
		Overall	7.56957	0.185712	7.20557	7.93357	9.39178	0.504066	8.40381	10.3798
		a. Estimation is limited to the largest survival time if it is censored.
		Overall Comparisons
			Chi-Square	df	Sig.
		Log Rank (Mantel-Cox)	3.34945	2	0.18736
		Test of equality of survival distributions for the different levels of IRF2_rs3822118_C_T.
recessive	IRF2_rs3822118_C_T
		KM DFS_time BY IRF2_rs3756094_G_A
		/STATUS=DFS_status(1)
		/PRINT MEAN
		/PLOT SURVIVAL
		/TEST LOGRANK
		/COMPARE OVERALL POOLED.
		Kaplan-Meier
		Notes
		Output Created		12-FEB-2014 17:20:09
		Comments
		Input	Data	H:\validation study\103SNPs-codoprognostic-SPSS-Feb 12, 2014.sav
			Active Dataset	DataSet2
			Filter	<none>
			Weight	<none>
			Split File	<none>
			N of Rows in Working Data File	505
		Missing Value Handling	Definition of Missing	User-defined missing values are treated as missing.
			Cases Used	Statistics are based on all cases with valid data for all variables in the analysis.
		Syntax		KM DFS_time BY IRF2_rs3756094_G_A /STATUS=DFS_status(1) /PRINT MEAN /PLOT SURVIVAL /TEST LOGRANK /COMPARE OVERALL POOLED.
		Resources	Processor Time	00:00:00.16
			Elapsed Time	00:00:00.15
		[DataSet2] H:\validation study\103SNPs-codoprognostic-SPSS-Feb 12, 2014.sav
		Case Processing Summary
		IRF2_rs3756094_G_A	Total N	N of Events	Censored
					N	Percent
		GG	252	98	154	0.611111
		GA	211	86	125	0.592417
		AA	40	15	25	0.625
		Overall	503	199	304	0.604374
		Means and Medians for Survival Time
		IRF2_rs3756094_G_A	Meana				Median
			Estimate	Std. Error	95% Confidence Interval		Estimate	Std. Error	95% Confidence Interval
					Lower Bound	Upper Bound			Lower Bound	Upper Bound
		GG	7.69226	0.256578	7.18936	8.19515
		GA	7.09459	0.258639	6.58766	7.60152	8.72603	0.652442	7.44724	10.0048
		AA	7.42575	0.563173	6.32193	8.52957
		Overall	7.56957	0.185712	7.20557	7.93357	9.39178	0.504066	8.40381	10.3798
		a. Estimation is limited to the largest survival time if it is censored.
		Overall Comparisons
			Chi-Square	df	Sig.
		Log Rank (Mantel-Cox)	0.397836	2	0.819617
		Test of equality of survival distributions for the different levels of IRF2_rs3756094_G_A.
none	IRF2_rs3756094_G_A
		KM DFS_time BY IRF2_rs12504466_T_C
		/STATUS=DFS_status(1)
		/PRINT MEAN
		/PLOT SURVIVAL
		/TEST LOGRANK
		/COMPARE OVERALL POOLED.
		Kaplan-Meier
		Notes
		Output Created		12-FEB-2014 17:20:17
		Comments
		Input	Data	H:\validation study\103SNPs-codoprognostic-SPSS-Feb 12, 2014.sav
			Active Dataset	DataSet2
			Filter	<none>
			Weight	<none>
			Split File	<none>
			N of Rows in Working Data File	505
		Missing Value Handling	Definition of Missing	User-defined missing values are treated as missing.
			Cases Used	Statistics are based on all cases with valid data for all variables in the analysis.
		Syntax		KM DFS_time BY IRF2_rs12504466_T_C /STATUS=DFS_status(1) /PRINT MEAN /PLOT SURVIVAL /TEST LOGRANK /COMPARE OVERALL POOLED.
		Resources	Processor Time	00:00:00.14
			Elapsed Time	00:00:00.14
		[DataSet2] H:\validation study\103SNPs-codoprognostic-SPSS-Feb 12, 2014.sav
		Case Processing Summary
		IRF2_rs12504466_T_C	Total N	N of Events	Censored
					N	Percent
		TT	135	48	87	0.644444
		TC	265	111	154	0.581132
		CC	103	40	63	0.61165
		Overall	503	199	304	0.604374
		Means and Medians for Survival Time
		IRF2_rs12504466_T_C	Meana				Median
			Estimate	Std. Error	95% Confidence Interval		Estimate	Std. Error	95% Confidence Interval
					Lower Bound	Upper Bound			Lower Bound	Upper Bound
		TT	7.91158	0.347235	7.231	8.59216
		TC	7.28332	0.248739	6.79579	7.77085	9.39178
		CC	7.48775	0.35974	6.78266	8.19284	8.72603	0.619808	7.5112	9.94085
		Overall	7.56957	0.185712	7.20557	7.93357	9.39178	0.504066	8.40381	10.3798
		a. Estimation is limited to the largest survival time if it is censored.
		Overall Comparisons
			Chi-Square	df	Sig.
		Log Rank (Mantel-Cox)	1.92371	2	0.382183
		Test of equality of survival distributions for the different levels of IRF2_rs12504466_T_C.
codominant	IRF2_rs12504466_T_C
		KM DFS_time BY IRF2_rs7685698_T_C
		/STATUS=DFS_status(1)
		/PRINT MEAN
		/PLOT SURVIVAL
		/TEST LOGRANK
		/COMPARE OVERALL POOLED.
		Kaplan-Meier
		Notes
		Output Created		12-FEB-2014 17:20:25
		Comments
		Input	Data	H:\validation study\103SNPs-codoprognostic-SPSS-Feb 12, 2014.sav
			Active Dataset	DataSet2
			Filter	<none>
			Weight	<none>
			Split File	<none>
			N of Rows in Working Data File	505
		Missing Value Handling	Definition of Missing	User-defined missing values are treated as missing.
			Cases Used	Statistics are based on all cases with valid data for all variables in the analysis.
		Syntax		KM DFS_time BY IRF2_rs7685698_T_C /STATUS=DFS_status(1) /PRINT MEAN /PLOT SURVIVAL /TEST LOGRANK /COMPARE OVERALL POOLED.
		Resources	Processor Time	00:00:00.13
			Elapsed Time	00:00:00.13
		[DataSet2] H:\validation study\103SNPs-codoprognostic-SPSS-Feb 12, 2014.sav
		Case Processing Summary
		IRF2_rs7685698_T_C	Total N	N of Events	Censored
					N	Percent
		TT	368	137	231	0.627717
		TC	130	60	70	0.538462
		CC	5	2	3	0.6
		Overall	503	199	304	0.604374
		Means and Medians for Survival Time
		IRF2_rs7685698_T_C	Meana				Median
			Estimate	Std. Error	95% Confidence Interval		Estimate	Std. Error	95% Confidence Interval
					Lower Bound	Upper Bound			Lower Bound	Upper Bound
		TT	7.72845	0.214531	7.30797	8.14893	9.39178	0.524568	8.36363	10.4199
		TC	6.92822	0.333538	6.27449	7.58196
		CC	5.18959	1.56317	2.12577	8.25341
		Overall	7.56957	0.185712	7.20557	7.93357	9.39178	0.504066	8.40381	10.3798
		a. Estimation is limited to the largest survival time if it is censored.
		Overall Comparisons
			Chi-Square	df	Sig.
		Log Rank (Mantel-Cox)	3.6119	2	0.164318
		Test of equality of survival distributions for the different levels of IRF2_rs7685698_T_C.
dominant	IRF2_rs7685698_T_C
		KM DFS_time BY IRF2_rs13116389_G_T
		/STATUS=DFS_status(1)
		/PRINT MEAN
		/PLOT SURVIVAL
		/TEST LOGRANK
		/COMPARE OVERALL POOLED.
		Kaplan-Meier
		Notes
		Output Created		12-FEB-2014 17:20:33
		Comments
		Input	Data	H:\validation study\103SNPs-codoprognostic-SPSS-Feb 12, 2014.sav
			Active Dataset	DataSet2
			Filter	<none>
			Weight	<none>
			Split File	<none>
			N of Rows in Working Data File	505
		Missing Value Handling	Definition of Missing	User-defined missing values are treated as missing.
			Cases Used	Statistics are based on all cases with valid data for all variables in the analysis.
		Syntax		KM DFS_time BY IRF2_rs13116389_G_T /STATUS=DFS_status(1) /PRINT MEAN /PLOT SURVIVAL /TEST LOGRANK /COMPARE OVERALL POOLED.
		Resources	Processor Time	00:00:00.16
			Elapsed Time	00:00:00.15
		[DataSet2] H:\validation study\103SNPs-codoprognostic-SPSS-Feb 12, 2014.sav
		Case Processing Summary
		IRF2_rs13116389_G_T	Total N	N of Events	Censored
					N	Percent
		GG	342	134	208	0.608187
		GT	152	60	92	0.605263
		TT	9	5	4	0.444444
		Overall	503	199	304	0.604374
		Means and Medians for Survival Time
		IRF2_rs13116389_G_T	Meana				Median
			Estimate	Std. Error	95% Confidence Interval		Estimate	Std. Error	95% Confidence Interval
					Lower Bound	Upper Bound			Lower Bound	Upper Bound
		GG	7.54416	0.225212	7.10275	7.98558	9.33699	0.418135	8.51744	10.1565
		GT	7.47843	0.296071	6.89813	8.05873
		TT	4.78959	1.17602	2.4846	7.09458	3.28493	0.721577	1.87064	4.69922
		Overall	7.56957	0.185712	7.20557	7.93357	9.39178	0.504066	8.40381	10.3798
		a. Estimation is limited to the largest survival time if it is censored.
		Overall Comparisons
			Chi-Square	df	Sig.
		Log Rank (Mantel-Cox)	2.4454	2	0.294434
		Test of equality of survival distributions for the different levels of IRF2_rs13116389_G_T.
none	IRF2_rs13116389_G_T
		KM DFS_time BY IRF2_rs3775582_G_A
		/STATUS=DFS_status(1)
		/PRINT MEAN
		/PLOT SURVIVAL
		/TEST LOGRANK
		/COMPARE OVERALL POOLED.
		Kaplan-Meier
		Notes
		Output Created		12-FEB-2014 17:20:40
		Comments
		Input	Data	H:\validation study\103SNPs-codoprognostic-SPSS-Feb 12, 2014.sav
			Active Dataset	DataSet2
			Filter	<none>
			Weight	<none>
			Split File	<none>
			N of Rows in Working Data File	505
		Missing Value Handling	Definition of Missing	User-defined missing values are treated as missing.
			Cases Used	Statistics are based on all cases with valid data for all variables in the analysis.
		Syntax		KM DFS_time BY IRF2_rs3775582_G_A /STATUS=DFS_status(1) /PRINT MEAN /PLOT SURVIVAL /TEST LOGRANK /COMPARE OVERALL POOLED.
		Resources	Processor Time	00:00:00.14
			Elapsed Time	00:00:00.14
		[DataSet2] H:\validation study\103SNPs-codoprognostic-SPSS-Feb 12, 2014.sav
		Case Processing Summary
		IRF2_rs3775582_G_A	Total N	N of Events	Censored
					N	Percent
		GG	391	155	236	0.603581
		GA	104	43	61	0.586538
		AA	8	1	7	0.875
		Overall	503	199	304	0.604374
		Means and Medians for Survival Time
		IRF2_rs3775582_G_A	Meana				Median
			Estimate	Std. Error	95% Confidence Interval		Estimate	Std. Error	95% Confidence Interval
					Lower Bound	Upper Bound			Lower Bound	Upper Bound
		GG	7.60755	0.209104	7.19771	8.0174	10.0658
		GA	7.12999	0.374768	6.39545	7.86453	8.85753	0.952965	6.98972	10.7253
		AA	8.52055	0.861094	6.8328	10.2083
		Overall	7.56957	0.185712	7.20557	7.93357	9.39178	0.504066	8.40381	10.3798
		a. Estimation is limited to the largest survival time if it is censored.
		Overall Comparisons
			Chi-Square	df	Sig.
		Log Rank (Mantel-Cox)	1.65567	2	0.436995
		Test of equality of survival distributions for the different levels of IRF2_rs3775582_G_A.
none	IRF2_rs3775582_G_A
		KM DFS_time BY MAP3K1_rs11960484_G_A
		/STATUS=DFS_status(1)
		/PRINT MEAN
		/PLOT SURVIVAL
		/TEST LOGRANK
		/COMPARE OVERALL POOLED.
		Kaplan-Meier
		Notes
		Output Created		12-FEB-2014 17:20:48
		Comments
		Input	Data	H:\validation study\103SNPs-codoprognostic-SPSS-Feb 12, 2014.sav
			Active Dataset	DataSet2
			Filter	<none>
			Weight	<none>
			Split File	<none>
			N of Rows in Working Data File	505
		Missing Value Handling	Definition of Missing	User-defined missing values are treated as missing.
			Cases Used	Statistics are based on all cases with valid data for all variables in the analysis.
		Syntax		KM DFS_time BY MAP3K1_rs11960484_G_A /STATUS=DFS_status(1) /PRINT MEAN /PLOT SURVIVAL /TEST LOGRANK /COMPARE OVERALL POOLED.
		Resources	Processor Time	00:00:00.14
			Elapsed Time	00:00:00.14
		[DataSet2] H:\validation study\103SNPs-codoprognostic-SPSS-Feb 12, 2014.sav
		Case Processing Summary
		MAP3K1 _rs11960484_G_A	Total N	N of Events	Censored
					N	Percent
		GG	194	73	121	0.623711
		GA	233	91	142	0.609442
		AA	76	35	41	0.539474
		Overall	503	199	304	0.604374
		Means and Medians for Survival Time
		MAP3K1 _rs11960484_G_A	Meana				Median
			Estimate	Std. Error	95% Confidence Interval		Estimate	Std. Error	95% Confidence Interval
					Lower Bound	Upper Bound			Lower Bound	Upper Bound
		GG	7.68001	0.279068	7.13304	8.22698
		GA	7.47844	0.289122	6.91176	8.04512	10.0658	1.32221	7.47421	12.6573
		AA	6.83974	0.425898	6.00498	7.6745	8.85753
		Overall	7.56957	0.185712	7.20557	7.93357	9.39178	0.504066	8.40381	10.3798
		a. Estimation is limited to the largest survival time if it is censored.
		Overall Comparisons
			Chi-Square	df	Sig.
		Log Rank (Mantel-Cox)	1.79755	2	0.407068
		Test of equality of survival distributions for the different levels of MAP3K1 _rs11960484_G_A.
recessive	MAP3K1 _rs11960484_G_A
		KM DFS_time BY MSH3_rs26784_T_C
		/STATUS=DFS_status(1)
		/PRINT MEAN
		/PLOT SURVIVAL
		/TEST LOGRANK
		/COMPARE OVERALL POOLED.
		Kaplan-Meier
		Notes
		Output Created		12-FEB-2014 17:20:56
		Comments
		Input	Data	H:\validation study\103SNPs-codoprognostic-SPSS-Feb 12, 2014.sav
			Active Dataset	DataSet2
			Filter	<none>
			Weight	<none>
			Split File	<none>
			N of Rows in Working Data File	505
		Missing Value Handling	Definition of Missing	User-defined missing values are treated as missing.
			Cases Used	Statistics are based on all cases with valid data for all variables in the analysis.
		Syntax		KM DFS_time BY MSH3_rs26784_T_C /STATUS=DFS_status(1) /PRINT MEAN /PLOT SURVIVAL /TEST LOGRANK /COMPARE OVERALL POOLED.
		Resources	Processor Time	00:00:00.14
			Elapsed Time	00:00:00.14
		[DataSet2] H:\validation study\103SNPs-codoprognostic-SPSS-Feb 12, 2014.sav
		Case Processing Summary
		MSH3_rs26784_T_C	Total N	N of Events	Censored
					N	Percent
		TT	182	72	110	0.604396
		TC	242	95	147	0.607438
		CC	79	32	47	0.594937
		Overall	503	199	304	0.604374
		Means and Medians for Survival Time
		MSH3_rs26784_T_C	Meana				Median
			Estimate	Std. Error	95% Confidence Interval		Estimate	Std. Error	95% Confidence Interval
					Lower Bound	Upper Bound			Lower Bound	Upper Bound
		TT	7.42932	0.300361	6.84061	8.01803
		TC	7.54405	0.267993	7.01878	8.06931	9.39178	0.674585	8.06959	10.714
		CC	7.35997	0.364296	6.64595	8.07398
		Overall	7.56957	0.185712	7.20557	7.93357	9.39178	0.504066	8.40381	10.3798
		a. Estimation is limited to the largest survival time if it is censored.
		Overall Comparisons
			Chi-Square	df	Sig.
		Log Rank (Mantel-Cox)	0.118293	2	0.942569
		Test of equality of survival distributions for the different levels of MSH3_rs26784_T_C.
none	MSH3_rs26784_T_C
		KM DFS_time BY IL3_rs181781_G_A
		/STATUS=DFS_status(1)
		/PRINT MEAN
		/PLOT SURVIVAL
		/TEST LOGRANK
		/COMPARE OVERALL POOLED.
		Kaplan-Meier
		Notes
		Output Created		12-FEB-2014 17:21:04
		Comments
		Input	Data	H:\validation study\103SNPs-codoprognostic-SPSS-Feb 12, 2014.sav
			Active Dataset	DataSet2
			Filter	<none>
			Weight	<none>
			Split File	<none>
			N of Rows in Working Data File	505
		Missing Value Handling	Definition of Missing	User-defined missing values are treated as missing.
			Cases Used	Statistics are based on all cases with valid data for all variables in the analysis.
		Syntax		KM DFS_time BY IL3_rs181781_G_A /STATUS=DFS_status(1) /PRINT MEAN /PLOT SURVIVAL /TEST LOGRANK /COMPARE OVERALL POOLED.
		Resources	Processor Time	00:00:00.14
			Elapsed Time	00:00:00.14
		[DataSet2] H:\validation study\103SNPs-codoprognostic-SPSS-Feb 12, 2014.sav
		Case Processing Summary
		IL3_rs181781_G_A	Total N	N of Events	Censored
					N	Percent
		GG	411	169	242	0.588808
		GA	87	29	58	0.666667
		AA	5	1	4	0.8
		Overall	503	199	304	0.604374
		Means and Medians for Survival Time
		IL3_rs181781_G_A	Meana				Median
			Estimate	Std. Error	95% Confidence Interval		Estimate	Std. Error	95% Confidence Interval
					Lower Bound	Upper Bound			Lower Bound	Upper Bound
		GG	7.35439	0.198578	6.96518	7.7436	10.0658
		GA	7.91944	0.446064	7.04516	8.79373	9.39178	0.477001	8.45686	10.3267
		AA	9.02009	0.730746	7.58783	10.4524
		Overall	7.56957	0.185712	7.20557	7.93357	9.39178	0.504066	8.40381	10.3798
		a. Estimation is limited to the largest survival time if it is censored.
		Overall Comparisons
			Chi-Square	df	Sig.
		Log Rank (Mantel-Cox)	2.68246	2	0.261524
		Test of equality of survival distributions for the different levels of IL3_rs181781_G_A.
dominant	IL3_rs181781_G_A
		KM DFS_time BY mir2191_rs213210_T_C
		/STATUS=DFS_status(1)
		/PRINT MEAN
		/PLOT SURVIVAL
		/TEST LOGRANK
		/COMPARE OVERALL POOLED.
		Kaplan-Meier
		Notes
		Output Created		12-FEB-2014 17:21:14
		Comments
		Input	Data	H:\validation study\103SNPs-codoprognostic-SPSS-Feb 12, 2014.sav
			Active Dataset	DataSet2
			Filter	<none>
			Weight	<none>
			Split File	<none>
			N of Rows in Working Data File	505
		Missing Value Handling	Definition of Missing	User-defined missing values are treated as missing.
			Cases Used	Statistics are based on all cases with valid data for all variables in the analysis.
		Syntax		KM DFS_time BY mir2191_rs213210_T_C /STATUS=DFS_status(1) /PRINT MEAN /PLOT SURVIVAL /TEST LOGRANK /COMPARE OVERALL POOLED.
		Resources	Processor Time	00:00:00.13
			Elapsed Time	00:00:00.14
		[DataSet2] H:\validation study\103SNPs-codoprognostic-SPSS-Feb 12, 2014.sav
		Case Processing Summary
		mir219-1_rs213210_T_C	Total N	N of Events	Censored
					N	Percent
		TT	426	176	250	0.586854
		TC	71	21	50	0.704225
		CC	6	2	4	0.666667
		Overall	503	199	304	0.604374
		Means and Medians for Survival Time
		mir219-1_rs213210_T_C	Meana				Median
			Estimate	Std. Error	95% Confidence Interval		Estimate	Std. Error	95% Confidence Interval
					Lower Bound	Upper Bound			Lower Bound	Upper Bound
		TT	7.45744	0.201267	7.06296	7.85193	9.39178	0.58864	8.23805	10.5455
		TC	7.9725	0.43871	7.11263	8.83237
		CC	6.19132	1.12245	3.99131	8.39133
		Overall	7.56957	0.185712	7.20557	7.93357	9.39178	0.504066	8.40381	10.3798
		a. Estimation is limited to the largest survival time if it is censored.
		Overall Comparisons
			Chi-Square	df	Sig.
		Log Rank (Mantel-Cox)	2.70621	2	0.258437
		Test of equality of survival distributions for the different levels of mir219-1_rs213210_T_C.
dominant	mir219-1_rs213210_T_C
		KM DFS_time BY XPO5_rs11077_A_C
		/STATUS=DFS_status(1)
		/PRINT MEAN
		/PLOT SURVIVAL
		/TEST LOGRANK
		/COMPARE OVERALL POOLED.
		Kaplan-Meier
		Notes
		Output Created		12-FEB-2014 17:21:25
		Comments
		Input	Data	H:\validation study\103SNPs-codoprognostic-SPSS-Feb 12, 2014.sav
			Active Dataset	DataSet2
			Filter	<none>
			Weight	<none>
			Split File	<none>
			N of Rows in Working Data File	505
		Missing Value Handling	Definition of Missing	User-defined missing values are treated as missing.
			Cases Used	Statistics are based on all cases with valid data for all variables in the analysis.
		Syntax		KM DFS_time BY XPO5_rs11077_A_C /STATUS=DFS_status(1) /PRINT MEAN /PLOT SURVIVAL /TEST LOGRANK /COMPARE OVERALL POOLED.
		Resources	Processor Time	00:00:00.14
			Elapsed Time	00:00:00.14
		[DataSet2] H:\validation study\103SNPs-codoprognostic-SPSS-Feb 12, 2014.sav
		Case Processing Summary
		XPO5 _rs11077_A_C	Total N	N of Events	Censored
					N	Percent
		AA	173	72	101	0.583815
		AC	240	88	152	0.633333
		CC	90	39	51	0.566667
		Overall	503	199	304	0.604374
		Means and Medians for Survival Time
		XPO5 _rs11077_A_C	Meana				Median
			Estimate	Std. Error	95% Confidence Interval		Estimate	Std. Error	95% Confidence Interval
					Lower Bound	Upper Bound			Lower Bound	Upper Bound
		AA	7.54278	0.308353	6.93841	8.14715
		AC	7.47933	0.242848	7.00334	7.95531	9.39178	0.465869	8.47868	10.3049
		CC	6.96553	0.39229	6.19664	7.73442	8.34521
		Overall	7.56957	0.185712	7.20557	7.93357	9.39178	0.504066	8.40381	10.3798
		a. Estimation is limited to the largest survival time if it is censored.
		Overall Comparisons
			Chi-Square	df	Sig.
		Log Rank (Mantel-Cox)	1.2574	2	0.533284
		Test of equality of survival distributions for the different levels of XPO5 _rs11077_A_C.
codominant	XPO5 _rs11077_A_C
		KM DFS_time BY IFNGR1_rs9376267_C_T
		/STATUS=DFS_status(1)
		/PRINT MEAN
		/PLOT SURVIVAL
		/TEST LOGRANK
		/COMPARE OVERALL POOLED.
		Kaplan-Meier
		Notes
		Output Created		12-FEB-2014 17:21:32
		Comments
		Input	Data	H:\validation study\103SNPs-codoprognostic-SPSS-Feb 12, 2014.sav
			Active Dataset	DataSet2
			Filter	<none>
			Weight	<none>
			Split File	<none>
			N of Rows in Working Data File	505
		Missing Value Handling	Definition of Missing	User-defined missing values are treated as missing.
			Cases Used	Statistics are based on all cases with valid data for all variables in the analysis.
		Syntax		KM DFS_time BY IFNGR1_rs9376267_C_T /STATUS=DFS_status(1) /PRINT MEAN /PLOT SURVIVAL /TEST LOGRANK /COMPARE OVERALL POOLED.
		Resources	Processor Time	00:00:00.13
			Elapsed Time	00:00:00.13
		[DataSet2] H:\validation study\103SNPs-codoprognostic-SPSS-Feb 12, 2014.sav
		Case Processing Summary
		IFNGR1_rs9376267_C_T	Total N	N of Events	Censored
					N	Percent
		CC	304	117	187	0.615132
		CT	166	68	98	0.590361
		TT	33	14	19	0.575758
		Overall	503	199	304	0.604374
		Means and Medians for Survival Time
		IFNGR1_rs9376267_C_T	Meana				Median
			Estimate	Std. Error	95% Confidence Interval		Estimate	Std. Error	95% Confidence Interval
					Lower Bound	Upper Bound			Lower Bound	Upper Bound
		CC	7.48166	0.213041	7.0641	7.89922	10.0658
		CT	7.20744	0.31764	6.58486	7.83001	8.72603	0.486147	7.77318	9.67888
		TT	7.47456	0.708058	6.08677	8.86235
		Overall	7.56957	0.185712	7.20557	7.93357	9.39178	0.504066	8.40381	10.3798
		a. Estimation is limited to the largest survival time if it is censored.
		Overall Comparisons
			Chi-Square	df	Sig.
		Log Rank (Mantel-Cox)	0.746107	2	0.688628
		Test of equality of survival distributions for the different levels of IFNGR1_rs9376267_C_T.
recessive, dominant	IFNGR1_rs9376267_C_T
		KM DFS_time BY IFNGR1_rs1327474_A_G
		/STATUS=DFS_status(1)
		/PRINT MEAN
		/PLOT SURVIVAL
		/TEST LOGRANK
		/COMPARE OVERALL POOLED.
		Kaplan-Meier
		Notes
		Output Created		12-FEB-2014 17:21:41
		Comments
		Input	Data	H:\validation study\103SNPs-codoprognostic-SPSS-Feb 12, 2014.sav
			Active Dataset	DataSet2
			Filter	<none>
			Weight	<none>
			Split File	<none>
			N of Rows in Working Data File	505
		Missing Value Handling	Definition of Missing	User-defined missing values are treated as missing.
			Cases Used	Statistics are based on all cases with valid data for all variables in the analysis.
		Syntax		KM DFS_time BY IFNGR1_rs1327474_A_G /STATUS=DFS_status(1) /PRINT MEAN /PLOT SURVIVAL /TEST LOGRANK /COMPARE OVERALL POOLED.
		Resources	Processor Time	00:00:00.23
			Elapsed Time	00:00:00.14
		[DataSet2] H:\validation study\103SNPs-codoprognostic-SPSS-Feb 12, 2014.sav
		Case Processing Summary
		IFNGR1_rs1327474_A_G	Total N	N of Events	Censored
					N	Percent
		AA	145	71	74	0.510345
		AG	238	86	152	0.638655
		GG	120	42	78	0.65
		Overall	503	199	304	0.604374
		Means and Medians for Survival Time
		IFNGR1_rs1327474_A_G	Meana				Median
			Estimate	Std. Error	95% Confidence Interval		Estimate	Std. Error	95% Confidence Interval
					Lower Bound	Upper Bound			Lower Bound	Upper Bound
		AA	6.75449	0.356723	6.05531	7.45367	7.89315	1.32557	5.29504	10.4913
		AG	7.71394	0.25379	7.21651	8.21137	10.0658	0.979151	8.14662	11.9849
		GG	7.73944	0.33377	7.08525	8.39362
		Overall	7.56957	0.185712	7.20557	7.93357	9.39178	0.504066	8.40381	10.3798
		a. Estimation is limited to the largest survival time if it is censored.
		Overall Comparisons
			Chi-Square	df	Sig.
		Log Rank (Mantel-Cox)	9.14553	2	0.0103293
		Test of equality of survival distributions for the different levels of IFNGR1_rs1327474_A_G.
dominant	IFNGR1_rs1327474_A_G
		KM DFS_time BY TNFAIP3_rs6920220_G_A
		/STATUS=DFS_status(1)
		/PRINT MEAN
		/PLOT SURVIVAL
		/TEST LOGRANK
		/COMPARE OVERALL POOLED.
		Kaplan-Meier
		Notes
		Output Created		12-FEB-2014 17:21:51
		Comments
		Input	Data	H:\validation study\103SNPs-codoprognostic-SPSS-Feb 12, 2014.sav
			Active Dataset	DataSet2
			Filter	<none>
			Weight	<none>
			Split File	<none>
			N of Rows in Working Data File	505
		Missing Value Handling	Definition of Missing	User-defined missing values are treated as missing.
			Cases Used	Statistics are based on all cases with valid data for all variables in the analysis.
		Syntax		KM DFS_time BY TNFAIP3_rs6920220_G_A /STATUS=DFS_status(1) /PRINT MEAN /PLOT SURVIVAL /TEST LOGRANK /COMPARE OVERALL POOLED.
		Resources	Processor Time	00:00:00.16
			Elapsed Time	00:00:00.14
		[DataSet2] H:\validation study\103SNPs-codoprognostic-SPSS-Feb 12, 2014.sav
		Case Processing Summary
		TNFAIP3_rs6920220_G_A	Total N	N of Events	Censored
					N	Percent
		GG	285	117	168	0.589474
		GA	182	73	109	0.598901
		AA	36	9	27	0.75
		Overall	503	199	304	0.604374
		Means and Medians for Survival Time
		TNFAIP3_rs6920220_G_A	Meana				Median
			Estimate	Std. Error	95% Confidence Interval		Estimate	Std. Error	95% Confidence Interval
					Lower Bound	Upper Bound			Lower Bound	Upper Bound
		GG	7.47207	0.246021	6.98987	7.95428	9.33699	0.609035	8.14328	10.5307
		GA	7.40929	0.297058	6.82706	7.99152
		AA	8.09642	0.486844	7.1422	9.05063	9.39178	2.18243	5.11422	13.6693
		Overall	7.56957	0.185712	7.20557	7.93357	9.39178	0.504066	8.40381	10.3798
		a. Estimation is limited to the largest survival time if it is censored.
		Overall Comparisons
			Chi-Square	df	Sig.
		Log Rank (Mantel-Cox)	3.21829	2	0.200058
		Test of equality of survival distributions for the different levels of TNFAIP3_rs6920220_G_A.
recessive	TNFAIP3_rs6920220_G_A
		KM DFS_time BY MACC1_rs1990172_T_G
		/STATUS=DFS_status(1)
		/PRINT MEAN
		/PLOT SURVIVAL
		/TEST LOGRANK
		/COMPARE OVERALL POOLED.
		Kaplan-Meier
		Notes
		Output Created		12-FEB-2014 17:22:05
		Comments
		Input	Data	H:\validation study\103SNPs-codoprognostic-SPSS-Feb 12, 2014.sav
			Active Dataset	DataSet2
			Filter	<none>
			Weight	<none>
			Split File	<none>
			N of Rows in Working Data File	505
		Missing Value Handling	Definition of Missing	User-defined missing values are treated as missing.
			Cases Used	Statistics are based on all cases with valid data for all variables in the analysis.
		Syntax		KM DFS_time BY MACC1_rs1990172_T_G /STATUS=DFS_status(1) /PRINT MEAN /PLOT SURVIVAL /TEST LOGRANK /COMPARE OVERALL POOLED.
		Resources	Processor Time	00:00:00.14
			Elapsed Time	00:00:00.14
		[DataSet2] H:\validation study\103SNPs-codoprognostic-SPSS-Feb 12, 2014.sav
		Case Processing Summary
		MACC1_rs1990172_T_G	Total N	N of Events	Censored
					N	Percent
		TT	265	108	157	0.592453
		TG	209	78	131	0.626794
		GG	29	13	16	0.551724
		Overall	503	199	304	0.604374
		Means and Medians for Survival Time
		MACC1_rs1990172_T_G	Meana				Median
			Estimate	Std. Error	95% Confidence Interval		Estimate	Std. Error	95% Confidence Interval
					Lower Bound	Upper Bound			Lower Bound	Upper Bound
		TT	7.47663	0.24041	7.00542	7.94783	9.33699
		TG	7.43165	0.266671	6.90898	7.95433
		GG	7.15023	0.743839	5.69231	8.60815	8.85753	2.88464	3.20364	14.5114
		Overall	7.56957	0.185712	7.20557	7.93357	9.39178	0.504066	8.40381	10.3798
		a. Estimation is limited to the largest survival time if it is censored.
		Overall Comparisons
			Chi-Square	df	Sig.
		Log Rank (Mantel-Cox)	0.422946	2	0.809391
		Test of equality of survival distributions for the different levels of MACC1_rs1990172_T_G.
none	MACC1_rs1990172_T_G
		KM DFS_time BY EZH2_rs3757441_T_C
		/STATUS=DFS_status(1)
		/PRINT MEAN
		/PLOT SURVIVAL
		/TEST LOGRANK
		/COMPARE OVERALL POOLED.
		Kaplan-Meier
		Notes
		Output Created		12-FEB-2014 17:22:13
		Comments
		Input	Data	H:\validation study\103SNPs-codoprognostic-SPSS-Feb 12, 2014.sav
			Active Dataset	DataSet2
			Filter	<none>
			Weight	<none>
			Split File	<none>
			N of Rows in Working Data File	505
		Missing Value Handling	Definition of Missing	User-defined missing values are treated as missing.
			Cases Used	Statistics are based on all cases with valid data for all variables in the analysis.
		Syntax		KM DFS_time BY EZH2_rs3757441_T_C /STATUS=DFS_status(1) /PRINT MEAN /PLOT SURVIVAL /TEST LOGRANK /COMPARE OVERALL POOLED.
		Resources	Processor Time	00:00:00.14
			Elapsed Time	00:00:00.14
		[DataSet2] H:\validation study\103SNPs-codoprognostic-SPSS-Feb 12, 2014.sav
		Case Processing Summary
		EZH2_rs3757441_T_C	Total N	N of Events	Censored
					N	Percent
		TT	246	103	143	0.581301
		TC	208	78	130	0.625
		CC	49	18	31	0.632653
		Overall	503	199	304	0.604374
		Means and Medians for Survival Time
		EZH2_rs3757441_T_C	Meana				Median
			Estimate	Std. Error	95% Confidence Interval		Estimate	Std. Error	95% Confidence Interval
					Lower Bound	Upper Bound			Lower Bound	Upper Bound
		TT	7.31646	0.255003	6.81665	7.81626	9.39178
		TC	7.69044	0.290922	7.12023	8.26065	9.33699
		CC	7.63782	0.501268	6.65533	8.6203	8.70137	1.80599	5.16163	12.2411
		Overall	7.56957	0.185712	7.20557	7.93357	9.39178	0.504066	8.40381	10.3798
		a. Estimation is limited to the largest survival time if it is censored.
		Overall Comparisons
			Chi-Square	df	Sig.
		Log Rank (Mantel-Cox)	1.26462	2	0.531364
		Test of equality of survival distributions for the different levels of EZH2_rs3757441_T_C.
recessive, dominant	EZH2_rs3757441_T_C
		KM DFS_time BY EBF2_rs4568629_A_G
		/STATUS=DFS_status(1)
		/PRINT MEAN
		/PLOT SURVIVAL
		/TEST LOGRANK
		/COMPARE OVERALL POOLED.
		Kaplan-Meier
		Notes
		Output Created		12-FEB-2014 17:22:21
		Comments
		Input	Data	H:\validation study\103SNPs-codoprognostic-SPSS-Feb 12, 2014.sav
			Active Dataset	DataSet2
			Filter	<none>
			Weight	<none>
			Split File	<none>
			N of Rows in Working Data File	505
		Missing Value Handling	Definition of Missing	User-defined missing values are treated as missing.
			Cases Used	Statistics are based on all cases with valid data for all variables in the analysis.
		Syntax		KM DFS_time BY EBF2_rs4568629_A_G /STATUS=DFS_status(1) /PRINT MEAN /PLOT SURVIVAL /TEST LOGRANK /COMPARE OVERALL POOLED.
		Resources	Processor Time	00:00:00.13
			Elapsed Time	00:00:00.15
		[DataSet2] H:\validation study\103SNPs-codoprognostic-SPSS-Feb 12, 2014.sav
		Case Processing Summary
		EBF2_rs4568629_A_G	Total N	N of Events	Censored
					N	Percent
		AA	129	51	78	0.604651
		AG	271	106	165	0.608856
		GG	103	42	61	0.592233
		Overall	503	199	304	0.604374
		Means and Medians for Survival Time
		EBF2_rs4568629_A_G	Meana				Median
			Estimate	Std. Error	95% Confidence Interval		Estimate	Std. Error	95% Confidence Interval
					Lower Bound	Upper Bound			Lower Bound	Upper Bound
		AA	7.49495	0.348363	6.81216	8.17774	8.70137
		AG	7.33482	0.233351	6.87745	7.79219	9.39178
		GG	7.4887	0.404355	6.69616	8.28124	10.0658	2.1378	5.87566	14.2559
		Overall	7.56957	0.185712	7.20557	7.93357	9.39178	0.504066	8.40381	10.3798
		a. Estimation is limited to the largest survival time if it is censored.
		Overall Comparisons
			Chi-Square	df	Sig.
		Log Rank (Mantel-Cox)	0.138464	2	0.93311
		Test of equality of survival distributions for the different levels of EBF2_rs4568629_A_G.
none	EBF2_rs4568629_A_G
		KM DFS_time BY ANGPT1_rs1954727_C_G
		/STATUS=DFS_status(1)
		/PRINT MEAN
		/PLOT SURVIVAL
		/TEST LOGRANK
		/COMPARE OVERALL POOLED.
		Kaplan-Meier
		Notes
		Output Created		12-FEB-2014 17:22:28
		Comments
		Input	Data	H:\validation study\103SNPs-codoprognostic-SPSS-Feb 12, 2014.sav
			Active Dataset	DataSet2
			Filter	<none>
			Weight	<none>
			Split File	<none>
			N of Rows in Working Data File	505
		Missing Value Handling	Definition of Missing	User-defined missing values are treated as missing.
			Cases Used	Statistics are based on all cases with valid data for all variables in the analysis.
		Syntax		KM DFS_time BY ANGPT1_rs1954727_C_G /STATUS=DFS_status(1) /PRINT MEAN /PLOT SURVIVAL /TEST LOGRANK /COMPARE OVERALL POOLED.
		Resources	Processor Time	00:00:00.13
			Elapsed Time	00:00:00.13
		[DataSet2] H:\validation study\103SNPs-codoprognostic-SPSS-Feb 12, 2014.sav
		Case Processing Summary
		ANGPT1_rs1954727_C_G	Total N	N of Events	Censored
					N	Percent
		CC	245	93	152	0.620408
		CG	217	86	131	0.603687
		GG	41	20	21	0.512195
		Overall	503	199	304	0.604374
		Means and Medians for Survival Time
		ANGPT1_rs1954727_C_G	Meana				Median
			Estimate	Std. Error	95% Confidence Interval		Estimate	Std. Error	95% Confidence Interval
					Lower Bound	Upper Bound			Lower Bound	Upper Bound
		CC	7.45877	0.236488	6.99525	7.92229	9.39178	0.449871	8.51003	10.2735
		CG	7.58377	0.283533	7.02805	8.1395
		GG	6.58611	0.574801	5.4595	7.71272	6.22192	1.74901	2.79386	9.64997
		Overall	7.56957	0.185712	7.20557	7.93357	9.39178	0.504066	8.40381	10.3798
		a. Estimation is limited to the largest survival time if it is censored.
		Overall Comparisons
			Chi-Square	df	Sig.
		Log Rank (Mantel-Cox)	2.02672	2	0.362998
		Test of equality of survival distributions for the different levels of ANGPT1_rs1954727_C_G.
recessive	ANGPT1_rs1954727_C_G
		KM DFS_time BY near_POU5F1B_rs10505477_T_C
		/STATUS=DFS_status(1)
		/PRINT MEAN
		/PLOT SURVIVAL
		/TEST LOGRANK
		/COMPARE OVERALL POOLED.
		Kaplan-Meier
		Notes
		Output Created		12-FEB-2014 17:22:37
		Comments
		Input	Data	H:\validation study\103SNPs-codoprognostic-SPSS-Feb 12, 2014.sav
			Active Dataset	DataSet2
			Filter	<none>
			Weight	<none>
			Split File	<none>
			N of Rows in Working Data File	505
		Missing Value Handling	Definition of Missing	User-defined missing values are treated as missing.
			Cases Used	Statistics are based on all cases with valid data for all variables in the analysis.
		Syntax		KM DFS_time BY near_POU5F1B_rs10505477_T_C /STATUS=DFS_status(1) /PRINT MEAN /PLOT SURVIVAL /TEST LOGRANK /COMPARE OVERALL POOLED.
		Resources	Processor Time	00:00:00.14
			Elapsed Time	00:00:00.14
		[DataSet2] H:\validation study\103SNPs-codoprognostic-SPSS-Feb 12, 2014.sav
		Case Processing Summary
		near_POU5F1B_rs10505477_T_C	Total N	N of Events	Censored
					N	Percent
		TT	144	56	88	0.611111
		TC	247	103	144	0.582996
		CC	112	40	72	0.642857
		Overall	503	199	304	0.604374
		Means and Medians for Survival Time
		near_POU5F1B_rs10505477_T_C	Meana				Median
			Estimate	Std. Error	95% Confidence Interval		Estimate	Std. Error	95% Confidence Interval
					Lower Bound	Upper Bound			Lower Bound	Upper Bound
		TT	7.49284	0.299025	6.90675	8.07893	10.0658	1.82344	6.49182	13.6397
		TC	7.37735	0.268354	6.85137	7.90332	9.39178
		CC	7.55253	0.35295	6.86075	8.24431	9.33699	0.770441	7.82692	10.8471
		Overall	7.56957	0.185712	7.20557	7.93357	9.39178	0.504066	8.40381	10.3798
		a. Estimation is limited to the largest survival time if it is censored.
		Overall Comparisons
			Chi-Square	df	Sig.
		Log Rank (Mantel-Cox)	1.87241	2	0.392113
		Test of equality of survival distributions for the different levels of near_POU5F1B_rs10505477_T_C.
recessive	near_POU5F1B_rs10505477_T_C
		KM DFS_time BY near_MYC_rs6983267_G_T
		/STATUS=DFS_status(1)
		/PRINT MEAN
		/PLOT SURVIVAL
		/TEST LOGRANK
		/COMPARE OVERALL POOLED.
		Kaplan-Meier
		Notes
		Output Created		12-FEB-2014 17:22:45
		Comments
		Input	Data	H:\validation study\103SNPs-codoprognostic-SPSS-Feb 12, 2014.sav
			Active Dataset	DataSet2
			Filter	<none>
			Weight	<none>
			Split File	<none>
			N of Rows in Working Data File	505
		Missing Value Handling	Definition of Missing	User-defined missing values are treated as missing.
			Cases Used	Statistics are based on all cases with valid data for all variables in the analysis.
		Syntax		KM DFS_time BY near_MYC_rs6983267_G_T /STATUS=DFS_status(1) /PRINT MEAN /PLOT SURVIVAL /TEST LOGRANK /COMPARE OVERALL POOLED.
		Resources	Processor Time	00:00:00.14
			Elapsed Time	00:00:00.14
		[DataSet2] H:\validation study\103SNPs-codoprognostic-SPSS-Feb 12, 2014.sav
		Case Processing Summary
		near_MYC_rs6983267_G_T	Total N	N of Events	Censored
					N	Percent
		GG	149	61	88	0.590604
		GT	247	99	148	0.59919
		TT	107	39	68	0.635514
		Overall	503	199	304	0.604374
		Means and Medians for Survival Time
		near_MYC_rs6983267_G_T	Meana				Median
			Estimate	Std. Error	95% Confidence Interval		Estimate	Std. Error	95% Confidence Interval
					Lower Bound	Upper Bound			Lower Bound	Upper Bound
		GG	7.35667	0.299385	6.76988	7.94347	10.0658	1.82516	6.48845	13.6431
		GT	7.50072	0.26712	6.97717	8.02428
		TT	7.49575	0.361613	6.78699	8.20451	9.33699	0.741305	7.88403	10.7899
		Overall	7.56957	0.185712	7.20557	7.93357	9.39178	0.504066	8.40381	10.3798
		a. Estimation is limited to the largest survival time if it is censored.
		Overall Comparisons
			Chi-Square	df	Sig.
		Log Rank (Mantel-Cox)	0.841537	2	0.656542
		Test of equality of survival distributions for the different levels of near_MYC_rs6983267_G_T.
recessive	near_MYC_rs6983267_G_T
		KM DFS_time BY GWAS_associated_susceptibility_allele_rs7014346_G_A
		/STATUS=DFS_status(1)
		/PRINT MEAN
		/PLOT SURVIVAL
		/TEST LOGRANK
		/COMPARE OVERALL POOLED.
		Kaplan-Meier
		Notes
		Output Created		12-FEB-2014 17:22:53
		Comments
		Input	Data	H:\validation study\103SNPs-codoprognostic-SPSS-Feb 12, 2014.sav
			Active Dataset	DataSet2
			Filter	<none>
			Weight	<none>
			Split File	<none>
			N of Rows in Working Data File	505
		Missing Value Handling	Definition of Missing	User-defined missing values are treated as missing.
			Cases Used	Statistics are based on all cases with valid data for all variables in the analysis.
		Syntax		KM DFS_time BY GWAS_associated_susceptibility_allele_rs7014346_G_A /STATUS=DFS_status(1) /PRINT MEAN /PLOT SURVIVAL /TEST LOGRANK /COMPARE OVERALL POOLED.
		Resources	Processor Time	00:00:00.13
			Elapsed Time	00:00:00.13
		[DataSet2] H:\validation study\103SNPs-codoprognostic-SPSS-Feb 12, 2014.sav
		Case Processing Summary
		GWAS-associated_susceptibility_allele_rs7014346_G_A	Total N	N of Events	Censored
					N	Percent
		GG	179	66	113	0.631285
		GA	241	101	140	0.580913
		AA	83	32	51	0.614458
		Overall	503	199	304	0.604374
		Means and Medians for Survival Time
		GWAS-associated_susceptibility_allele_rs7014346_G_A	Meana				Median
			Estimate	Std. Error	95% Confidence Interval		Estimate	Std. Error	95% Confidence Interval
					Lower Bound	Upper Bound			Lower Bound	Upper Bound
		GG	7.78123	0.305907	7.18165	8.38081	9.33699	0.412976	8.52755	10.1464
		GA	7.27189	0.260486	6.76134	7.78245	8.85753
		AA	7.44121	0.402333	6.65264	8.22978	10.0658	2.02966	6.08762	14.0439
		Overall	7.56957	0.185712	7.20557	7.93357	9.39178	0.504066	8.40381	10.3798
		a. Estimation is limited to the largest survival time if it is censored.
		Overall Comparisons
			Chi-Square	df	Sig.
		Log Rank (Mantel-Cox)	1.65575	2	0.436976
		Test of equality of survival distributions for the different levels of GWAS-associated_susceptibility_allele_rs7014346_G_A.
dominant, codominant	GWAS-associated_susceptibility_allele_rs7014346_G_A
		KM DFS_time BY TLR4_rs1554973_T_C
		/STATUS=DFS_status(1)
		/PRINT MEAN
		/PLOT SURVIVAL
		/TEST LOGRANK
		/COMPARE OVERALL POOLED.
		Kaplan-Meier
		Notes
		Output Created		12-FEB-2014 17:23:13
		Comments
		Input	Data	H:\validation study\103SNPs-codoprognostic-SPSS-Feb 12, 2014.sav
			Active Dataset	DataSet2
			Filter	<none>
			Weight	<none>
			Split File	<none>
			N of Rows in Working Data File	505
		Missing Value Handling	Definition of Missing	User-defined missing values are treated as missing.
			Cases Used	Statistics are based on all cases with valid data for all variables in the analysis.
		Syntax		KM DFS_time BY TLR4_rs1554973_T_C /STATUS=DFS_status(1) /PRINT MEAN /PLOT SURVIVAL /TEST LOGRANK /COMPARE OVERALL POOLED.
		Resources	Processor Time	00:00:00.14
			Elapsed Time	00:00:00.14
		[DataSet2] H:\validation study\103SNPs-codoprognostic-SPSS-Feb 12, 2014.sav
		Case Processing Summary
		TLR4_rs1554973_T_C	Total N	N of Events	Censored
					N	Percent
		TT	280	113	167	0.596429
		TC	193	76	117	0.606218
		CC	30	10	20	0.666667
		Overall	503	199	304	0.604374
		Means and Medians for Survival Time
		TLR4_rs1554973_T_C	Meana				Median
			Estimate	Std. Error	95% Confidence Interval		Estimate	Std. Error	95% Confidence Interval
					Lower Bound	Upper Bound			Lower Bound	Upper Bound
		TT	7.26132	0.22762	6.81519	7.70745	8.85753
		TC	7.6297	0.295935	7.04967	8.20973	10.0658	0.65718	8.77768	11.3538
		CC	7.12031	0.527871	6.08568	8.15494
		Overall	7.56957	0.185712	7.20557	7.93357	9.39178	0.504066	8.40381	10.3798
		a. Estimation is limited to the largest survival time if it is censored.
		Overall Comparisons
			Chi-Square	df	Sig.
		Log Rank (Mantel-Cox)	0.457006	2	0.795724
		Test of equality of survival distributions for the different levels of TLR4_rs1554973_T_C.
recessive	TLR4_rs1554973_T_C
		KM DFS_time BY PTGS1_rs1213266_G_A
		/STATUS=DFS_status(1)
		/PRINT MEAN
		/PLOT SURVIVAL
		/TEST LOGRANK
		/COMPARE OVERALL POOLED.
		Kaplan-Meier
		Notes
		Output Created		12-FEB-2014 17:23:20
		Comments
		Input	Data	H:\validation study\103SNPs-codoprognostic-SPSS-Feb 12, 2014.sav
			Active Dataset	DataSet2
			Filter	<none>
			Weight	<none>
			Split File	<none>
			N of Rows in Working Data File	505
		Missing Value Handling	Definition of Missing	User-defined missing values are treated as missing.
			Cases Used	Statistics are based on all cases with valid data for all variables in the analysis.
		Syntax		KM DFS_time BY PTGS1_rs1213266_G_A /STATUS=DFS_status(1) /PRINT MEAN /PLOT SURVIVAL /TEST LOGRANK /COMPARE OVERALL POOLED.
		Resources	Processor Time	00:00:00.14
			Elapsed Time	00:00:00.14
		[DataSet2] H:\validation study\103SNPs-codoprognostic-SPSS-Feb 12, 2014.sav
		Warnings
		No statistics are computed because all cases are censored.
		Case Processing Summary
		PTGS1_rs1213266_G_A	Total N	N of Events	Censored
					N	Percent
[truncated: 2,353 more rows]

## Sheet: Additional File-6
		Cox regression analysis results for overall survival (univariate)							Cox regression analysis results for overall survival (adjusted for stage)
	SNP	*p-value	HR	95% CI for HR					*p-value	HR	95% CI for HR
genetic model used in Cox regression analysis				Lower	Upper	n	FDR q-value				Lower	Upper	n	FDR q-value
additive	MAP3K12_rs784567_T_C	0.136993	0.851892	0.689654	1.05229	504	0.575379		0.562569	0.938412	0.756742	1.16369	504	0.800053
additive	near_BMP2_rs6038483_C_A	0.0237526	1.3005	1.03561	1.63314	504	0.3888		0.0136878	1.33141	1.06043	1.67162	504	0.351
dominant	SELE_rs5361_A_C_dom (AC+CC vs AA)	0.543342	1.13415	0.755732	1.70204	504	0.687234		0.5407	1.13552	0.755722	1.70618	504	0.800053
dominant	PTGS2_rs5275_T_C_dom (TC+CC vs TT)	0.205534	1.21721	0.897842	1.65019	504	0.575379		0.0811066	1.31315	0.966878	1.78343	504	0.532286
dominant	DUSP2_rs1724120_G_A_dom (GA+AA vs GG)	0.356424	1.16502	0.842084	1.61179	504	0.646442		0.286502	1.19322	0.862257	1.65123	504	0.64575
dominant	RAF1_rs9809501_T_G_dom (TG+GG vs TT)	0.386858	1.17026	0.819638	1.67088	504	0.646442		0.559927	1.11226	0.777778	1.59058	504	0.800053
dominant	IRF2_rs7685698_T_C_dom (TC+CC vs TT)	0.202517	1.23802	0.891495	1.71924	504	0.575379		0.172864	1.25737	0.904571	1.74778	504	0.586552
dominant	IL3_rs181781_G_A_dom (GA+AA vs GG)	0.327808	0.811626	0.534319	1.23285	504	0.646442		0.15657	0.738536	0.485588	1.12325	504	0.586552
dominant	mir2191_rs213210_T_C_dom (TC+CC vs TT)	0.407754	0.82759	0.528738	1.29536	504	0.646442		0.810581	0.946173	0.601821	1.48756	504	0.967235
dominant	IFNGR1_rs1327474_A_G_dom (AG+GG vs AA)	0.00314111	0.624199	0.456564	0.853384	504	0.243		0.0215726	0.690784	0.503855	0.947062	504	0.351
dominant	GWASassociated_susceptibility_allele_rs7014346_G_A_dom (GA+AA vs GG)	0.0982893	1.31514	0.950439	1.81978	504	0.557471		0.332993	1.17557	0.847283	1.63105	504	0.691615
dominant	PTGS1_rs9299281_A_G_dom (AG+GG vs AA)	0.106044	1.32197	0.942366	1.85449	504	0.557471		0.321537	1.18875	0.844546	1.67325	504	0.686368
dominant	HSPA5_rs391957_C_T_dom (CT+TT vs CC)	0.0677107	0.751477	0.55309	1.02102	504	0.557471		0.0257179	0.705168	0.51878	0.958524	504	0.351
dominant	MIR608_rs4919510_C_G_dom (CG_GG vs CC)	0.346716	0.857584	0.622727	1.18101	504	0.646442		0.999869	0.999973	0.722598	1.38382	504	1
dominant	TECTB_rs7896275_A_G_dom (AG+GG vs AA)	0.298436	1.23325	0.830661	1.83096	504	0.646442		0.312681	1.22667	0.825049	1.8238	504	0.685216
dominant	LGR5_rs17109924_T_C_dom (TC+CC vs TT)	0.23743	0.759219	0.480728	1.19904	504	0.581727		0.198458	0.740622	0.468646	1.17044	504	0.586552
dominant	ESR2_rs1152582_C_G_dom (CG_GG vs CC)	0.882146	0.975179	0.699475	1.35956	504	0.904329		0.956051	0.990669	0.709777	1.38272	504	1
dominant	ESR2_rs2978381_T_C_dom (TC+CC vs TT)	0.555769	0.911781	0.670583	1.23973	504	0.687309		0.634444	0.927383	0.679673	1.26537	504	0.8559
dominant (please note that the codominant is the best )	15q13_rs4779584_C_T_dom (CT+TT vs CC)	0.0804018	0.746091	0.537263	1.03609	504
dominant	GEMIN4_rs7813_T_C_dom (TC+CC vs TT)	0.620762	0.921317	0.665916	1.27467	504	0.708465		0.501941	0.894481	0.645959	1.23862	504	0.800053
dominant	MIR373_rs12983273_C_T_dom (CT+TT vs CC)	0.154059	1.25954	0.91709	1.72986	503	0.575379		0.107251	1.30001	0.944691	1.78896	503	0.541687
dominant	near_BMP2_rs355530_A_C_dom (AC+CC vs AA)	0.0331182	1.41179	1.02801	1.93885	504	0.4455		0.0158628	1.47871	1.07607	2.03201	504	0.351
recessive	DDX20_rs197412_T_C_rec (CC vs CT+TT)	0.11023	0.64918	0.382039	1.10312	504	0.557471		0.23689	0.725605	0.426454	1.23461	504	0.608657
recessive (please note that the dominant is the best )	PTGS2_rs5275_T_C_rec (CC vs CT+TT)	0.72527	1.08735	0.68161	1.7346	504
recessive	MSH2_rs7607076_A_G_rec (GG vs AG+AA)	0.314583	0.761247	0.447327	1.29547	504	0.646442		0.235275	0.723385	0.423778	1.23481	504	0.608657
recessive	MSH6_rs3136245_C_T_rec (TT vs CT+CC)	0.37925	0.64082	0.237651	1.72796	503	0.646442		0.059504	0.382555	0.140821	1.03926	503	0.532286
recessive	IL1A_rs10496444_T_C_rec (CC vs CT+TT)	0.0900552	1.44428	0.94418	2.20928	504	0.557471		0.262597	1.27798	0.832065	1.96285	504	0.608657
recessive	RAF1_rs7643321_A_G_rec (GG vs AG+AA)	0.323651	0.562319	0.179265	1.76388	504	0.646442		0.58999	0.729259	0.231281	2.29945	504	0.81
recessive	mir26a1_rs7372209_C_T_rec (TT vs CT+CC)	0.106402	1.4716	0.920676	2.35218	504	0.557471		0.165637	1.3956	0.871175	2.23571	504	0.586552
recessive	ALCAM_rs1157_C_T_rec (TT vs CT+CC)	0.593959	0.801179	0.354644	1.80995	504	0.697304		0.665296	0.83506	0.369025	1.88964	504	0.86879
recessive	CD47_rs12695175_A_C_rec (CC vs AC+AA)	0.56531	0.715188	0.228123	2.24219	504	0.687309		0.860702	1.10948	0.347681	3.54044	504	0.9963
recessive	CLOCK_rs1801260_T_C_rec (CC vs CT+TT)	0.466825	0.754785	0.353783	1.61031	503	0.675482		0.911805	0.957755	0.446217	2.05572	503	1
recessive	EGF_rs4444903_A_G_rec (GG vs AG+AA)	0.179666	1.30167	0.885622	1.91316	503	0.575379		0.0915709	1.40368	0.946648	2.08137	503	0.532286
recessive	IRF2_rs3822118_C_T_rec (TT vs CT+CC)	0.364164	0.769409	0.436793	1.35531	504	0.646442		0.715299	0.899592	0.50946	1.58848	504	0.899723
recessive	XPO5_rs11077_A_C_rec (CC vs AC+AA)	0.495185	1.1415	0.780402	1.66969	504	0.679576		0.0683414	1.43504	0.973176	2.11609	504	0.532286
recessive	IFNGR1_rs9376267_C_T_rec (TT vs CT+CC)	0.664992	1.13333	0.643182	1.997	504	0.737877		0.85493	1.05461	0.596427	1.86477	504	0.9963
recessive	TNFAIP3_rs6920220_G_A_rec (AA vs AG+GG)	0.181433	0.616204	0.302917	1.2535	504	0.575379		0.519158	0.790625	0.387045	1.61503	504	0.800053
recessive	EZH2_rs3757441_T_C_rec (CC vs CT+TT)	0.452386	0.816019	0.480166	1.38679	504	0.668618		0.513793	0.837636	0.492138	1.42569	504	0.800053
recessive	ANGPT1_rs1954727_C_G_rec (GG vs CG+CC)	0.167598	1.42325	0.862135	2.34957	504	0.575379		0.554368	1.16551	0.70147	1.93653	504	0.800053
recessive	near_POU5F1B_rs10505477_T_C_rec (CC vs CT+TT)	0.0768947	0.703377	0.4763	1.03872	504	0.557471		0.262437	0.798509	0.53873	1.18355	504	0.608657
recessive	near_MYC_rs6983267_G_T_rec (TT vs GT+GG)	0.168301	0.760418	0.515028	1.12273	504	0.575379		0.482269	0.868671	0.586546	1.2865	504	0.800053
recessive	MIR604_rs2368392_C_T_rec (TT vs CT+CC)	0.116901	0.566672	0.278603	1.1526	504	0.557471		0.179808	0.614644	0.301831	1.25165	504	0.586552
recessive	SCD_rs7849_A_G_rec (GG vs AG+AA)	0.394338	0.608766	0.194295	1.90738	504	0.646442		0.692016	0.792668	0.251076	2.50252	504	0.889714
recessive	CASP7_rs2227310_C_G_rec (GG vs CG+CC)	0.575721	1.1755	0.667262	2.07084	504	0.687309		0.976778	1.00848	0.571181	1.78057	504	1
recessive (please note that the codominant is the best )	RRM1_rs12806698_C_A_rec (AA vs CA+CC)	0.406717	0.77189	0.418724	1.42293	504
recessive	CD44_rs8193_C_T_rec (TT vs CT+CC)	0.374246	0.796674	0.482531	1.31534	504	0.646442		0.0356277	0.577408	0.345934	0.963769	504	0.416571
recessive	MAP3K11_rs1151488_A_G_rec (GG vs AG+AA)	0.233834	1.32921	0.831999	2.12357	504	0.581727		0.0823876	1.51878	0.947769	2.43382	504	0.532286
recessive (please note that the codominant is the best )	PGR_rs608995_A_T_rec (TT vs TA+AA)	0.411692	0.71075	0.314549	1.606	503
recessive (please note that the codominant is the best )	PGR_rs1042838_G_T_rec (TT vs TG+GG)	0.55771	0.710535	0.226672	2.22727	504
recessive	PGR_rs543215_A_G_rec (GG vs AG+AA)	0.57661	1.24153	0.580944	2.65328	504	0.687309		0.404666	1.38409	0.644385	2.97291	504	0.745568
recessive	LOC120376_locus_rs10749971_A_G_rec (GG vs AG+AA)	0.0137262	0.502632	0.290834	0.868668	504	0.378		0.0188404	0.518731	0.299959	0.897062	504	0.351
recessive (please note that the additive is the best )	MAP3K12_rs784567_T_C_rec (CC vs CT+TT)	0.222669	0.795331	0.550434	1.14919	504
recessive	IGF1_rs6220_A_G_rec (GG vs AG+AA)	0.609423	0.85806	0.476948	1.54371	504	0.7047		0.393647	0.773927	0.429505	1.39454	504	0.745568
recessive	ESR2_rs8006145_C_A_rec (AA vs AC+CC)	0.528808	0.795793	0.39093	1.61995	504	0.687234		0.573922	0.814945	0.399345	1.66306	504	0.801621
recessive	ESR2_rs4986938_G_A_rec (AA vs AG+GG)	0.915906	1.02556	0.641983	1.63831	504	0.92745		0.984982	1.00452	0.628266	1.6061	504	1
recessive	ESR2_rs1256030_T_C_rec (CC vs CT+TT)	0.537993	0.896171	0.632228	1.27031	504	0.687234		0.722123	0.938453	0.661252	1.33186	504	0.899723
recessive	ESR2_rs2987983_T_C_rec (CC vs CT+TT)	0.414636	0.783163	0.435331	1.40891	504	0.646442		0.942317	1.02217	0.564349	1.8514	504	1
recessive	ESR2_rs3020443_A_C_rec (CC vs AC+AA)	0.686417	0.863911	0.424663	1.7575	504	0.750892		0.559757	1.2393	0.602616	2.54865	504	0.800053
recessive	DICER1_rs13078_T_A_rec (AA vs AT+TT)	0.742731	0.861502	0.353723	2.09821	504	0.791882		0.91497	1.04984	0.429895	2.56381	504	1
recessive	IRF8_rs16882_A_G_rec (GG vs AG+AA)	0.367315	0.591233	0.1886	1.85342	504	0.646442		0.3956	0.609297	0.194263	1.91103	504	0.745568
recessive	IRF8_rs1044873_C_T_rec (TT vs CT+CC)	0.143528	0.715004	0.456139	1.12078	504	0.575379		0.0866084	0.674789	0.4303	1.05819	504	0.532286
recessive	SHMT1_rs1979277_G_A_rec (AA vs AG+GG)	0.517982	1.1754	0.720099	1.91858	504	0.687234		0.459448	1.20471	0.735509	1.97322	504	0.791043
recessive	MIR423_rs6505162_A_C_rec (CC vs AC+AA)	0.111926	1.34034	0.934028	1.92339	504	0.557471		0.208673	1.26175	0.87813	1.81297	504	0.586552
recessive (please note that the additive is the best )	near_BMP2_rs6038483_C_A_rec (AA vs AC+CC)	0.142868	1.37359	0.898356	2.10022	504
codominant	CRP_rs1205_C_T	0.40033				504	0.646442		0.513084				504	0.800053
	CRP_rs1205_C_T (CT vs CC)	0.185274	0.804228	0.582615	1.11014		0.575379		0.248415	0.82616	0.597351	1.14261		0.608657
	CRP_rs1205_C_T (TT vs CC)	0.47908	0.842009	0.523006	1.35558		0.677328		0.663683	0.89966	0.55859	1.44899		0.86879
codominant (please note that the dominant is the best )	PTGS2_rs5275_T_C	0.44757				504
	PTGS2_rs5275_T_C (TC vs TT)	0.220878	1.22158	0.886662	1.68301
	PTGS2_rs5275_T_C (CC vs TT)	0.470137	1.20047	0.731171	1.97098
codominant	IL1B_rs1143627_T_C	0.454				504	0.668618		0.210099				504	0.586552
	IL1B_rs1143627_T_C (TC vs TT)	0.283013	1.19217	0.864914	1.64324		0.63675		0.208199	1.22926	0.891327	1.69533		0.586552
	IL1B_rs1143627_T_C (CC vs TT)	0.789679	0.934991	0.570549	1.53222		0.831039		0.44451	0.824336	0.502397	1.35257		0.787109
codominant	CXCR2_rs7426289_C_T	0.116748				504	0.557471		0.103673				504	0.541687
	CXCR2_rs7426289_C_T (CT vs CC)	0.214941	1.25697	0.875672	1.80431		0.5805		0.388838	1.17351	0.815538	1.6886		0.745568
	CXCR2_rs7426289_C_T (TT vs CC)	0.485371	0.855829	0.552647	1.32534		0.677328		0.25502	0.774866	0.49944	1.20218		0.608657
codominant	TXNRD3_rs11718498_G_A	0.425919				504	0.651057		0.954925				504	1
	TXNRD3_rs11718498_G_A (GA vs GG)	0.258954	1.21893	0.864373	1.71891		0.610971		0.812322	1.04313	0.736146	1.47812		0.967235
	TXNRD3_rs11718498_G_A (AA vs GG)	0.973475	0.99229	0.628789	1.56593		0.973		0.958289	0.98788	0.625512	1.56017		1
codominant	RRM1_rs12806698_C_A	0.0200631				504	0.3888		0.0454528				504	0.455625
	RRM1_rs12806698_C_A (CA vs CC)	0.00810857	1.52387	1.11561	2.08154		0.324		0.0152092	1.47199	1.07728	2.01131		0.351
	RRM1_rs12806698_C_A (AA vs CC)	0.832805	0.934228	0.49674	1.75702		0.865039		0.941285	1.0242	0.542008	1.93538		1
codominant	PGR_rs608995_A_T	0.344133				503	0.646442		0.382151				503	0.745568
	PGR_rs608995_A_T (AT vs AA)	0.229755	1.21031	0.886364	1.65266		0.581727		0.190502	1.23258	0.901254	1.68572		0.586552
	PGR_rs608995_A_T (TT vs AA)	0.524178	0.764837	0.335181	1.74525		0.687234		0.806954	0.901403	0.392041	2.07256		0.967235
codominant	PGR_rs1042838_G_T	0.264267				504	0.610971		0.44741				504	0.787109
	PGR_rs1042838_G_T (GT vs GG)	0.129009	1.29257	0.928008	1.80036		0.575379		0.20653	1.2389	0.888543	1.7274		0.586552
	PGR_rs1042838_G_T (TT vs GG)	0.642781	0.762319	0.242145	2.39993		0.723375		0.993104	0.994921	0.313548	3.15699		1
codominant (please note that the additive is the best )	MAP3K12_rs784567_T_C	0.33214				504
	MAP3K12_rs784567_T_C (TC vs TT)	0.408029	0.862938	0.608583	1.2236
	MAP3K12_rs784567_T_C (CC vs TT)	0.138306	0.724007	0.472353	1.10973
codominant	15q13_rs4779584_C_T	0.191647				504	0.575379		0.185274				504	0.586552
	15q13_rs4779584_C_T (CT vs CC)	0.0695638	0.721918	0.507751	1.02642		0.557471		0.155468	0.773198	0.542196	1.10262		0.586552
	15q13_rs4779584_C_T (TT vs CC)	0.727474	0.885904	0.448207	1.75103		0.78516		0.181038	0.625188	0.314124	1.24429		0.586552
codominant (please note that the additive is the best )	near_BMP2_rs6038483_C_A	0.0784908				504
	near_BMP2_rs6038483_C_A (CA vs CC)	0.0788713	1.35762	0.96535	1.90929
	near_BMP2_rs6038483_C_A (AA vs CC)	0.0387894	1.65653	1.02634	2.67367
Please note: a) For some SNPs, Cox regression analysis was repeated under multiple genetic models.
b) Those SNPs for which multiple genetic models were estimated, the results of the genetic model that did not yield the smallest p-value are highlighted with grey colour.
c) In cases where the Cox regression p-values were used to identify the best genetic model for a SNP; while comparing the co-dominant model with other genetic models, if any of the three p-values generated were smaller than the p-value of the other genetic model, the co-dominant model was assumed to be the best genetic model
*p-values less than 0.01 are shown in bold.
CI: confidence interval; FDR: False-Discovery Rate; HR: hazards ratio; n: number of patients in the analysis; SNP: single nucleotide polymorphism

## Sheet: Additional File-7
		Cox regression analysis results for disease-free survival (univariate)							Cox regression analysis results for disease-free survival (adjusted for stage)
	SNP	*p-value	HR	95% CI for HR					*p-value	HR	95% CI for HR
Genetic model used in Cox regression analysis				Lower	Upper	n	FDR q-value				Lower	Upper	n	FDR q-value
additive	DDX20_rs197412_T_C	0.00257885	0.714174	0.573764	0.888946	503	0.159		0.00448587	0.725003	0.580788	0.905028	503	0.212
additive	MAP3K12_rs784567_T_C	0.137466	0.862239	0.70906	1.04851	503	0.61904		0.742181	0.967044	0.79202	1.18075	503	0.873626
additive	IRF8_rs1044873_C_T	0.0319145	0.802384	0.656194	0.981143	503	0.326833		0.0120692	0.77241	0.63136	0.944973	503	0.2544
additive (please note that the codominant is the best model)	near_BMP2_rs6038483_C_A	0.112529	1.18816	0.960283	1.47012	503
dominant	SEPN1_rs718391_C_G_dom (CG+GG vs CC)	0.250589	1.19331	0.88271	1.61321	503	0.670829		0.209288	1.21328	0.897207	1.64069	503	0.705562
dominant	HS2ST1_rs9433110_G_A_dom (GA+AA vs GG)	0.791661	0.942828	0.609156	1.45927	503	0.848		0.860331	0.961571	0.621453	1.48783	503	0.919366
dominant	DUSP2_rs1724120_G_A_dom (GA+AA vs GG)	0.204626	1.21541	0.899115	1.64297	503	0.661697		0.175723	1.23162	0.910988	1.6651	503	0.690963
dominant	ALCAM_rs1157_C_T_dom (CT+TT vs CC)	0.266167	0.845245	0.628461	1.13681	503	0.670829		0.275438	0.847475	0.629454	1.14101	503	0.726857
dominant	CD47_rs12695175_A_C_dom (AC+CC vs AA)	0.312182	1.16318	0.867637	1.55939	503	0.670829		0.0685178	1.31604	0.979354	1.76847	503	0.510125
dominant	TXNRD3_rs11718498_G_A_dom (GA+AA vs GG)	0.563565	1.09292	0.808414	1.47756	503	0.723071		0.836675	0.968488	0.714305	1.31312	503	0.919366
dominant	IRF2_rs7685698_T_C_dom (TC+CC vs TT)	0.0582933	1.33652	0.989868	1.80458	503	0.472923		0.0771897	1.31272	0.970761	1.77514	503	0.510125
dominant	IL3_rs181781_G_A_dom (GA+AA vs GG)	0.136059	0.744215	0.504662	1.09748	503	0.61904		0.0984029	0.720454	0.488353	1.06287	503	0.5353
dominant	mir2191_rs213210_T_C_dom (TC+CC vs TT)	0.108661	0.700613	0.45362	1.08209	503	0.61904		0.240122	0.769289	0.496625	1.19165	503	0.706667
dominant	IFNGR1_rs9376267_C_T_dom (CT+TT vs CC)	0.389229	1.13209	0.853556	1.5015	503	0.670829		0.732794	1.05085	0.790477	1.39697	503	0.873626
dominant	IFNGR1_rs1327474_A_G_dom (AG+GG vs AA)	0.00279803	0.642252	0.480415	0.858606	503	0.159		0.017192	0.701125	0.523532	0.938962	503	0.300333
dominant	EZH2_rs3757441_T_C_dom (TC+CC vs TT)	0.287043	0.859657	0.650758	1.13561	503	0.670829		0.364471	0.877493	0.661577	1.16388	503	0.742
dominant (please note that the codominant is the best model)	GWASassociated_susceptibility_allele_rs7014346_G_A_dom (GA+AA vs GG)	0.253172	1.18786	0.884147	1.59591	503
dominant	PTGS1_rs9299281_A_G_dom (AG+GG vs AA)	0.068145	1.33549	0.978674	1.82241	503	0.514857		0.120745	1.28136	0.936843	1.75258	503	0.583
dominant	HSPA5_rs391957_C_T_dom (TC+TT vs CC)	0.010616	0.691765	0.521427	0.917748	503	0.2332		0.00659238	0.67574	0.509304	0.896566	503	0.247333
dominant	TECTB_rs7896275_A_G_dom (AG+GG vs AA)	0.274033	1.22335	0.852457	1.75562	503	0.670829		0.438783	1.15405	0.802983	1.65861	503	0.750548
dominant	PGR_rs1042838_G_T_dom (GT+TT vs GG)	0.605377	1.08444	0.797377	1.47484	503	0.745698		0.684764	1.06584	0.78342	1.45008	503	0.873626
dominant	PGR_rs11224579_C_T_dom (CT+TT vs CC)	0.680837	0.927044	0.646149	1.33005	503	0.78463		0.763854	0.946035	0.658759	1.35859	503	0.880261
dominant	NFKBIA_rs8904_C_T_dom (CT+TT vs CC)	0.320907	0.868238	0.656864	1.14763	503	0.670829		0.600462	0.927929	0.701368	1.22768	503	0.873626
dominant	ESR2_rs8006145_C_A_dom (CA+AA vs CC)	0.403881	0.885807	0.666326	1.17758	503	0.670829		0.354493	0.874035	0.65729	1.16225	503	0.742
dominant	ESR2_rs4986938_G_A_dom (GA+AA vs GG)	0.376996	1.1369	0.855258	1.5113	503	0.670829		0.749923	1.04759	0.787102	1.39429	503	0.873626
dominant	MAP3K9_rs17766621_T_C_dom (TC+CC vs TT)	0.169879	1.22391	0.917168	1.63324	503	0.661697		0.238845	1.18966	0.891088	1.58827	503	0.706667
dominant	GREM1_rs10318_C_T_dom (CT+TT vs CC)	0.168158	0.810094	0.600423	1.09298	500	0.661697		0.101444	0.777304	0.575	1.05079	500	0.5353
dominant	MSRB1_rs732510_A_G_dom (AG+GG vs AA)	0.401067	1.13925	0.840364	1.54443	503	0.670829		0.56303	1.09444	0.806064	1.486	503	0.873626
dominant	near_BMP2_rs355530_A_C_dom (AC+CC vs AA)	0.230577	1.19177	0.894601	1.58766	503	0.670829		0.094083	1.2786	0.958925	1.70486	503	0.5353
recessive (please note that the additive is the best model)	DDX20_rs197412_T_C_rec (CC vs TC+TT)	0.0426936	0.597957	0.363659	0.983211	503
recessive	MSH2_rs7607076_A_G_rec (GG vs AG+AA)	0.664654	1.10566	0.702095	1.74119	503	0.774615		0.602094	1.12915	0.715241	1.78259	503	0.873626
recessive	MSH6_rs3136245_C_T_rec (TT vs CT+CC)	0.428397	0.698492	0.287394	1.69764	502	0.670829		0.115178	0.487687	0.199591	1.19163	502	0.580476
recessive	IL1A_rs10496444_T_C_rec (CC vs TC+TT)	0.133489	1.3521	0.911764	2.0051	503	0.61904		0.336508	1.21551	0.816409	1.80972	503	0.742
recessive	IL1B_rs1143627_T_C_rec (CC vs TC+TT)	0.464931	0.852904	0.55663	1.30688	503	0.682466		0.211044	0.760949	0.495939	1.16757	503	0.705562
recessive	RAF1_rs7643321_A_G_rec (GG vs AG+AA)	0.460566	0.68867	0.255714	1.85467	503	0.682466		0.864954	0.917229	0.338892	2.48253	503	0.919366
recessive	RAF1_rs6795441_A_G_rec (GG vs AG+AA)	0.360457	1.17102	0.834866	1.64252	500	0.670829		0.488116	1.12736	0.803305	1.58215	500	0.80825
recessive	mir26a1_rs7372209_C_T_rec (TT vs CT+CC)	0.122821	1.40902	0.911514	2.17805	503	0.61904		0.165757	1.36191	0.879919	2.10792	503	0.676769
recessive	CLOCK_rs1801260_T_C_rec (CC vs TC+TT)	0.772279	0.910266	0.481539	1.7207	502	0.838265		0.932081	1.02828	0.54151	1.9526	502	0.940876
recessive	EGF_rs4444903_A_G_rec (GG vs AG+AA)	0.370887	1.18149	0.81994	1.70246	502	0.670829		0.345796	1.19507	0.825084	1.73096	502	0.742
recessive	IRF2_rs3822118_C_T_rec (TT vs CT+CC)	0.144976	0.667423	0.387496	1.14957	503	0.61904		0.279033	0.740174	0.429288	1.2762	503	0.726857
recessive	MAP3K1_rs11960484_G_A_rec (AA vs AG+GG)	0.246271	1.24112	0.86145	1.78811	503	0.670829		0.285755	1.22018	0.846726	1.75836	503	0.726857
recessive (please note that the dominant is the best model)	IFNGR1_rs9376267_C_T_rec (TT vs CT+CC)	0.730394	1.10033	0.638779	1.89538	503
recessive	TNFAIP3_rs6920220_G_A_rec (AA vs AG+GG)	0.0774591	0.547424	0.280444	1.06857	503	0.544133		0.213268	0.652731	0.333418	1.27785	503	0.705562
recessive (please note that the dominant is the best model)	EZH2_rs3757441_T_C_rec (CC vs TC+TT)	0.490836	0.84335	0.519421	1.36929	503
recessive	ANGPT1_rs1954727_C_G_rec (GG vs CG+CC)	0.182207	1.36984	0.862716	2.17505	503	0.661697		0.439407	1.20249	0.7535	1.91902	503	0.750548
recessive	near_POU5F1B_rs10505477_T_C_rec (CC vs TC+TT)	0.290428	0.829334	0.586216	1.17328	503	0.670829		0.582653	0.906653	0.639213	1.28599	503	0.873626
recessive	near_MYC_rs6983267_G_T_rec (TT vs GT+GG)	0.366583	0.850996	0.599538	1.20792	503	0.670829		0.686475	0.92999	0.65376	1.32293	503	0.873626
recessive	TLR4_rs1554973_T_C_rec (CC vs TC+TT)	0.516201	0.809916	0.428569	1.53059	503	0.711525		0.569764	0.831015	0.438938	1.57331	503	0.873626
recessive	CXCL12_rs1801157_G_A_rec (AA vs AG+GG)	0.535802	1.25093	0.615808	2.5411	492	0.711525		0.388497	1.3665	0.672033	2.77863	492	0.750548
recessive	SCD_rs7849_A_G_rec (GG vs AG+AA)	0.442874	0.678574	0.252036	1.82697	503	0.670829		0.707876	0.8266	0.305281	2.23816	503	0.873626
recessive	CASP7_rs2227310_C_G_rec (GG vs CG+CC)	0.534914	1.17573	0.705081	1.96053	503	0.711525		0.733312	1.09316	0.654892	1.82471	503	0.873626
recessive (please note that the codominant is the best model)	RRM1_rs12806698_C_A_rec (AA vs CA+CC)	0.15556	0.643359	0.350026	1.18251	503
recessive	PGR_rs543215_A_G_rec (GG vs AG+AA)	0.630488	1.19011	0.585619	2.41856	503	0.754956		0.571403	1.2281	0.60287	2.50175	503	0.873626
recessive	LOC120376_locus_rs10749971_A_G_rec (GG vs AG+AA)	0.0244763	0.588245	0.370495	0.933971	503	0.326833		0.0283508	0.595476	0.374625	0.946524	503	0.371
recessive	IGF1_rs6220_A_G_rec (GG vs AG+AA)	0.500627	0.829603	0.481697	1.42878	503	0.711525		0.334124	0.764693	0.443658	1.31803	503	0.742
recessive	ESR2_rs4365213_T_C_rec (CC vs TC+TT)	0.63773	0.910863	0.617564	1.34346	503	0.754956		0.875899	0.969451	0.656782	1.43097	503	0.919366
recessive	ESR2_rs1256030_T_C_rec (CC vs TC+TT)	0.422464	0.8754	0.632405	1.21176	503	0.670829		0.615566	0.919876	0.663983	1.27439	503	0.873626
recessive	ESR2_rs2987983_T_C_rec (CC vs TC+TT)	0.415592	0.797853	0.46323	1.3742	503	0.670829		0.917903	0.971545	0.561142	1.68211	503	0.940876
recessive	ESR2_rs2978381_T_C_rec (CC vs TC+TT)	0.404066	0.838937	0.555353	1.26733	503	0.670829		0.729826	0.929642	0.614474	1.40646	503	0.873626
recessive	ESR2_rs3020443_A_C_rec (CC vs AC+AA)	0.632486	0.849361	0.434998	1.65843	503	0.754956		0.690398	1.14774	0.5826	2.2611	503	0.873626
recessive	DICER1_rs13078_T_A_rec (AA vs AT+TT)	0.415447	0.69143	0.284483	1.68051	503	0.670829		0.586578	0.781353	0.321106	1.90128	503	0.873626
recessive	MAP2K1_rs8039880_A_G_rec (GG vs AG+AA)	0.304123	1.48553	0.698326	3.16014	503	0.670829		0.380064	1.40276	0.658856	2.98658	503	0.750548
recessive	MSRB1_rs13331553_T_C_rec (CC vs TC+TT)	0.856903	0.955252	0.580777	1.57118	503	0.890608		0.843786	0.951167	0.578086	1.56503	503	0.919366
recessive	IRF8_rs16882_A_G_rec (GG vs AG+AA)	0.146412	0.429493	0.137283	1.34368	503	0.61904		0.157614	0.439314	0.140385	1.37477	503	0.66992
recessive (please note that the additive is the best model)	IRF8_rs1044873_C_T_rec (TT vs CT+CC)	0.0670118	0.674784	0.442952	1.02795	503
recessive	GEMIN4_rs2740348_G_C_rec (CC vs CG+GG)	0.8552	1.07279	0.504405	2.28165	503	0.890608		0.715388	1.151	0.54049	2.45109	503	0.873626
recessive	SHMT1_rs1979277_G_A_rec (AA vs AG+GG)	0.537119	1.14993	0.737894	1.79206	503	0.711525		0.417287	1.20298	0.76971	1.88015	503	0.750548
recessive	MIR423_rs6505162_A_C_rec (CC vs AC+AA)	0.0289091	1.44491	1.03859	2.0102	503	0.326833		0.0424288	1.40933	1.01179	1.96306	503	0.4452
recessive	SMAD7_rs4939827_T_C_rec (CC vs TC+TT)	0.572856	0.899236	0.621638	1.3008	503	0.723071		0.300109	0.822195	0.567741	1.19069	503	0.739535
recessive	SMAD7_rs4464148_T_C_rec (CC vs TC+TT)	0.368941	1.18957	0.814573	1.73719	503	0.670829		0.714898	1.07414	0.73183	1.57655	503	0.873626
recessive (please note that the codominant is the best model)	near_BMP2_rs6038483_C_A_rec (AA vs CA+CC)	0.165386	1.32697	0.889753	1.97904	503
recessive	GNAS_rs7121_C_T_rec (TT vs CT+CC)	0.568373	1.1007	0.791594	1.5305	503	0.723071		0.958238	1.00889	0.72444	1.40502	503	0.958
codominant (please note that the additive is the best model)	DDX20_rs197412_T_C	0.0111269				503
	DDX20_rs197412_T_C (TC vs TT)	0.0304549	0.725062	0.541904	0.970126
	DDX20_rs197412_T_C (CC vs TT)	0.00882391	0.499165	0.296759	0.839623
codominant	CRP_rs1205_C_T	0.238062				503	0.670829		0.39474				503	0.750548
	CRP_rs1205_C_T (CT vs CC)	0.107517	0.781132	0.578211	1.05527		0.61904		0.221017	0.828089	0.612177	1.12015		0.706667
	CRP_rs1205_C_T (TT vs CC)	0.941812	0.984442	0.646149	1.49985		0.969437		0.897703	1.02803	0.67452	1.5668		0.933216
codominant	PTGS2_rs5275_T_C	0.0234007				503	0.326833		0.0114443				503	0.2544
	PTGS2_rs5275_T_C (TC vs TT)	0.00945967	1.47746	1.10023	1.98403		0.2332		0.00415077	1.5411	1.14657	2.0714		0.212
	PTGS2_rs5275_T_C (CC vs TT)	0.974243	1.00811	0.617472	1.64587		0.974		0.872167	1.04118	0.636864	1.70218		0.919366
codominant	CXCR2_rs7426289_C_T	0.317869				503	0.670829		0.397396				503	0.750548
	CXCR2_rs7426289_C_T (CT vs CC)	0.206445	1.24427	0.886483	1.74646		0.661697		0.329242	1.18495	0.842646	1.6663		0.742
	CXCR2_rs7426289_C_T (TT vs CC)	0.969053	1.00787	0.678195	1.49781		0.974		0.829985	0.957459	0.643854	1.42381		0.919366
codominant	IRF2_rs12504466_T_C	0.38347				503	0.670829		0.344236				503	0.742
	IRF2_rs12504466_T_C (TC vs TT)	0.198776	1.24873	0.889884	1.75229		0.661697		0.149377	1.28339	0.91422	1.80163		0.658083
	IRF2_rs12504466_T_C (CC vs TT)	0.766594	1.06565	0.700293	1.62162		0.838265		0.536048	1.14209	0.749792	1.73965		0.873626
codominant	XPO5_rs11077_A_C	0.534059				503	0.711525		0.187707				503	0.701793
	XPO5_rs11077_A_C (AC vs AA)	0.397043	0.874036	0.640051	1.19356		0.670829		0.4321	0.882556	0.646216	1.20533		0.750548
	XPO5_rs11077_A_C (CC vs AA)	0.774963	1.05852	0.716762	1.56323		0.838265		0.252349	1.25889	0.848757	1.86719		0.721946
codominant	GWAS_associated_susceptibility_allele_rs7014346_G_A	0.438066				503	0.670829		0.439321				503	0.750548
	GWAS_associated_susceptibility_allele_rs7014346_G_A (GA vs GG)	0.203761	1.22295	0.896623	1.66804		0.661697		0.343688	1.16253	0.85119	1.58775		0.742
	GWAS_associated_susceptibility_allele_rs7014346_G_A (AA vs GG)	0.692075	1.08912	0.713822	1.66174		0.788731		0.72852	0.927049	0.60442	1.42189		0.873626
codominant	MIR604_rs2368392_C_T	0.189338				503	0.661697		0.0823561				503	0.511294
	MIR604_rs2368392_C_T (CT vs CC)	0.123052	1.2553	0.940246	1.67593		0.61904		0.0339509	1.3698	1.02413	1.83215		0.400444
	MIR604_rs2368392_C_T (TT vs CC)	0.533271	0.826945	0.454847	1.50345		0.711525		0.817402	0.931684	0.510972	1.69879		0.919366
codominant	MIR608_rs4919510_C_G	0.470282				503	0.682466		0.796291				503	0.907269
	MIR608_rs4919510_C_G (CG vs CC)	0.252219	0.83431	0.611866	1.13762		0.670829		0.684623	0.937086	0.684855	1.28221		0.873626
	MIR608_rs4919510_C_G (GG vs CC)	0.769499	1.11262	0.544953	2.2716		0.838265		0.631953	1.19093	0.582595	2.43447		0.873626
codominant	RRM1_rs12806698_C_A	0.0346243				503	0.326833		0.0754948				503	0.510125
	RRM1_rs12806698_C_A (CA vs CC)	0.0320016	1.36805	1.02732	1.82178		0.326833		0.0539084	1.32597	0.99527	1.76655		0.477
	RRM1_rs12806698_C_A (AA vs CC)	0.344034	0.739759	0.396215	1.38118		0.670829		0.45469	0.786916	0.41985	1.4749		0.765556
codominant	MAP3K11_rs1151488_A_G	0.438809				503	0.670829		0.288381				503	0.726857
	MAP3K11_rs1151488_A_G (AG vs AA)	0.28409	0.850214	0.631806	1.14412		0.670829		0.191801	0.820491	0.609606	1.10433		0.701793
	MAP3K11_rs1151488_A_G (GG vs AA)	0.706371	1.09297	0.688264	1.73564		0.796128		0.628955	1.12112	0.705106	1.78257		0.873626
codominant	PGR_rs608995_A_T	0.58817				502	0.733271		0.653293				502	0.873626
	PGR_rs608995_A_T (AT vs AA)	0.339161	1.15231	0.861622	1.54108		0.670829		0.357124	1.14668	0.85689	1.53447		0.742
	PGR_rs608995_A_T (TT vs AA)	0.819615	0.919996	0.449294	1.88383		0.8692		0.928269	1.03374	0.501895	2.12919		0.940876
codominant	PGR_rs660541_G_A	0.571246				503	0.723071		0.740271				503	0.873626
	PGR_rs660541_G_A (GA vs GG)	0.364738	0.855967	0.611506	1.19816		0.670829		0.439056	0.87538	0.624861	1.22634		0.750548
	PGR_rs660541_G_A (AA vs GG)	0.955653	0.98915	0.673414	1.45292		0.974		0.634016	0.910075	0.617451	1.34138		0.873626
codominant (please note that the additive is the best model)	MAP3K12_rs784567_T_C	0.332836				503
	MAP3K12_rs784567_T_C (TC vs TT)	0.411581	0.872738	0.630632	1.20779
	MAP3K12_rs784567_T_C (CC vs TT)	0.138351	0.742037	0.500101	1.10102
codominant	15q13_rs4779584_C_T	0.036889				503	0.326833		0.0599206				503	0.489231
	15q13_rs4779584_C_T (CT vs CC)	0.0103111	0.649257	0.466759	0.903109		0.2332		0.0261622	0.685864	0.491932	0.95625		0.371
	15q13_rs4779584_C_T (TT vs CC)	0.640758	0.857853	0.450541	1.63339		0.754956		0.271548	0.69537	0.363874	1.32886		0.726857
codominant (please note that the additive is the best model)	IRF8_rs1044873_C_T	0.0979037				503
	IRF8_rs1044873_C_T (CT vs CC)	0.267104	0.845065	0.627724	1.13766
	IRF8_rs1044873_C_T (TT vs CC)	0.0345717	0.617733	0.395171	0.965645
codominant	near_BMP2_rs6038483_C_A	0.26296				503	0.670829		0.142079				503	0.654435
	near_BMP2_rs6038483_C_A (CA vs CC)	0.377645	1.14869	0.844229	1.56294		0.670829		0.226515	1.20958	0.888615	1.64649		0.706667
	near_BMP2_rs6038483_C_A (AA vs CC)	0.105011	1.44154	0.926386	2.24315		0.61904		0.0536333	1.54657	0.993205	2.40824		0.477
Please note: a) For some SNPs, Cox regression analysis was repeated under multiple genetic models.
b) Those SNPs for which multiple genetic models were estimated, the results of the genetic model that did not yield the smallest p-value are highlighted with grey colour.
c) In cases where the Cox regression p-values were used to identify the best genetic model for a SNP; while comparing the co-dominant model with other genetic models, if any of the three p-values generated were smaller than the p-value of the other genetic model, the co-dominant model was assumed to be the best genetic model
*p-values less than 0.01 are shown in bold.
CI: confidence interval; FDR: False-Discovery Rate; HR: hazards ratio; n: number of patients in the analysis; SNP: single nucleotide polymorphism
